# Supplementary material for: How to Make Epidemiological Training Infectious
Source: PLOS journal article supplement (doi:10.1371/journal.pbio.1001295), 2012-04-03

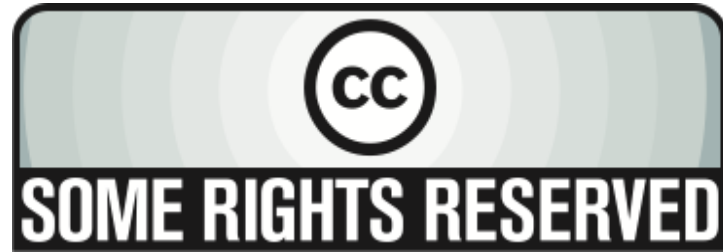

This presentation is made available through a Creative Commons Attribution license.  
Details of the license and permitted uses are available at  
<http://creativecommons.org/licenses/by-nc/3.0/>

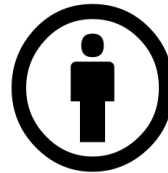

**© 2010 Dr. Juliet Pulliam**

Title: Introduction to Infectious Disease Dynamics, Part I

Attribution: Dr. Juliet Pulliam, Topics in Biomedical Sciences

Source URL: [http://lalashan.mcmaster.ca/theobio/mmed/index.php/Honours Course](http://lalashan.mcmaster.ca/theobio/mmed/index.php/Honours_Course)

For further information please contact Dr. Juliet Pulliam ([juliet.mmed.clinic@gmail.com](mailto:juliet.mmed.clinic@gmail.com)).

# Introduction to infectious disease dynamics I

Dr. Juliet Pulliam  
RAPIDD Program  
Division of International Epidemiology  
Fogarty International Center  
National Institutes of Health (USA)

Introduction to Biomedical Sciences  
BSc Honours Course in Biomathematics  
African Institute for the Mathematical Sciences  
Muizenberg, South Africa  
17 May 2010

Infectious diseases

# Terminology



Exposed

Exposure -  
potentially  
infectious  
contact between  
a parasitic  
organism and a  
potential host

Infectious diseases

# Terminology



A Venn diagram consisting of two concentric circles. The outer circle is white and labeled 'Exposed'. The inner circle is light blue and labeled 'Infected'. The inner circle is entirely contained within the outer circle, illustrating that all infected individuals are also exposed.

Exposed

Infected

Infection - a  
parasitic  
organism enters  
a host

## Infectious diseases

# Terminology

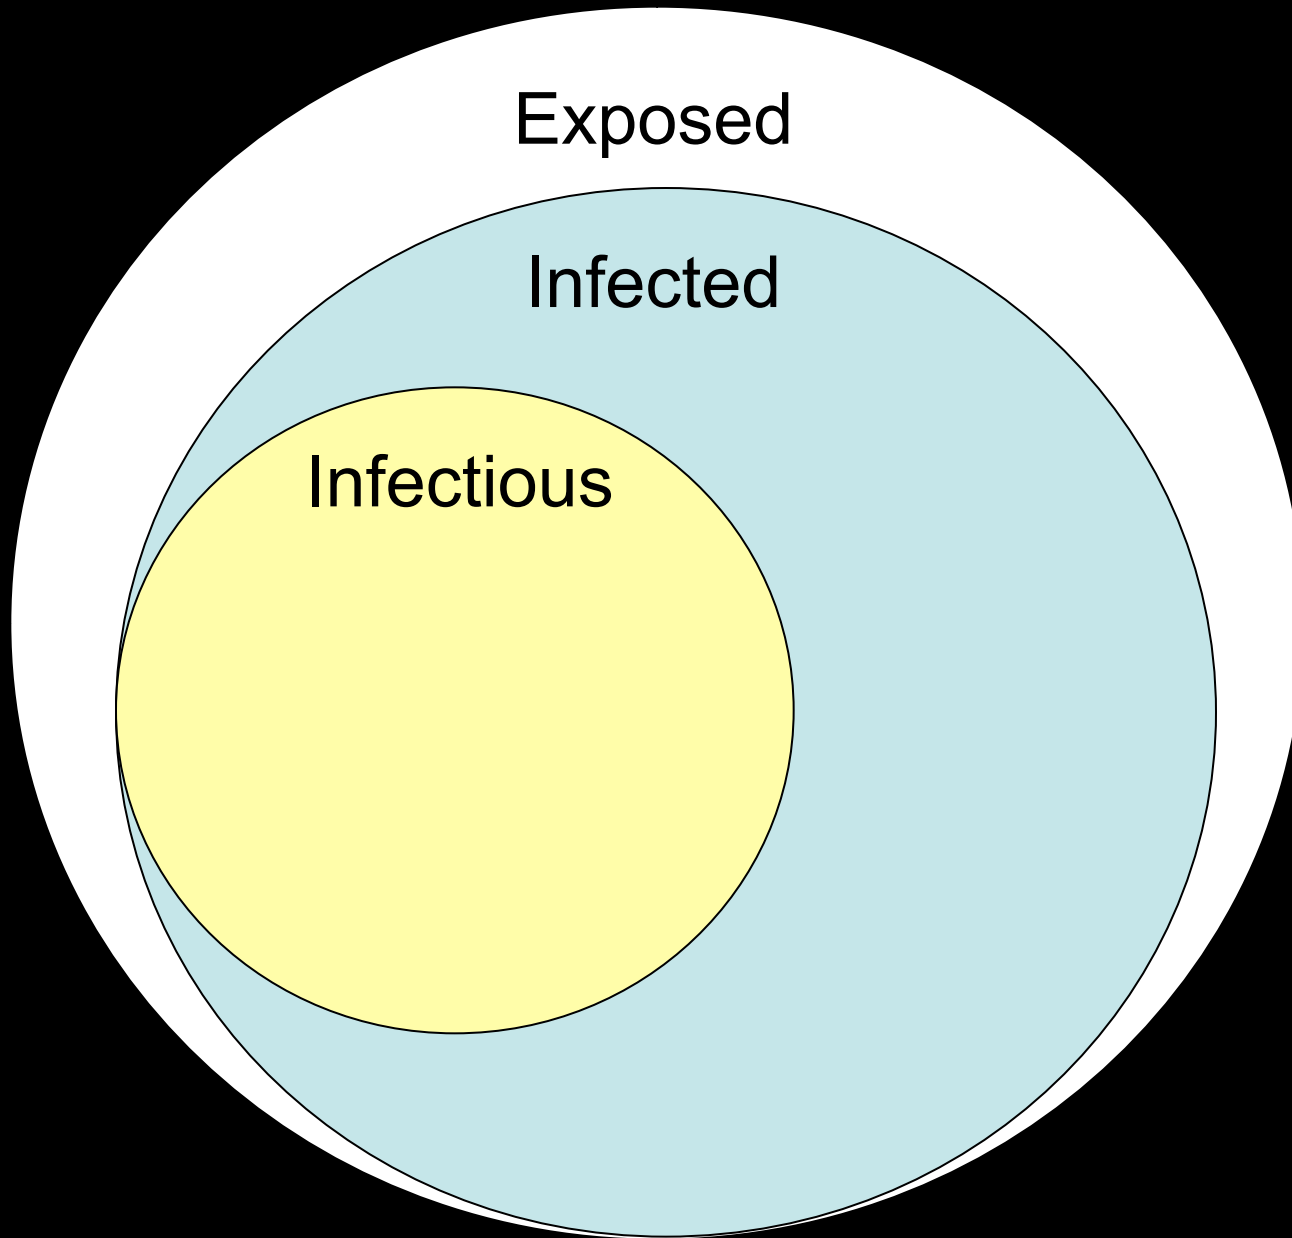

Transmission - a parasitic organism replicates within an infected host, and the infected host sheds infectious individuals (the host is said to be “infectious” or “transmitting”)

## Infectious diseases

# Terminology

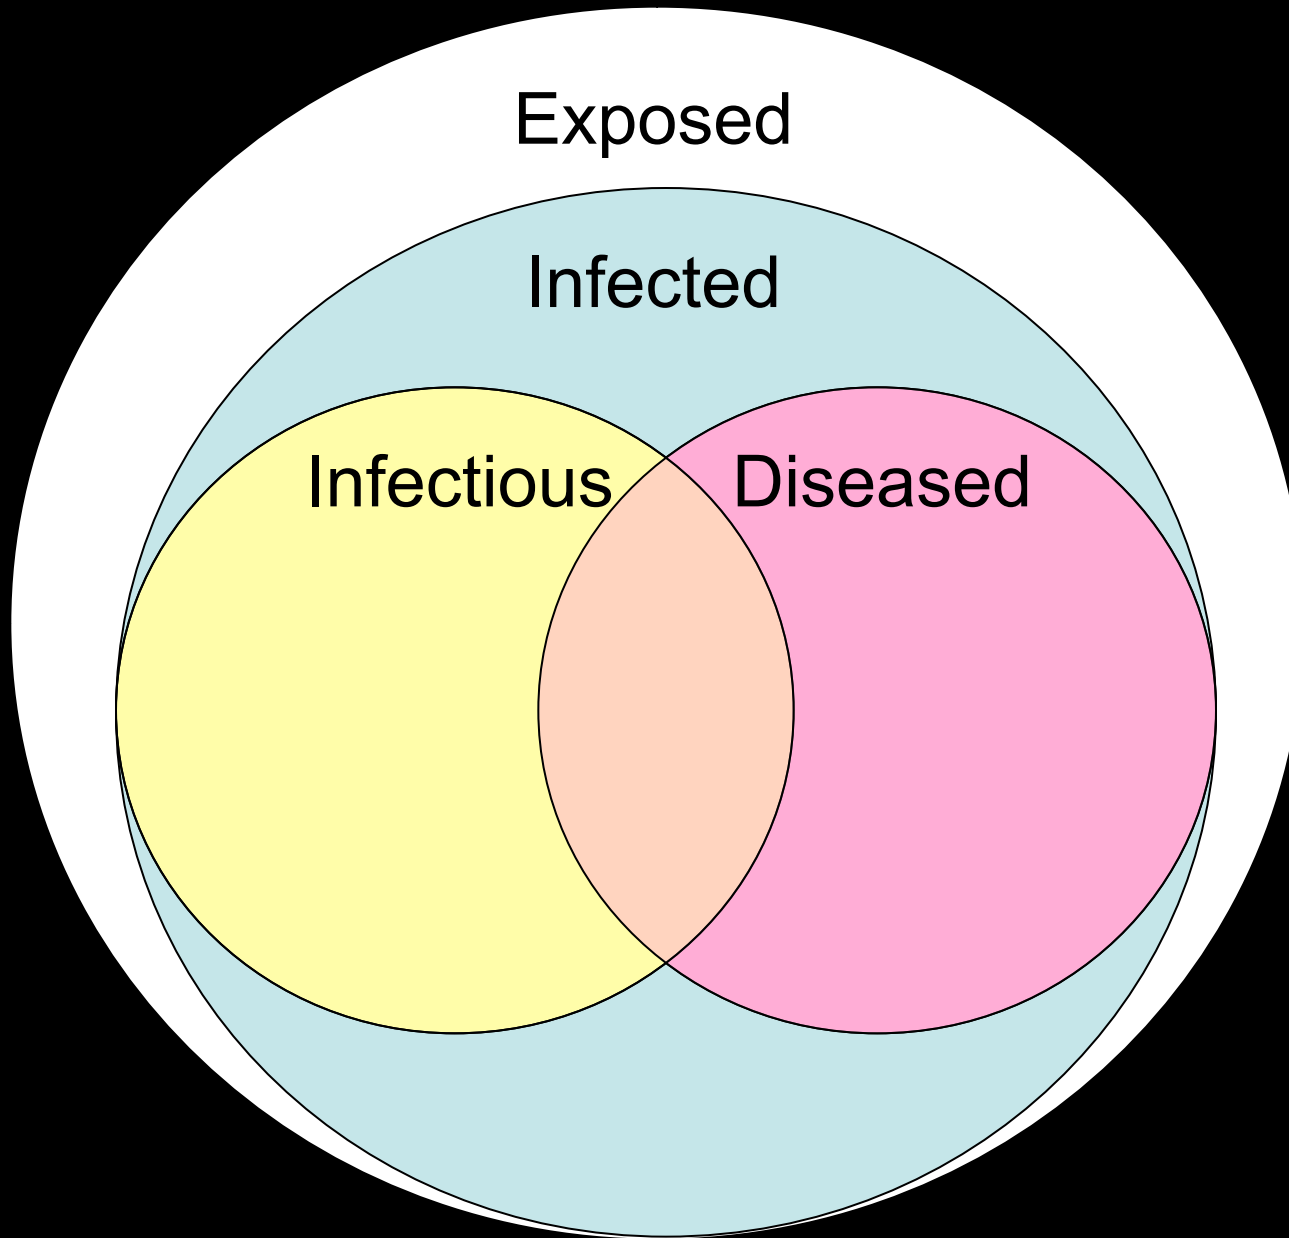

Pathogenesis -  
a parasitic  
organism  
causes changes  
in the physiology  
of an infected  
host, affecting  
survival and/or  
reproduction  
(the host is said  
to be  
“diseased”)

Infectious diseases

# Terminology

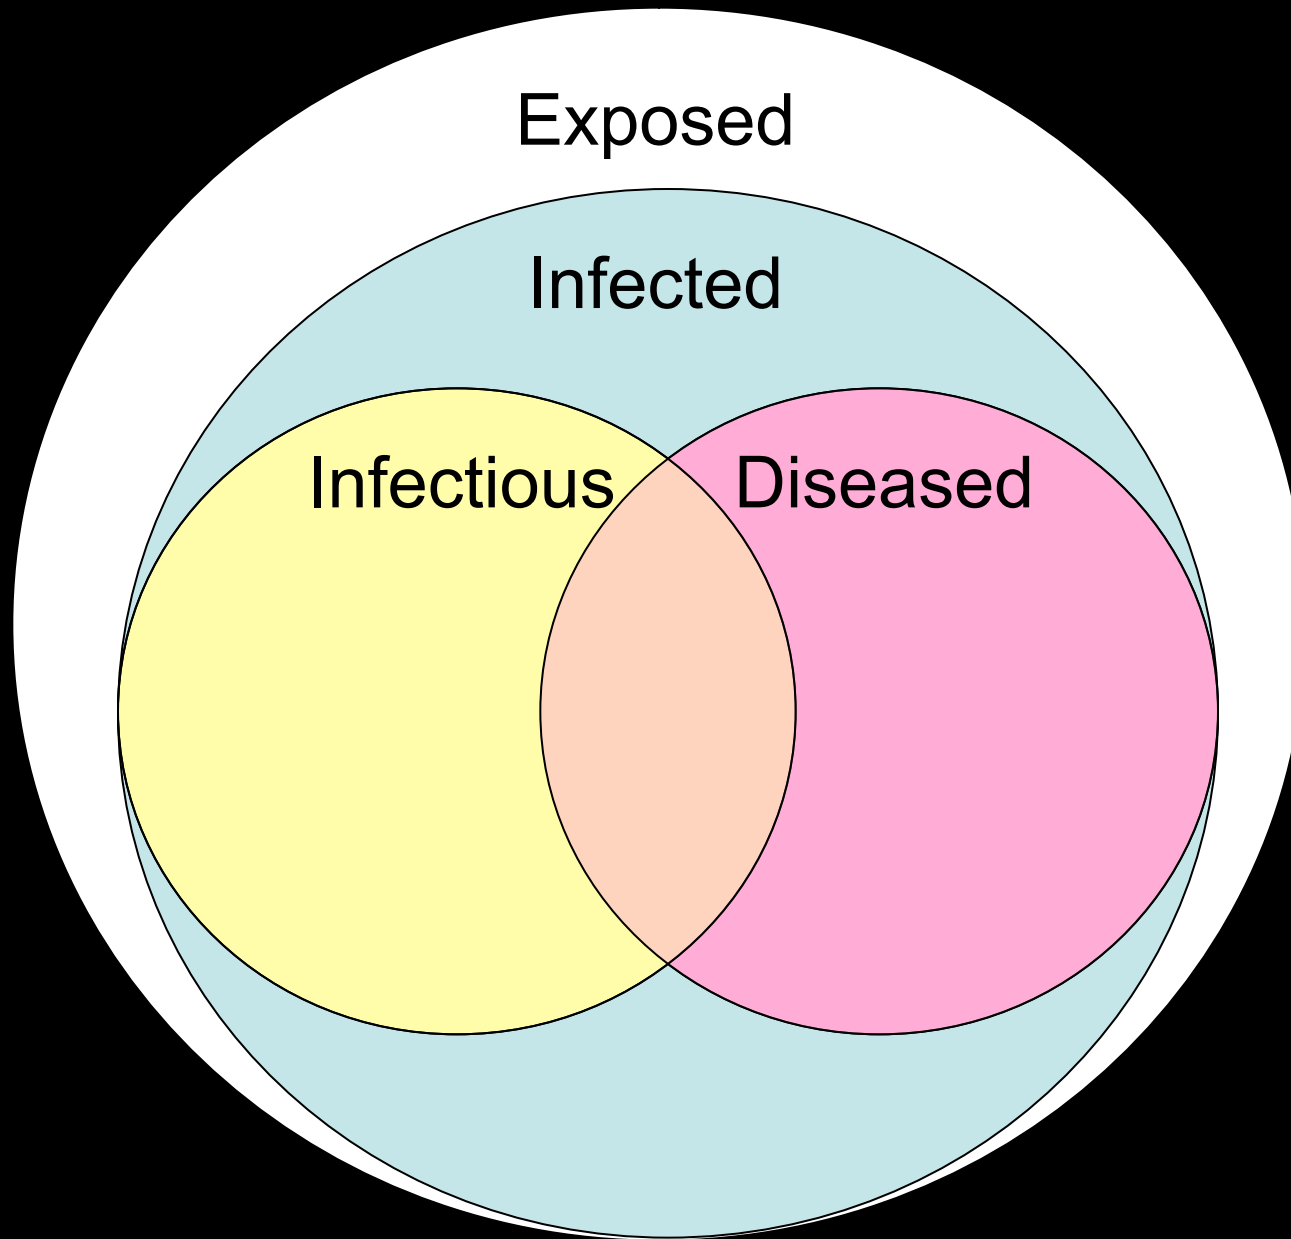

Infectious disease dynamics are determined -- to a large extent -- by the duration of these states, as well as the degree and timing of overlap

# Infectious diseases

## Terminology

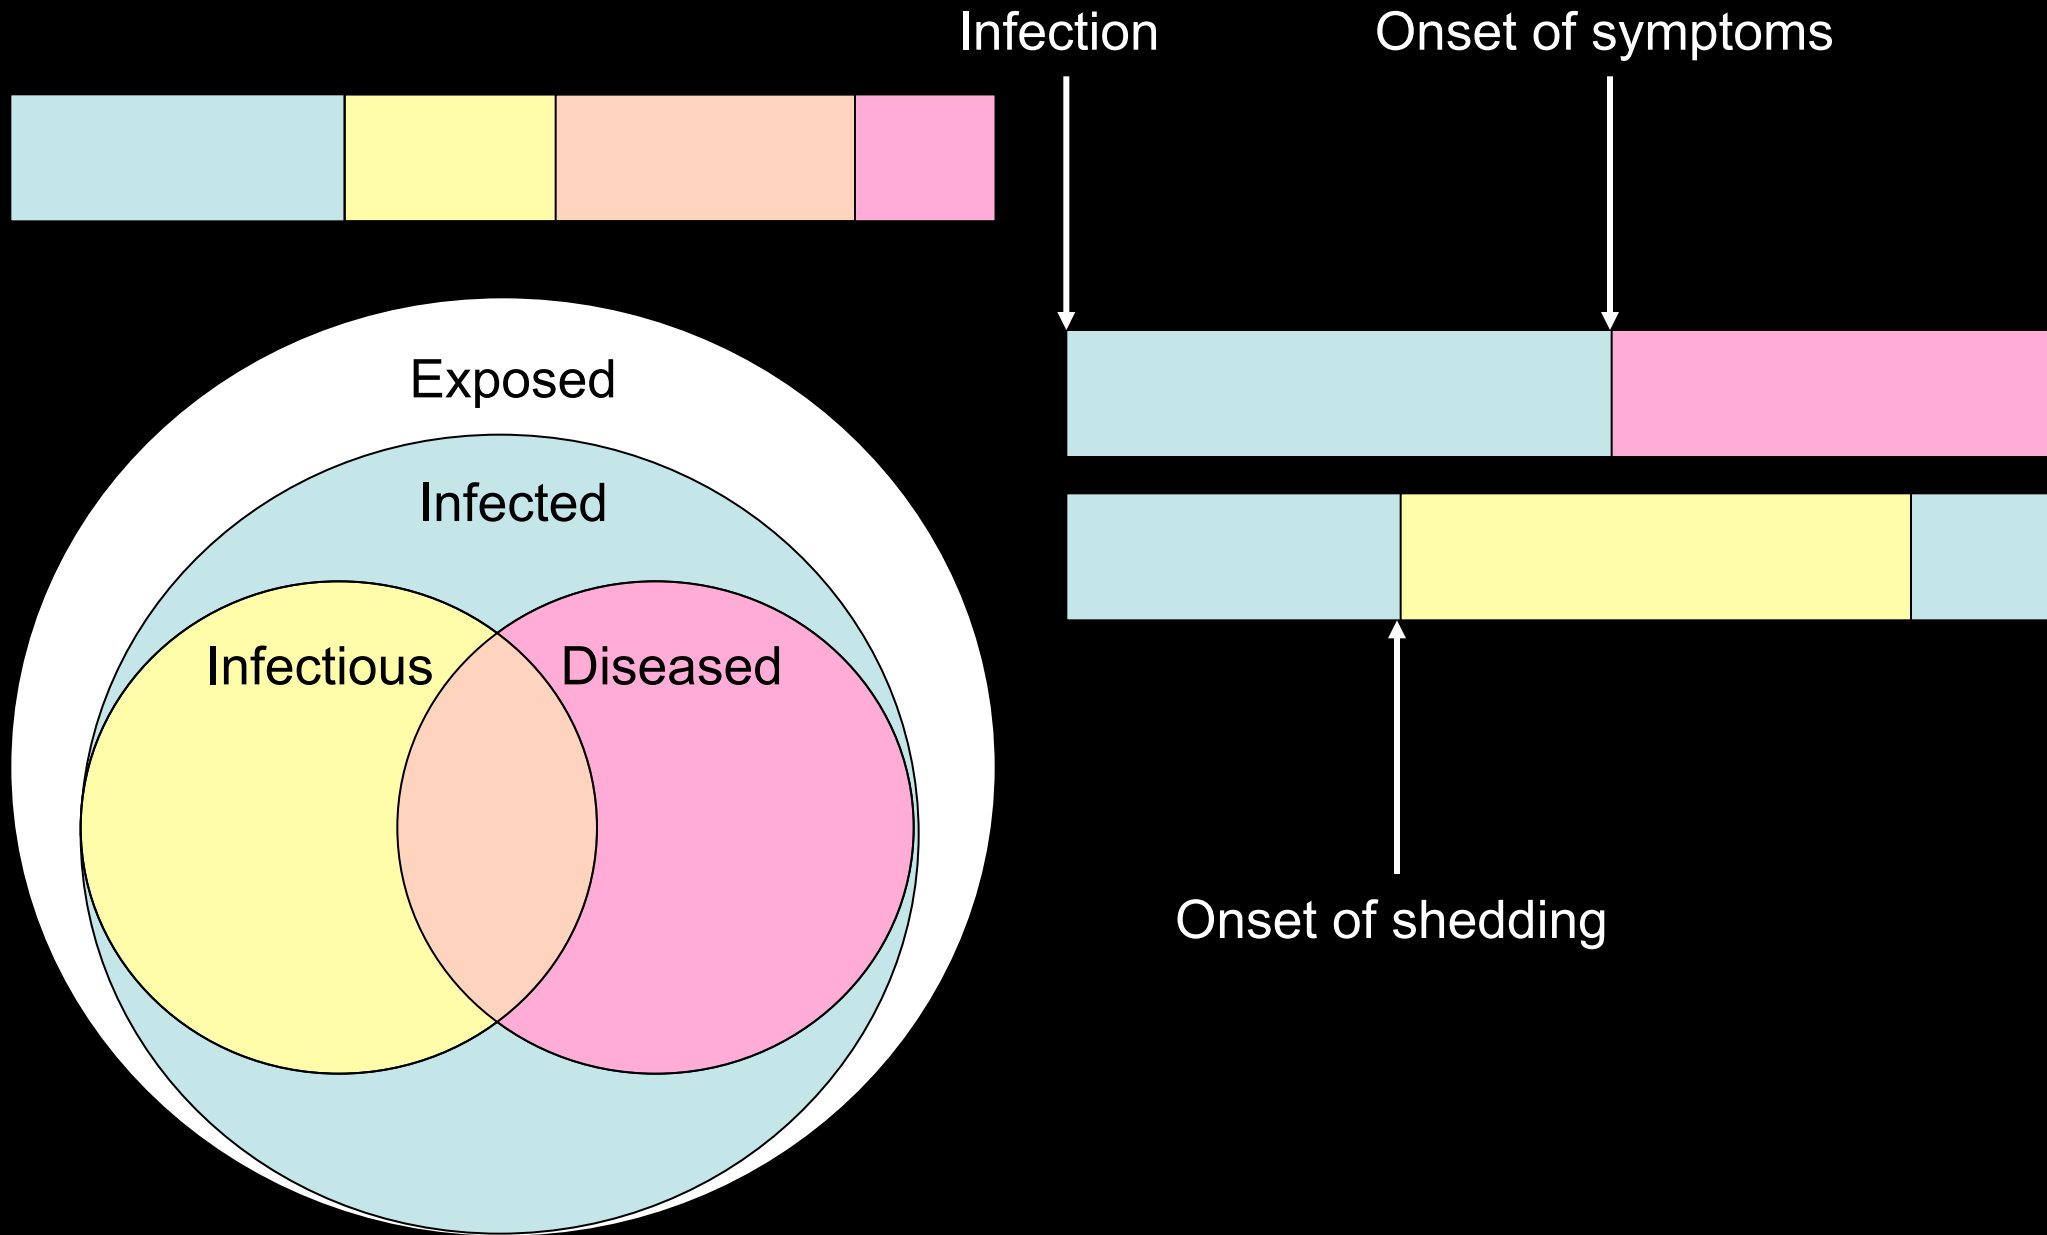

# Infectious diseases

## Terminology

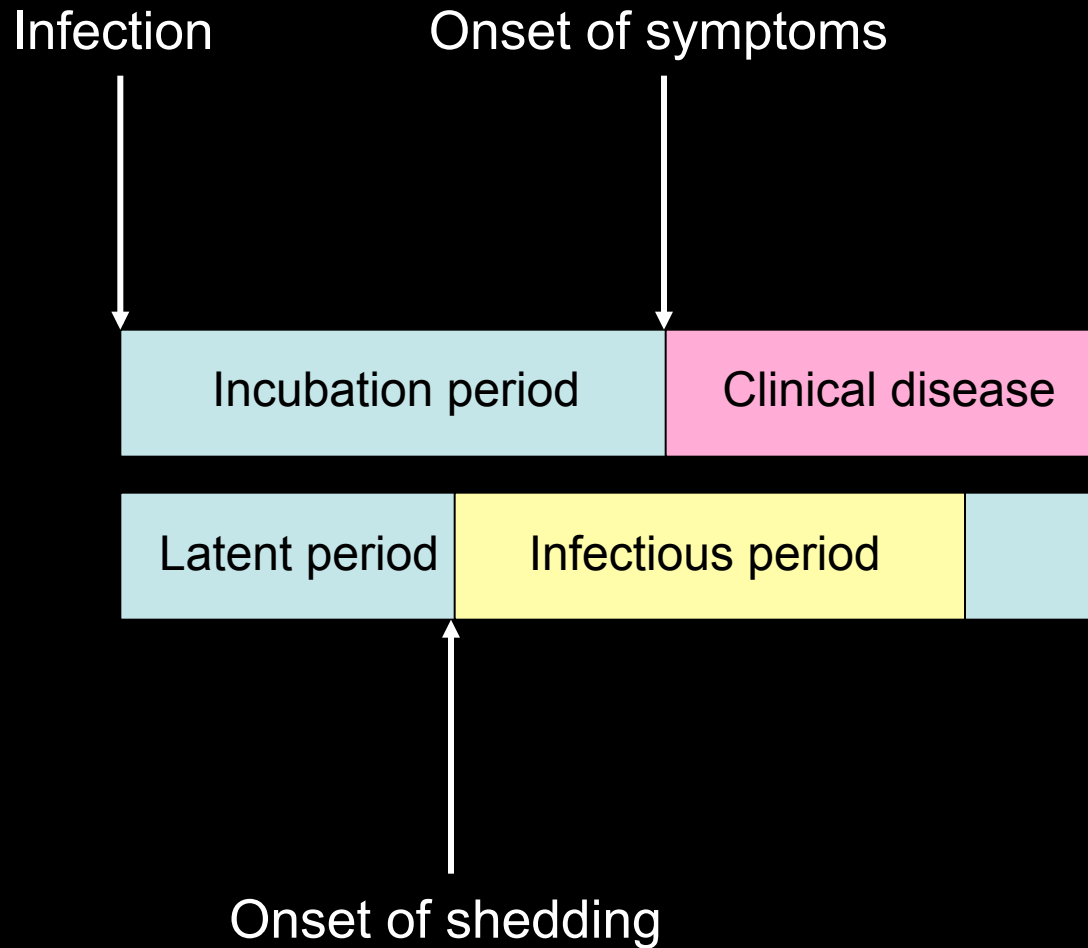

# Infectious diseases

## Terminology

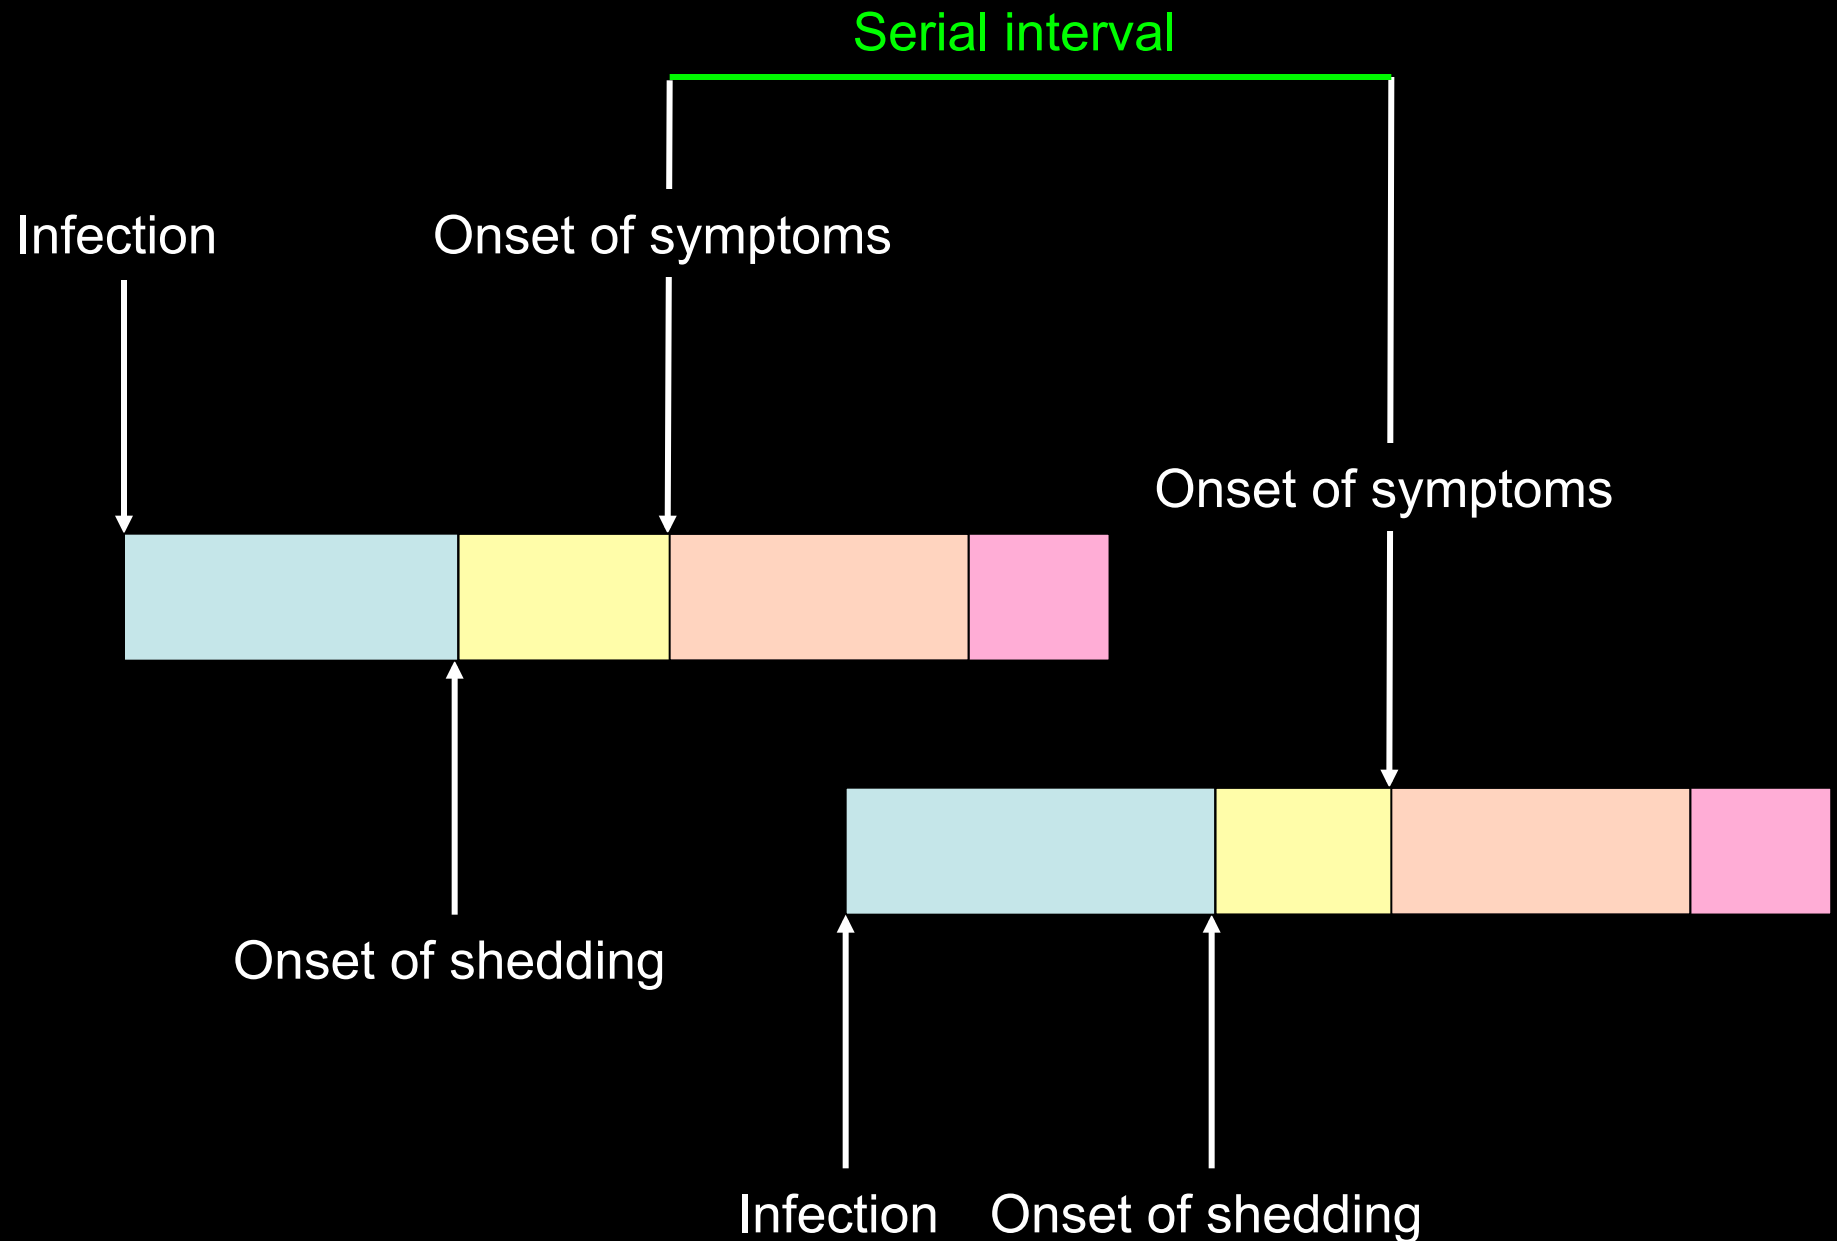

Infectious diseases

# Transmission

## Mode of transmission

### Direct transmission

Direct contact

Droplet spread

### Indirect transmission

Airborne

Vehicle-borne (fomites)

Vector-borne (mechanical or biological)

## Portal of entry

## Portal of exit

# Infectious diseases

## Immunity

### Active immunity

Requires stimulation of antibody production

Response to many infections

Induced by most vaccines

Long-lasting

### Passive immunity

Presence of antibodies without stimulating  
production

Maternal antibodies

Immunoglobulin injections

Transient

# Infectious disease dynamics

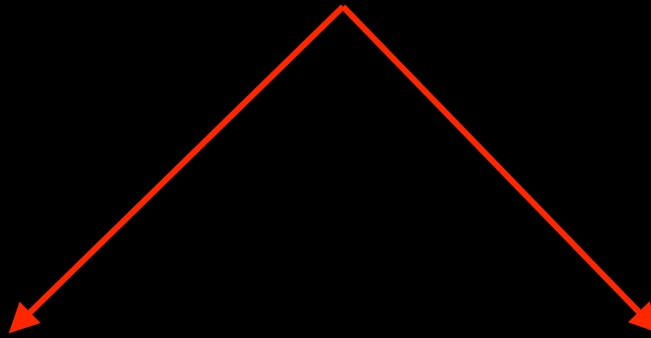

## Traditional epidemiology

Outbreak investigation

Disease surveillance

On-the-ground management

## Mathematical epidemiology

General principles

Explanation of patterns

Prediction of spread and control

Assessment of necessary data

Shoe-leather epidemiology

# Terminology

Endemic level of disease  
("hyperendemic")

Epidemic

Disease outbreak

Pandemic

Sporadic cases and clusters

# Shoe-leather epidemiology

## Epidemic curves

Common source epidemics  
point source exposure

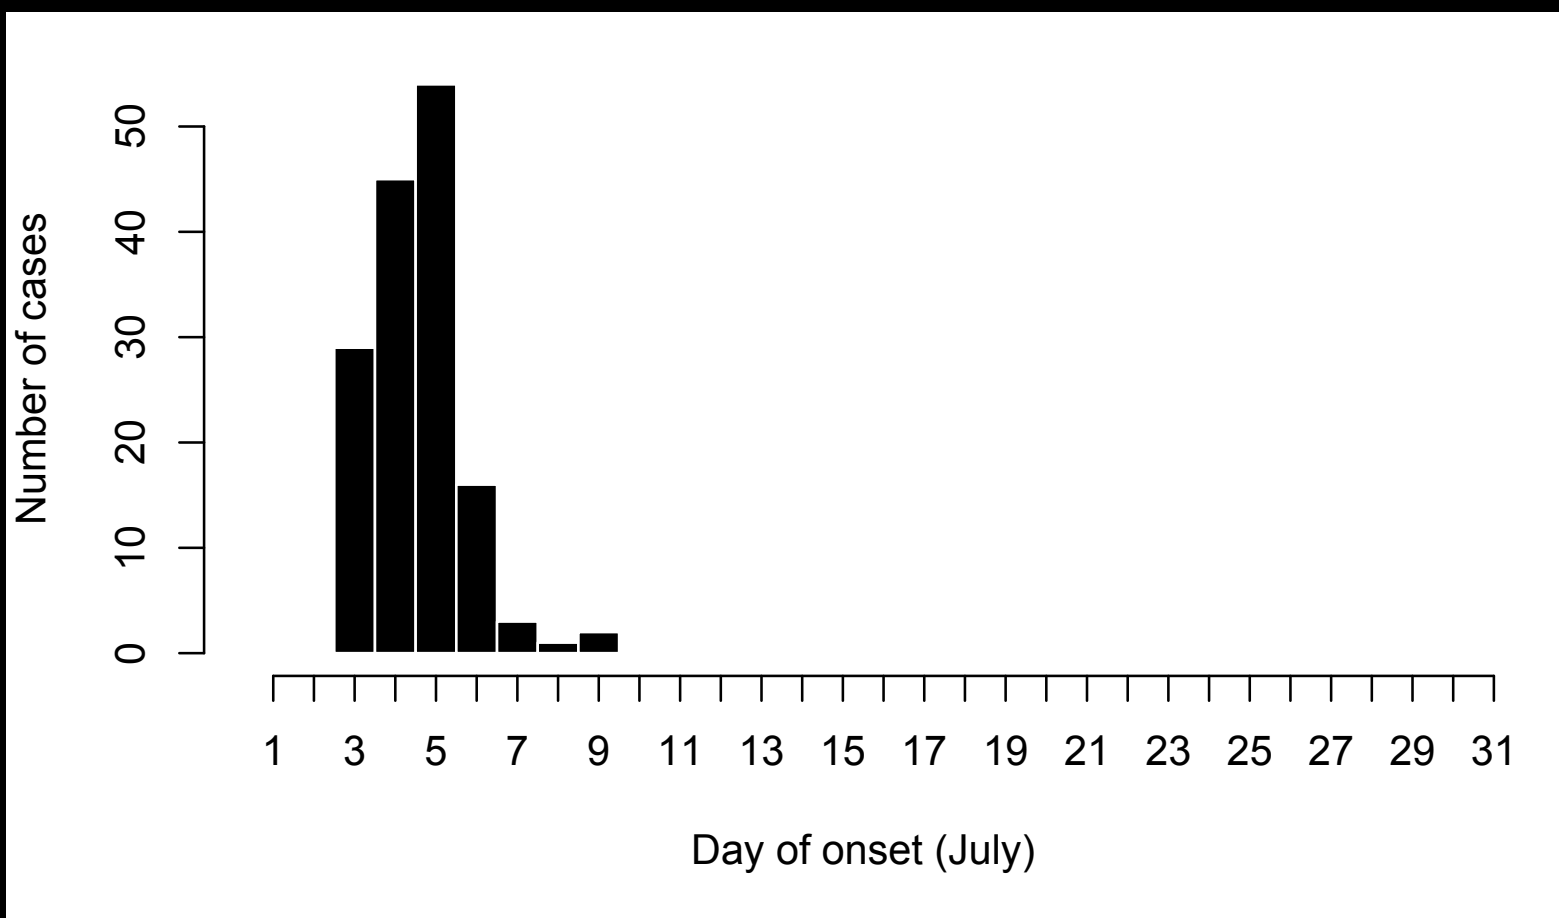

# Shoe-leather epidemiology

## Epidemic curves

Common source epidemics  
continuous exposure

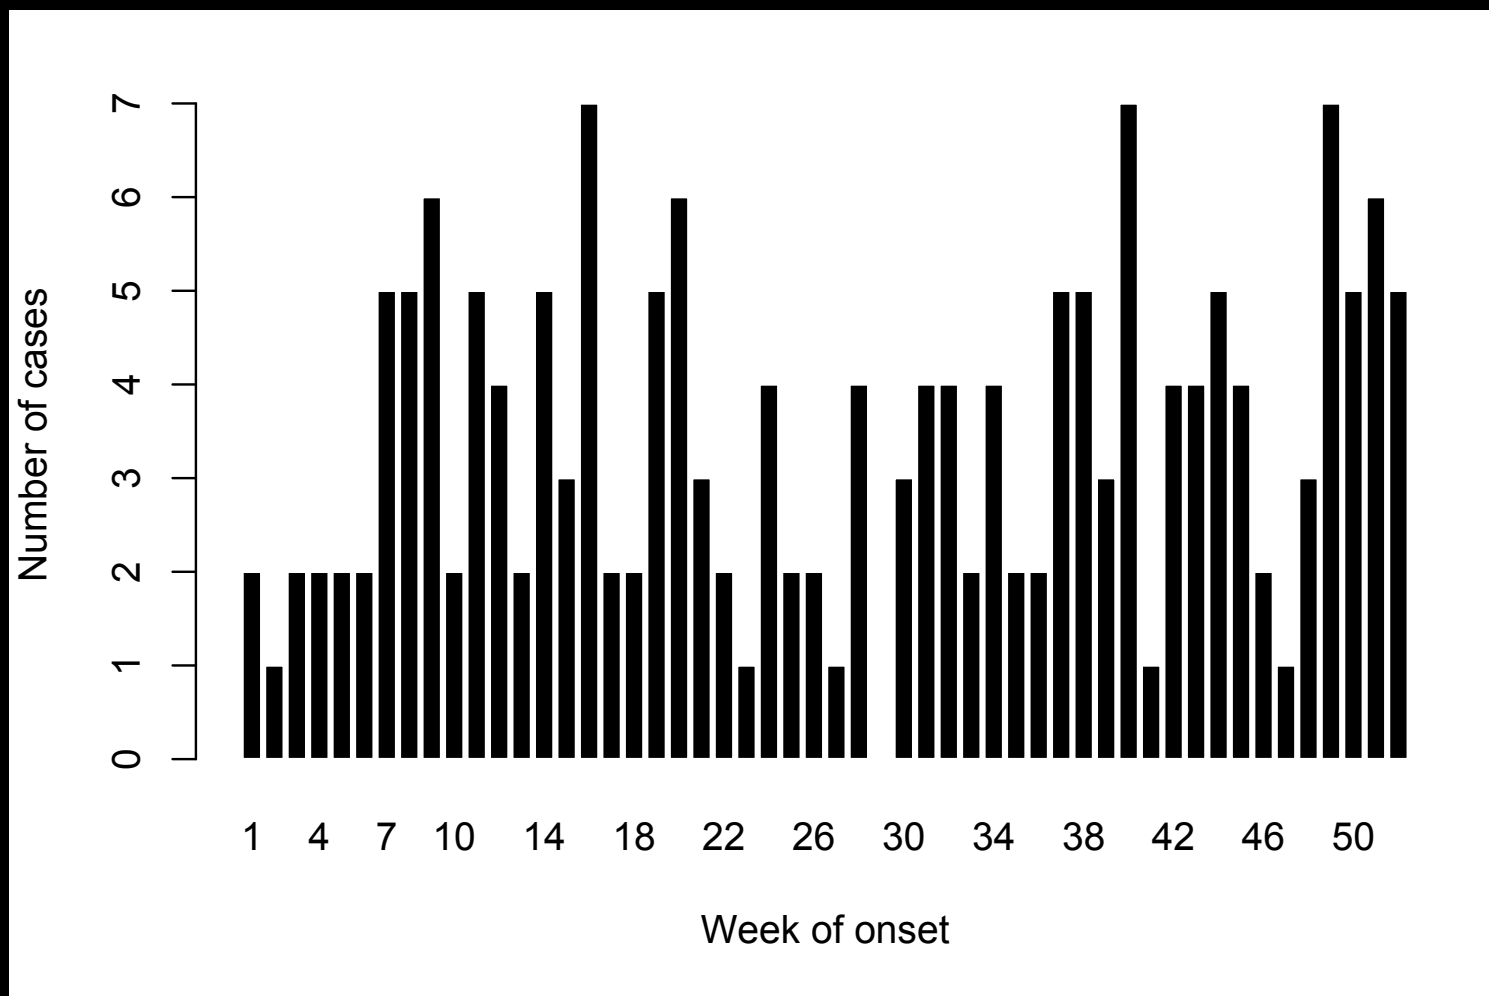

# Shoe-leather epidemiology

## Epidemic curves

Common source epidemics  
intermittent exposure

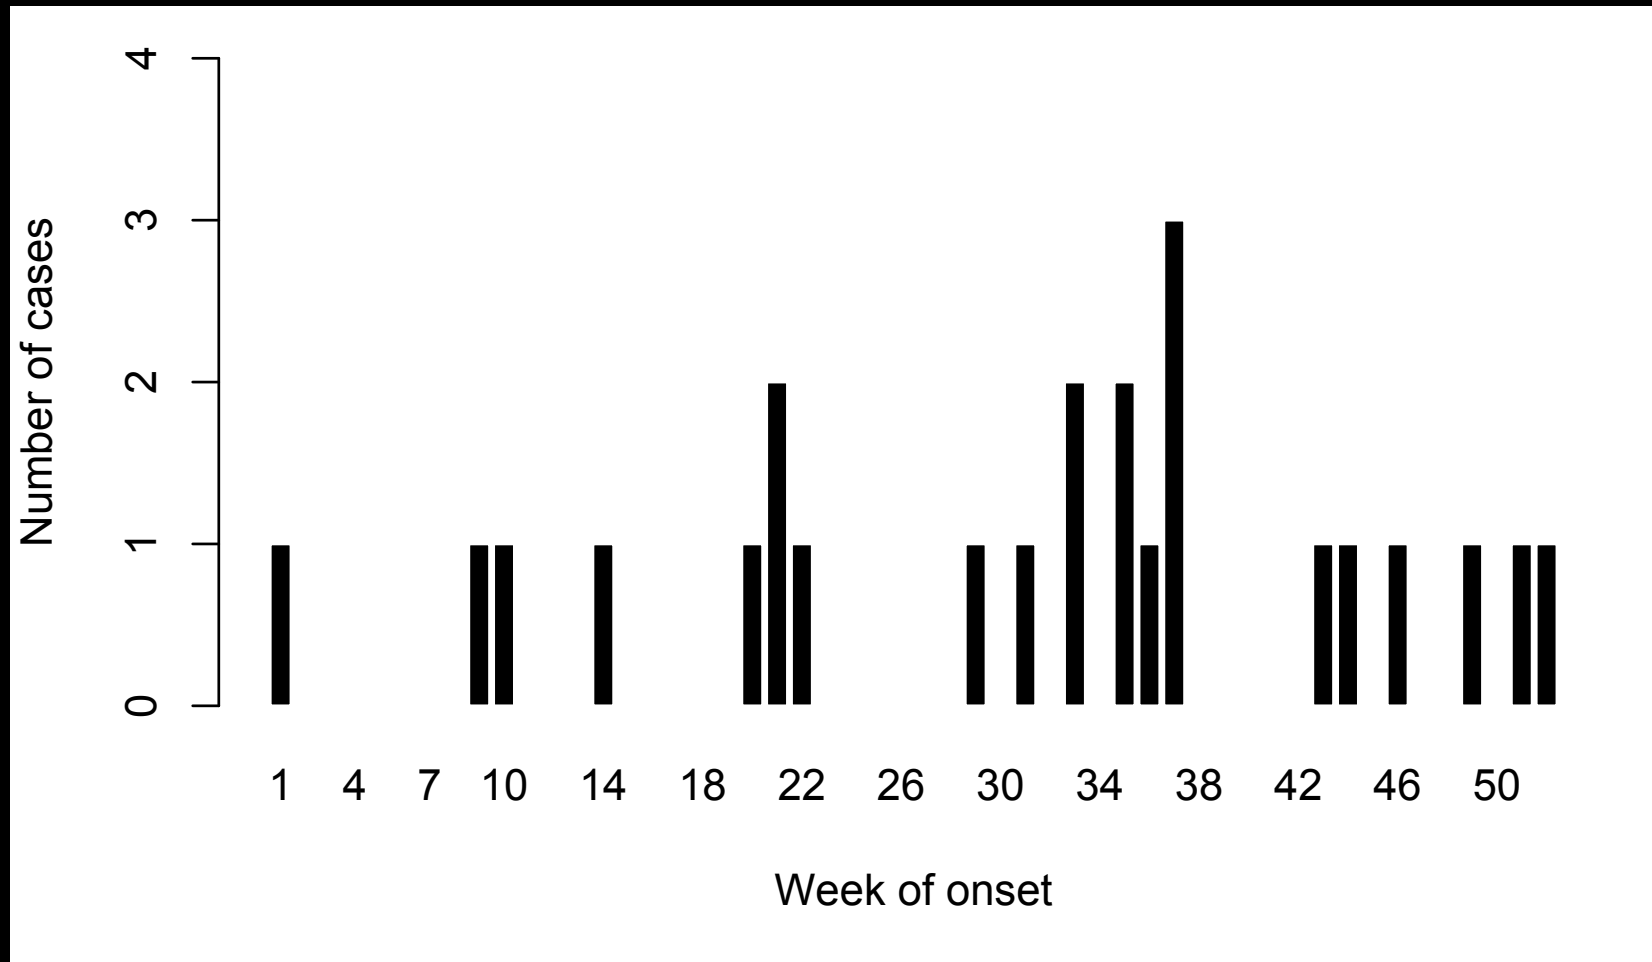

# Shoe-leather epidemiology

# Epidemic curves

## Propagated epidemics

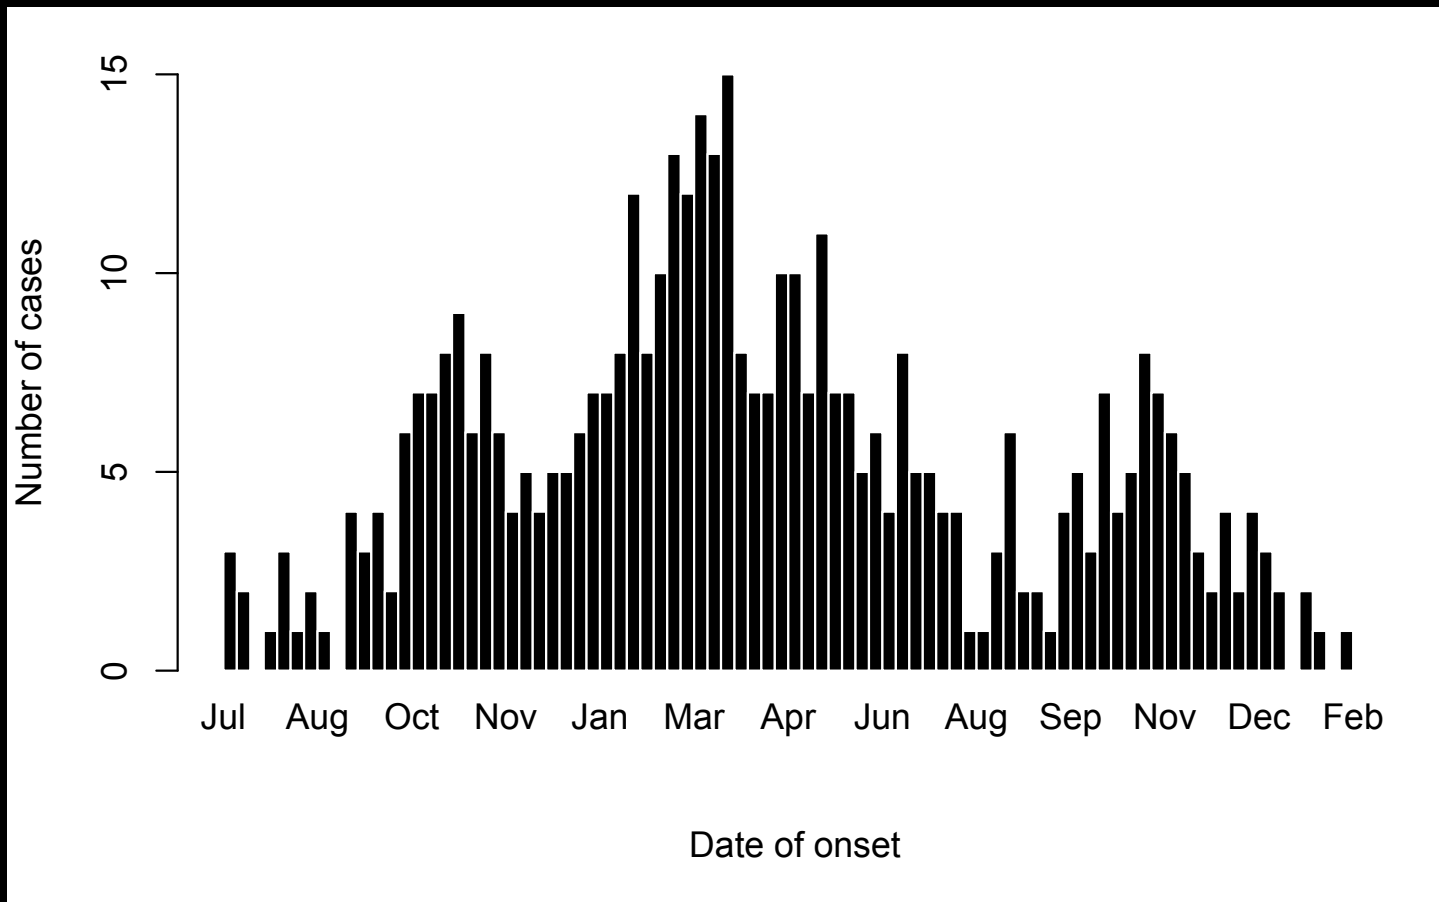

Simulated epidemic with  $R_0=1.2$  in a population of 1500 individuals

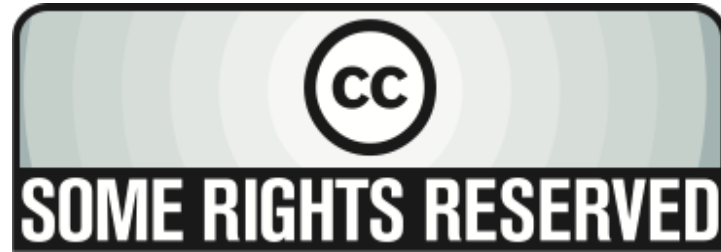

This presentation is made available through a Creative Commons Attribution license.  
Details of the license and permitted uses are available at  
<http://creativecommons.org/licenses/by-nc/3.0/>

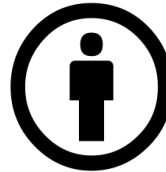

**© 2010 Dr. Juliet Pulliam**

Title: Introduction to Infectious Disease Dynamics, Part II

Attribution: Dr. Juliet Pulliam, Topics in Biomedical Sciences

Source URL: [http://lalashan.mcmaster.ca/theobio/mmed/index.php/Honours Course](http://lalashan.mcmaster.ca/theobio/mmed/index.php/Honours_Course)

For further information please contact Dr. Juliet Pulliam ([juliet.mmed.clinic@gmail.com](mailto:juliet.mmed.clinic@gmail.com)).

# Introduction to infectious disease dynamics II

Dr. Juliet Pulliam  
RAPIDD Program  
Division of International Epidemiology  
Fogarty International Center  
National Institutes of Health (USA)

Introduction to Biomedical Sciences  
BSc Honours Course in Biomathematics  
African Institute for the Mathematical Sciences  
Muizenberg, South Africa  
17 May 2010

# Infectious disease dynamics



## Traditional epidemiology

- Outbreak investigation
- Disease surveillance
- On-the-ground management

## Mathematical epidemiology

- General principles
- Explanation of patterns
- Prediction of spread and control
- Assessment of necessary data

# Infectious diseases

## Terminology

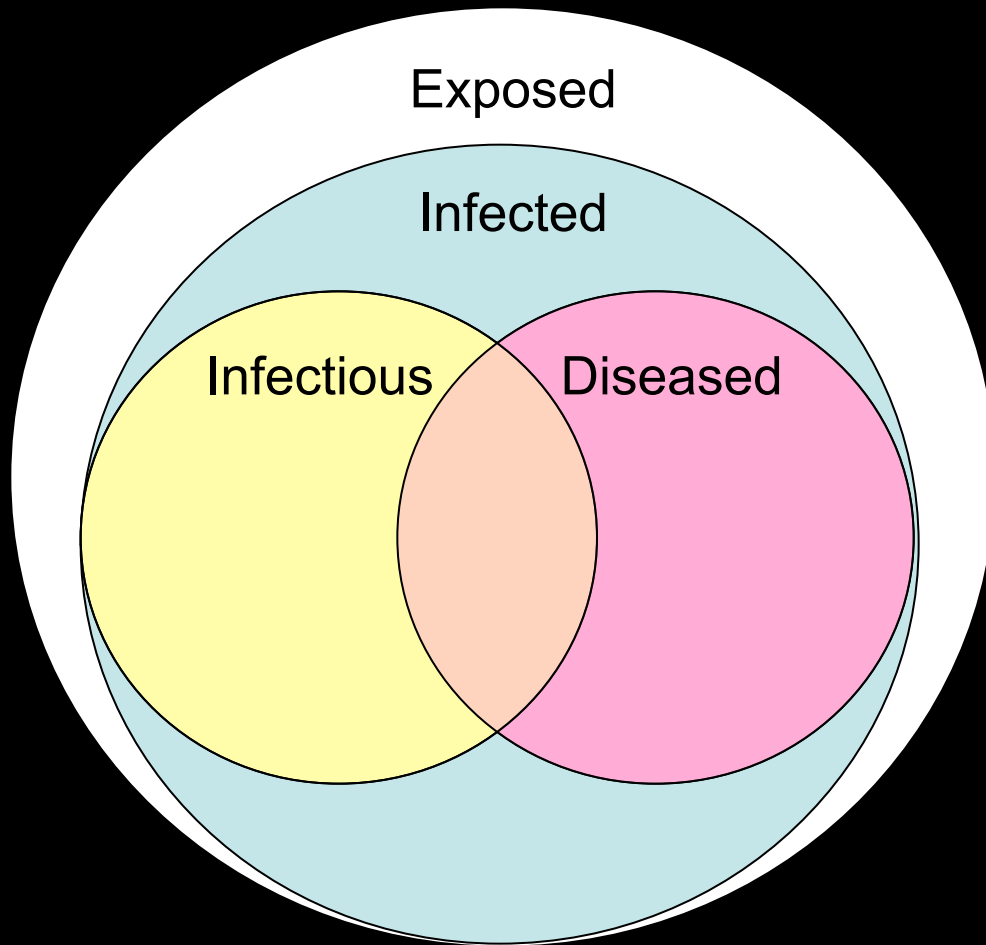

Infection

Onset of symptoms

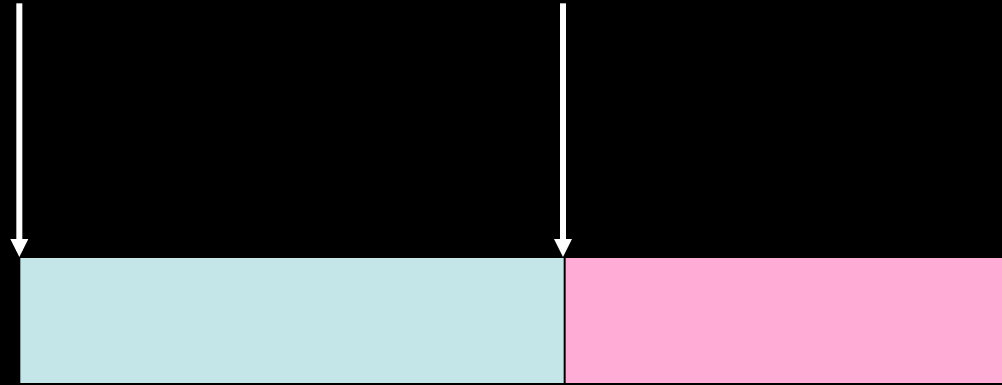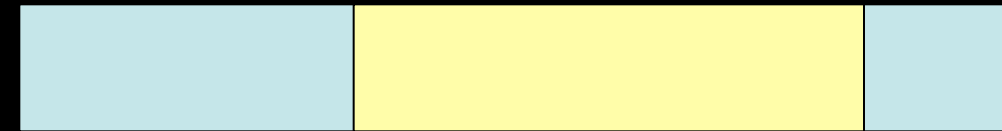

Onset of shedding

# Infectious diseases

## A simpler view of the world

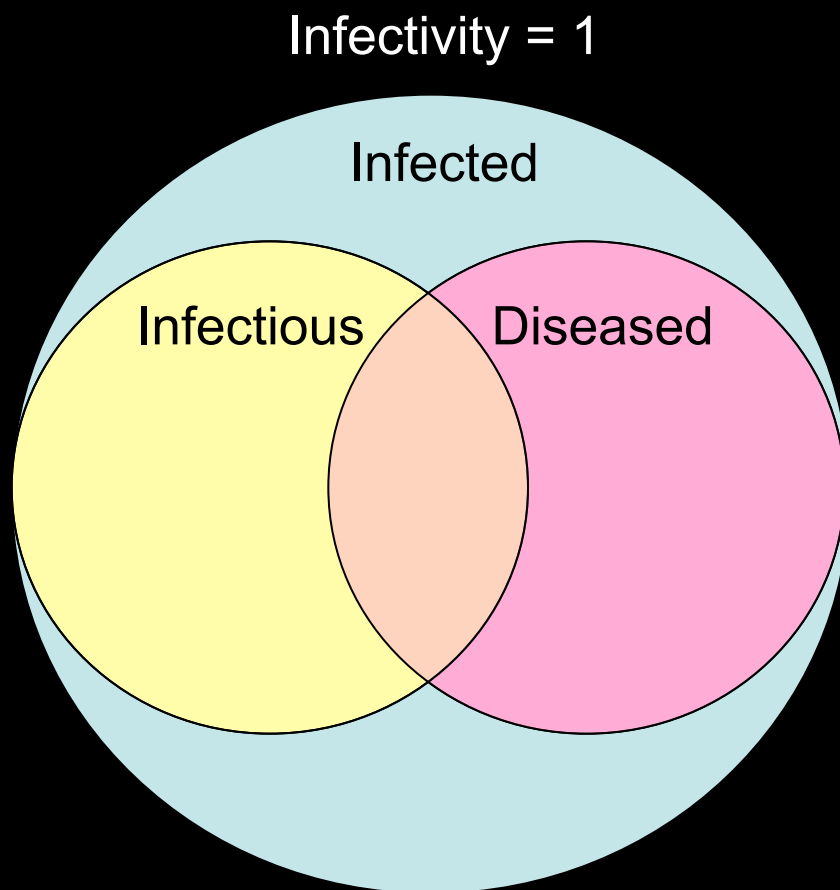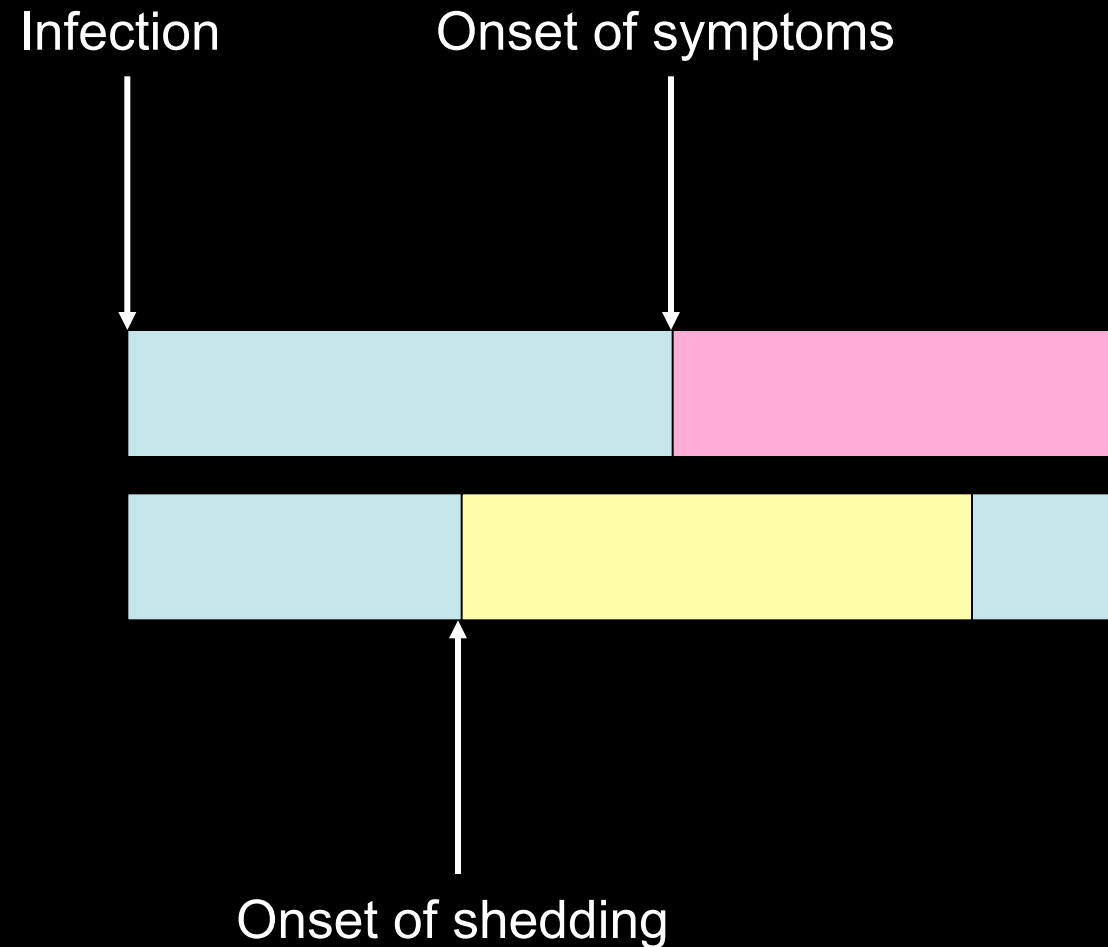

## Infectious diseases

# A simpler view of the world

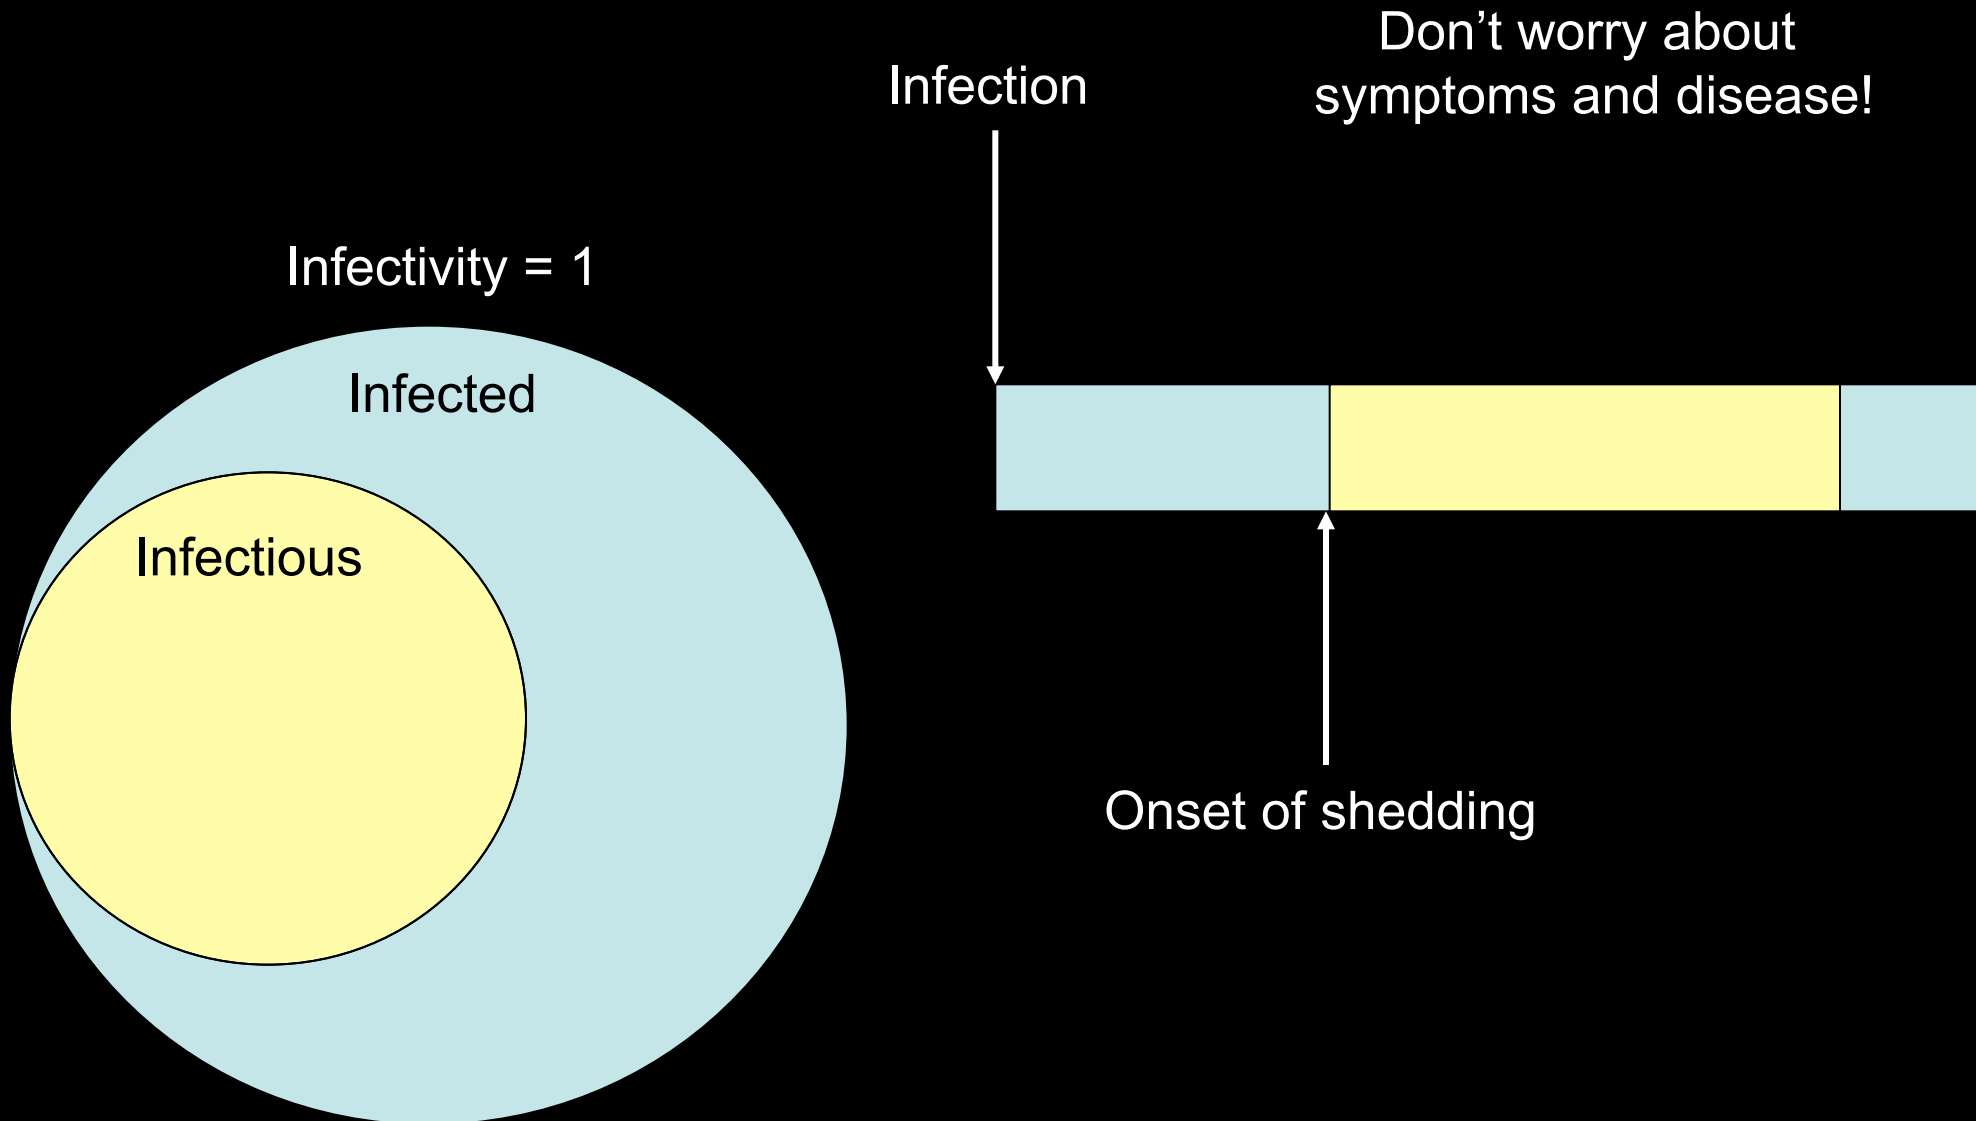

# much! Infectious diseases

## A simpler view of the world

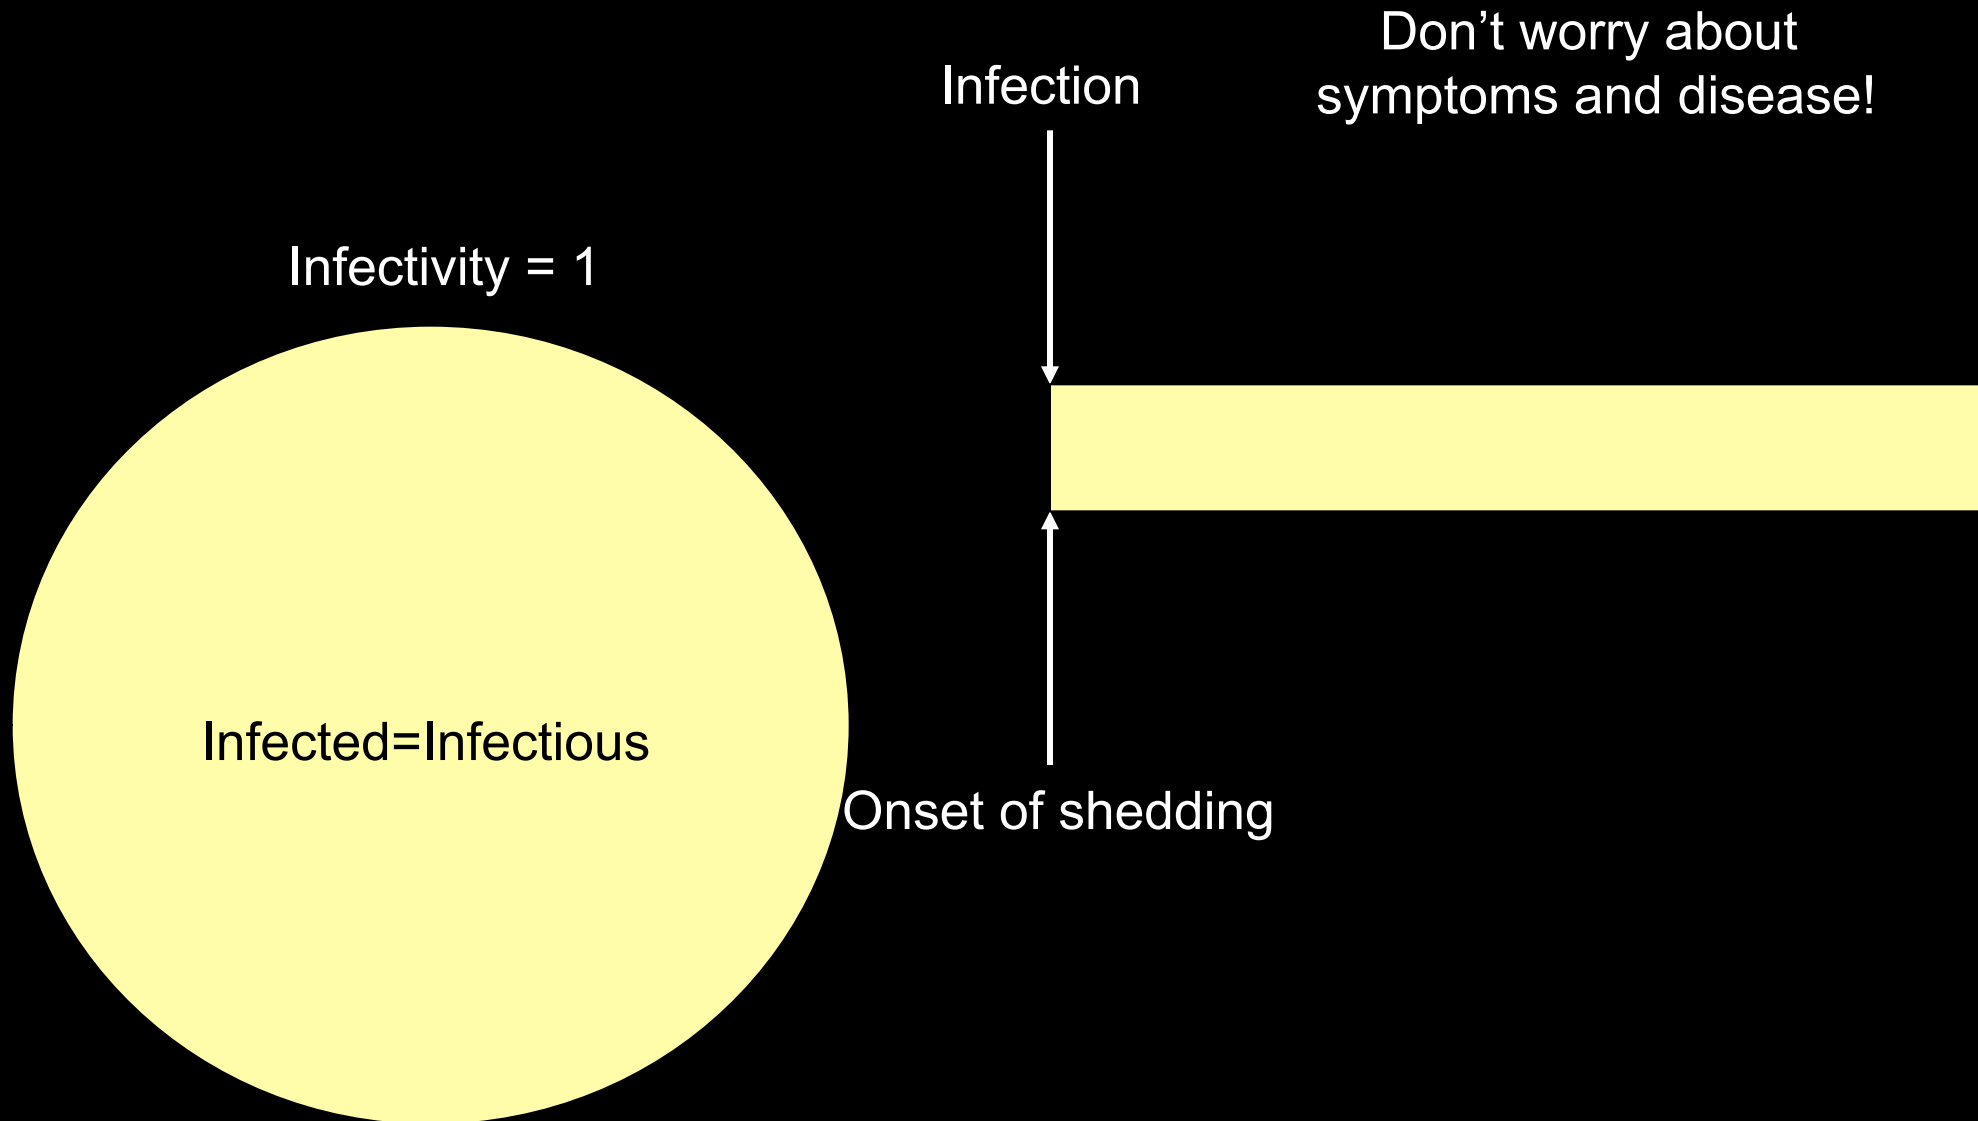

Infectious diseases

**much!**  
A simpler view of the world

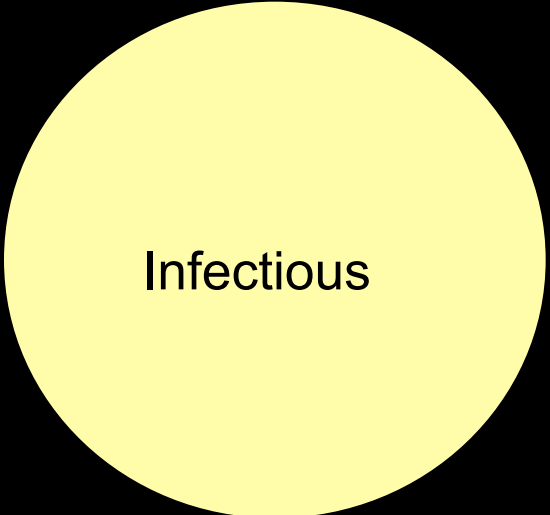

Infectious

Infectious diseases

# A simple view of the world



The diagram consists of three large, horizontally aligned circles on a black background. The leftmost circle is light blue and contains the word 'Susceptible'. The middle circle is yellow and contains the word 'Infectious'. The rightmost circle is light purple and contains the word 'Recovered'. All text is in a white, sans-serif font.

Susceptible

Infectious

Recovered

Infectious diseases

# A simple view of the world

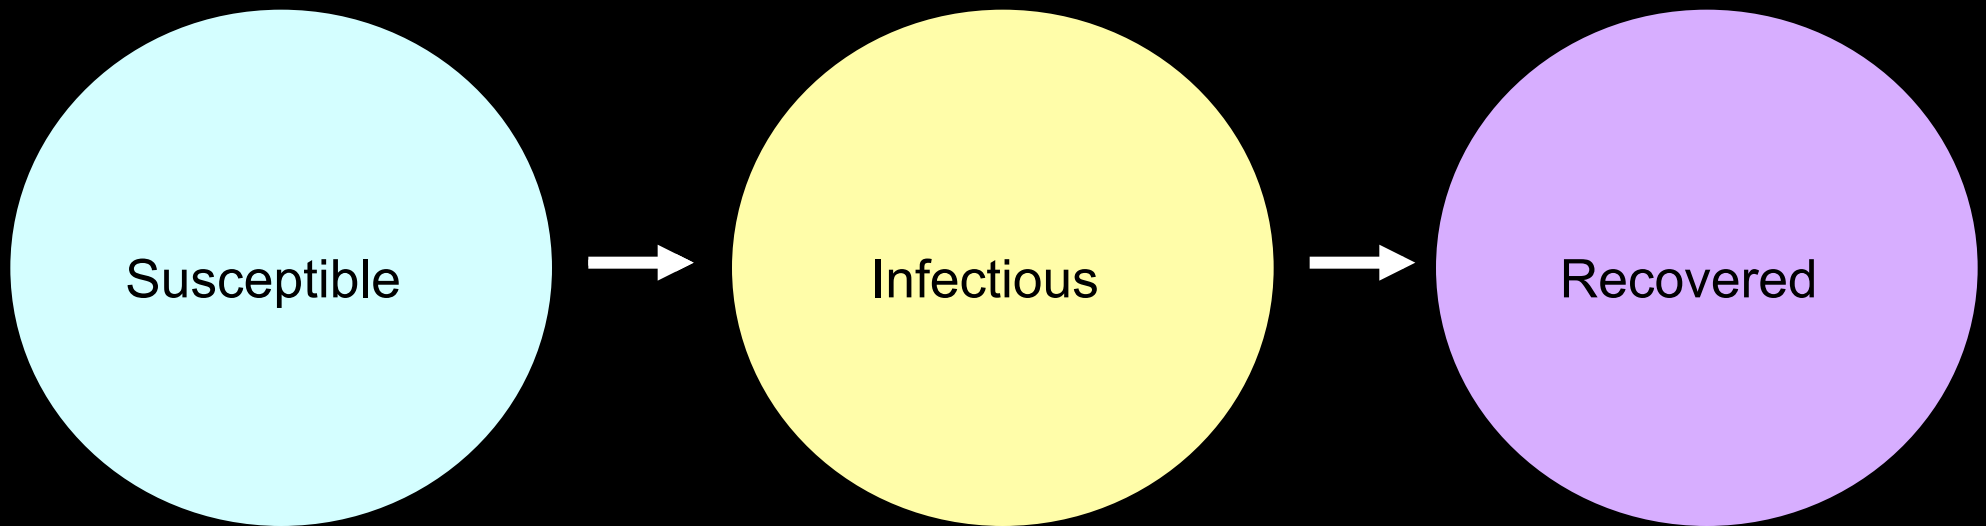

Infectious diseases

# A simple view of the world

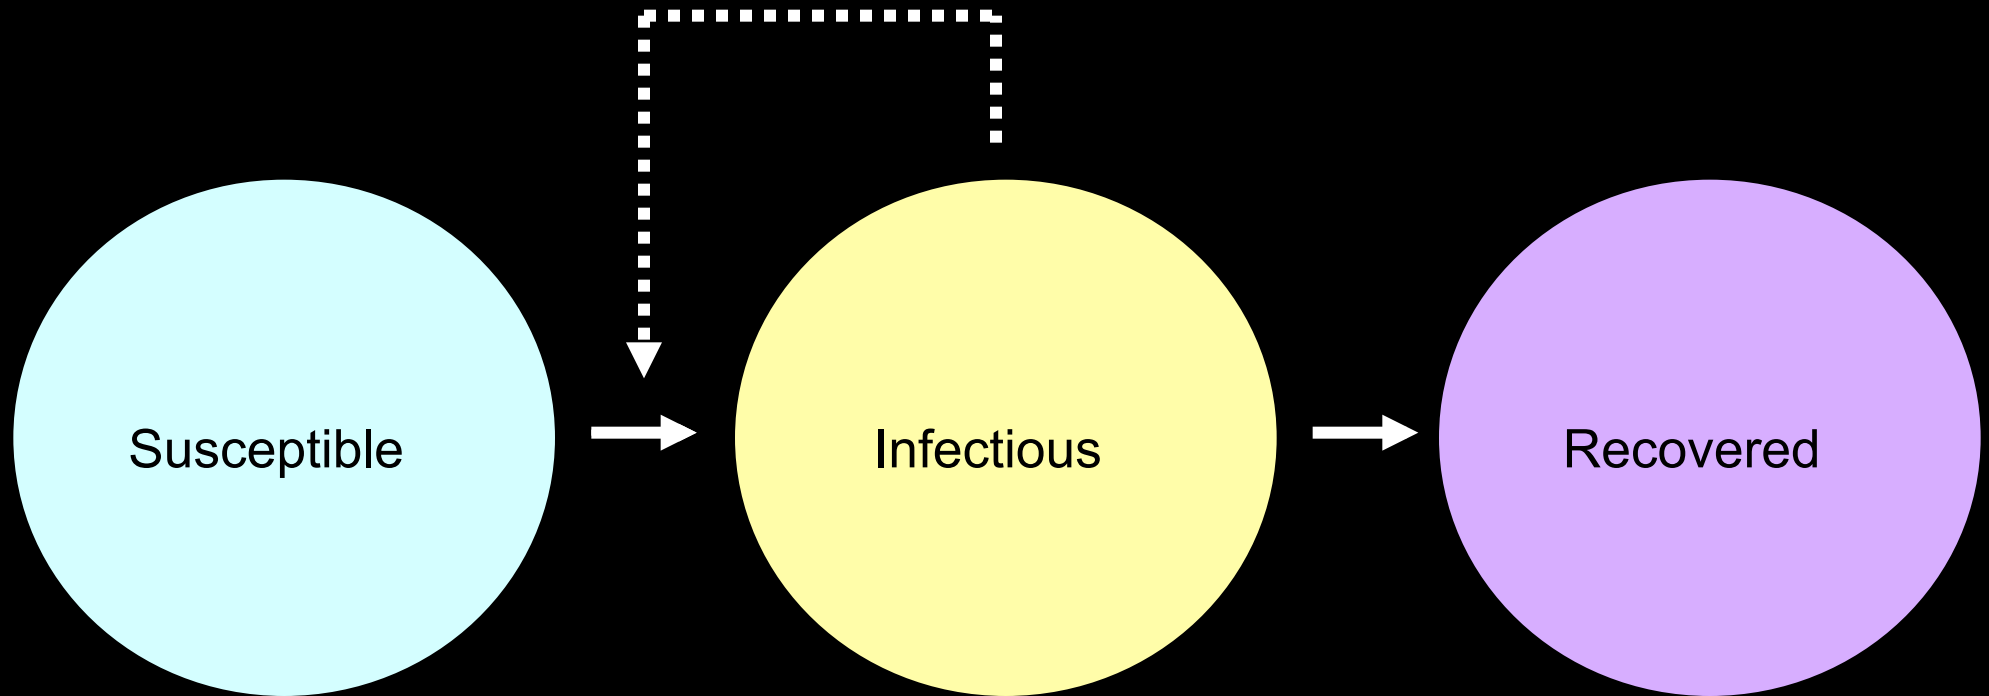

Infectious diseases

# Health-related states



Infectious diseases

# State variables

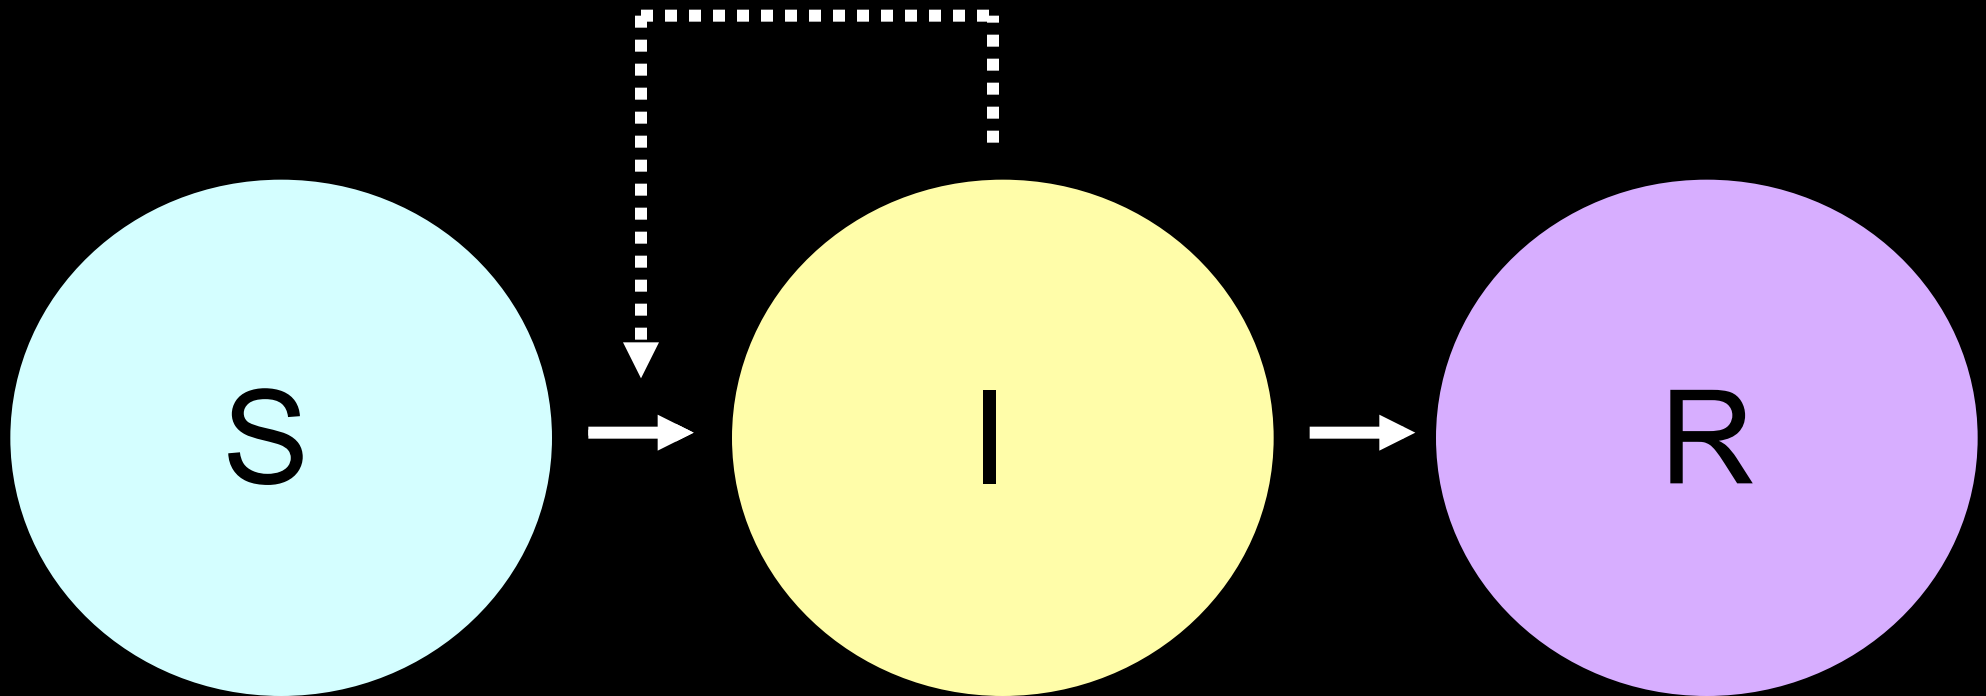

Infectious diseases

# Transition rates

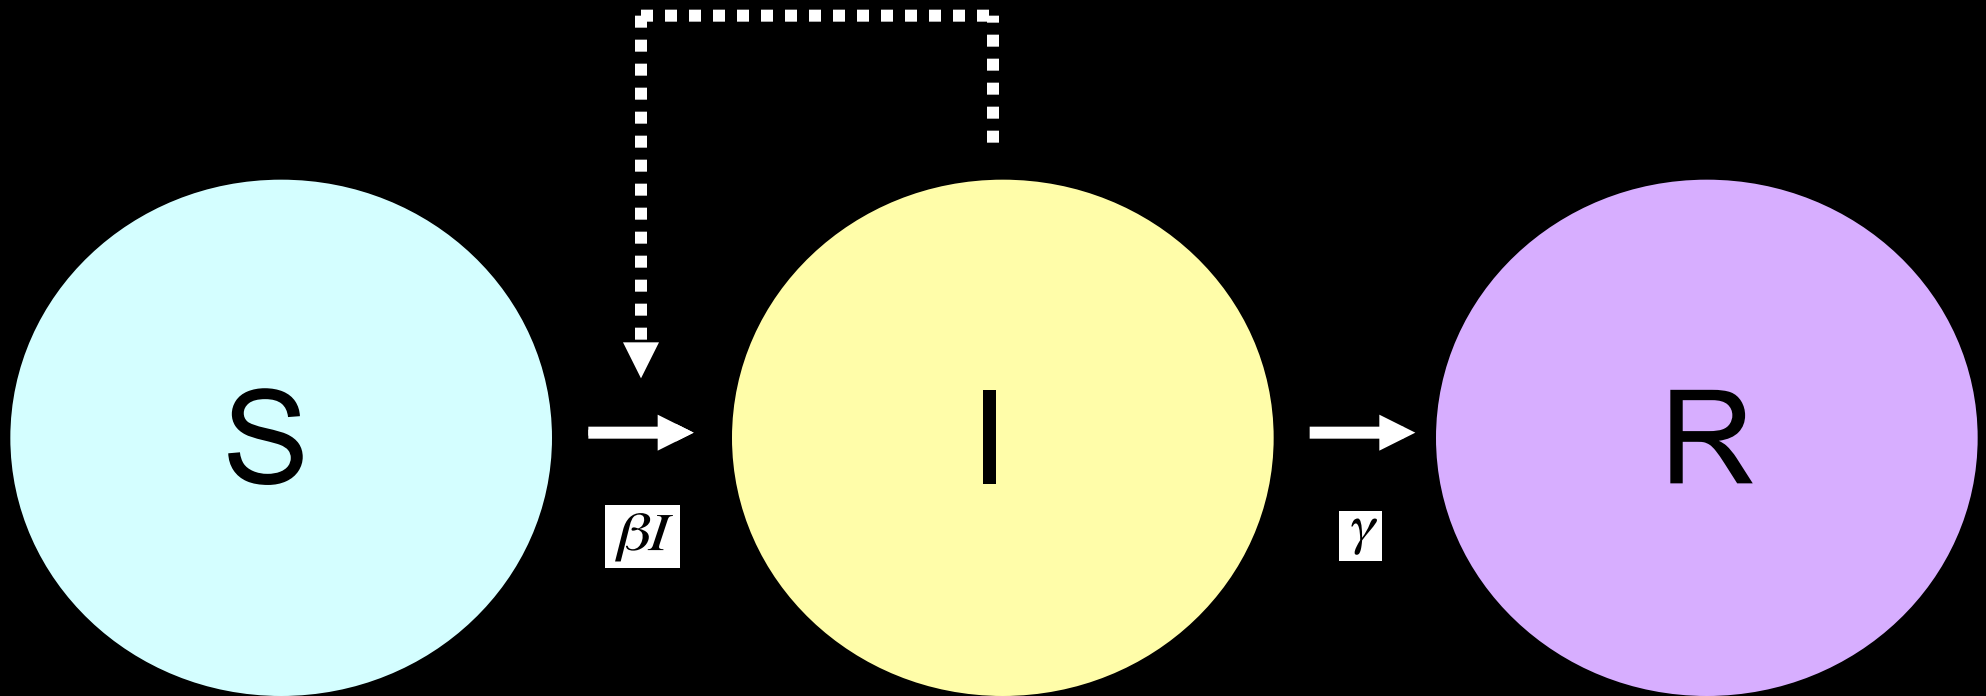

## Infectious diseases

# A simple disease model

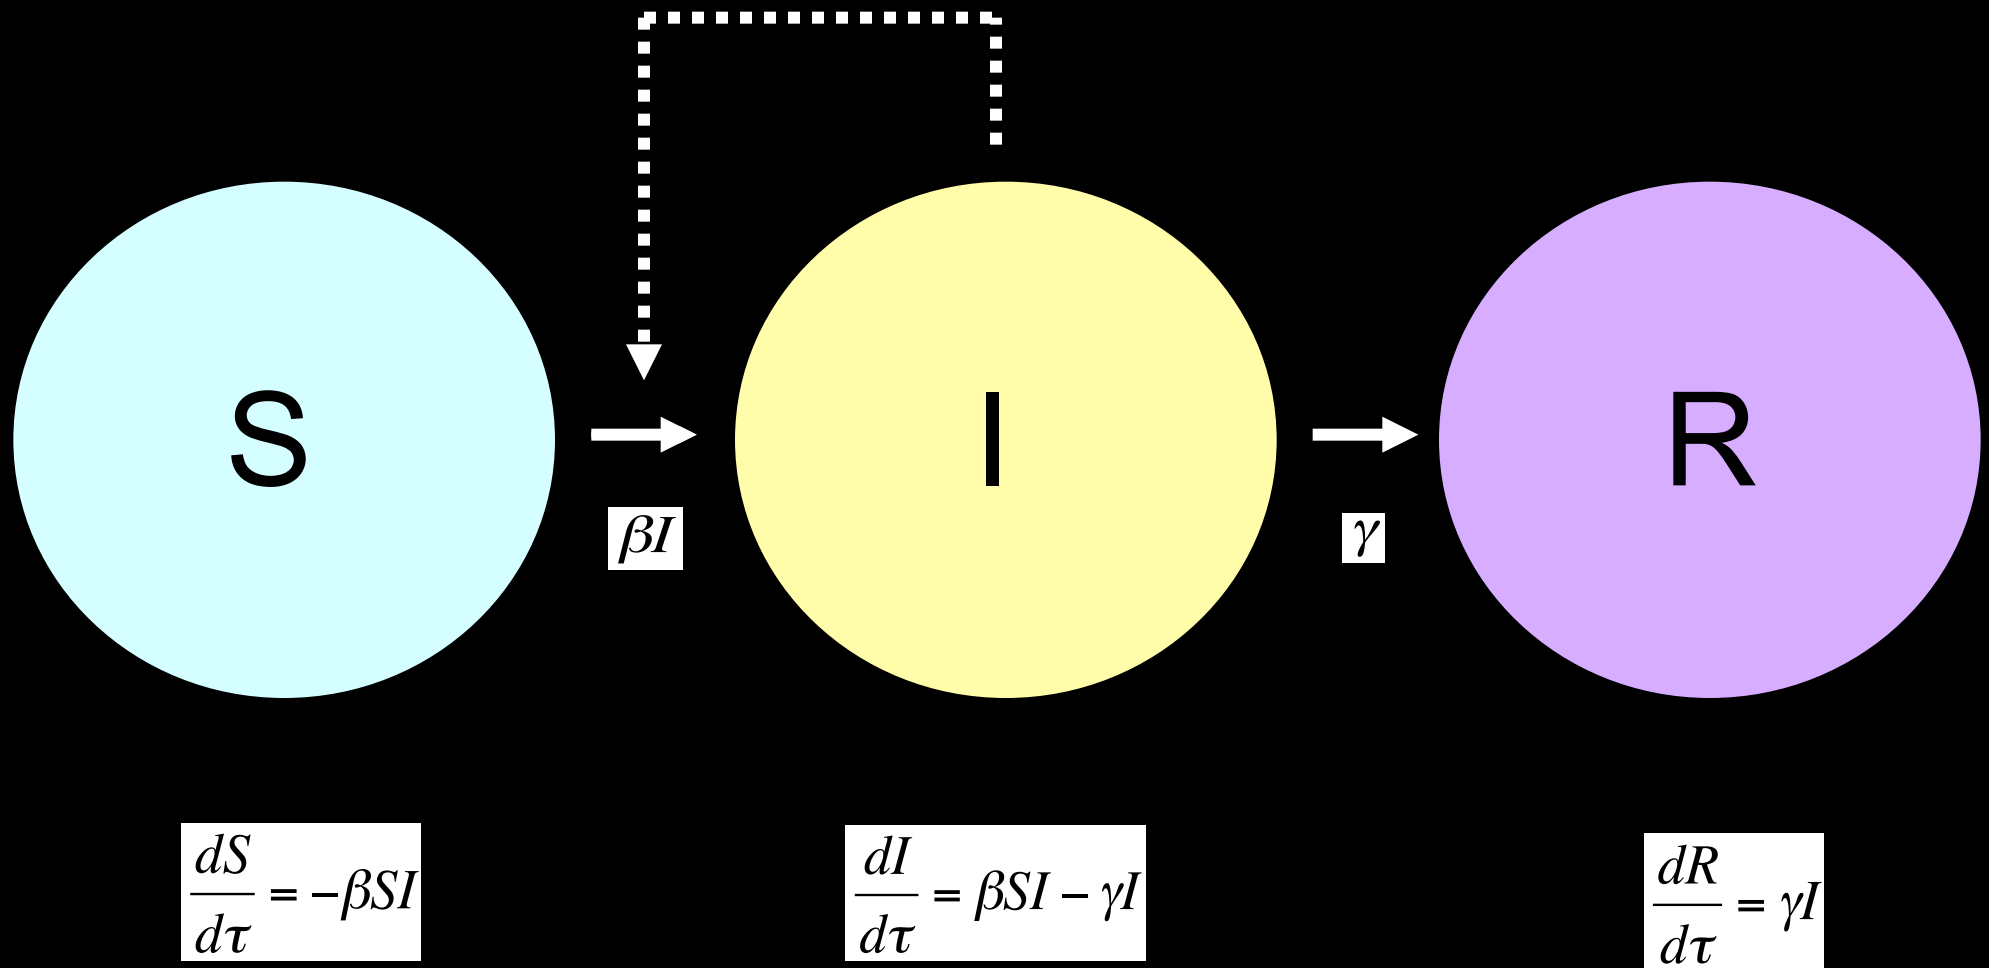

## Infectious diseases

# A simple disease model

$$N = S + I + R$$

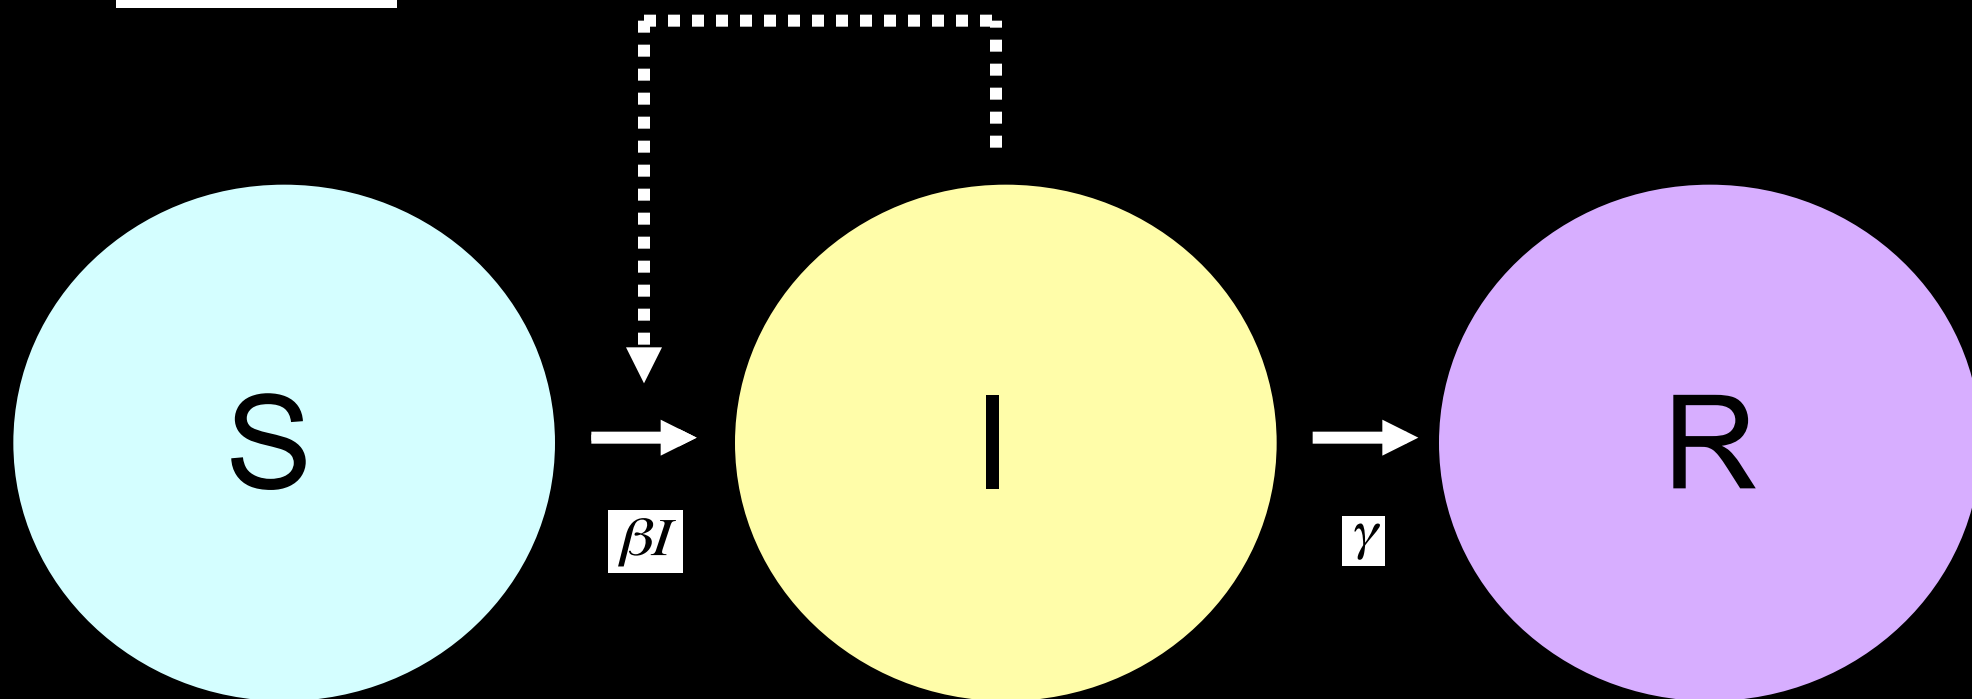

$$\frac{dS}{d\tau} = -\beta SI$$

$$\frac{dI}{d\tau} = \beta SI - \gamma I$$

$$\frac{dR}{d\tau} = \gamma I$$

## Infectious diseases

# A simple disease model

$$N = S + I + R$$

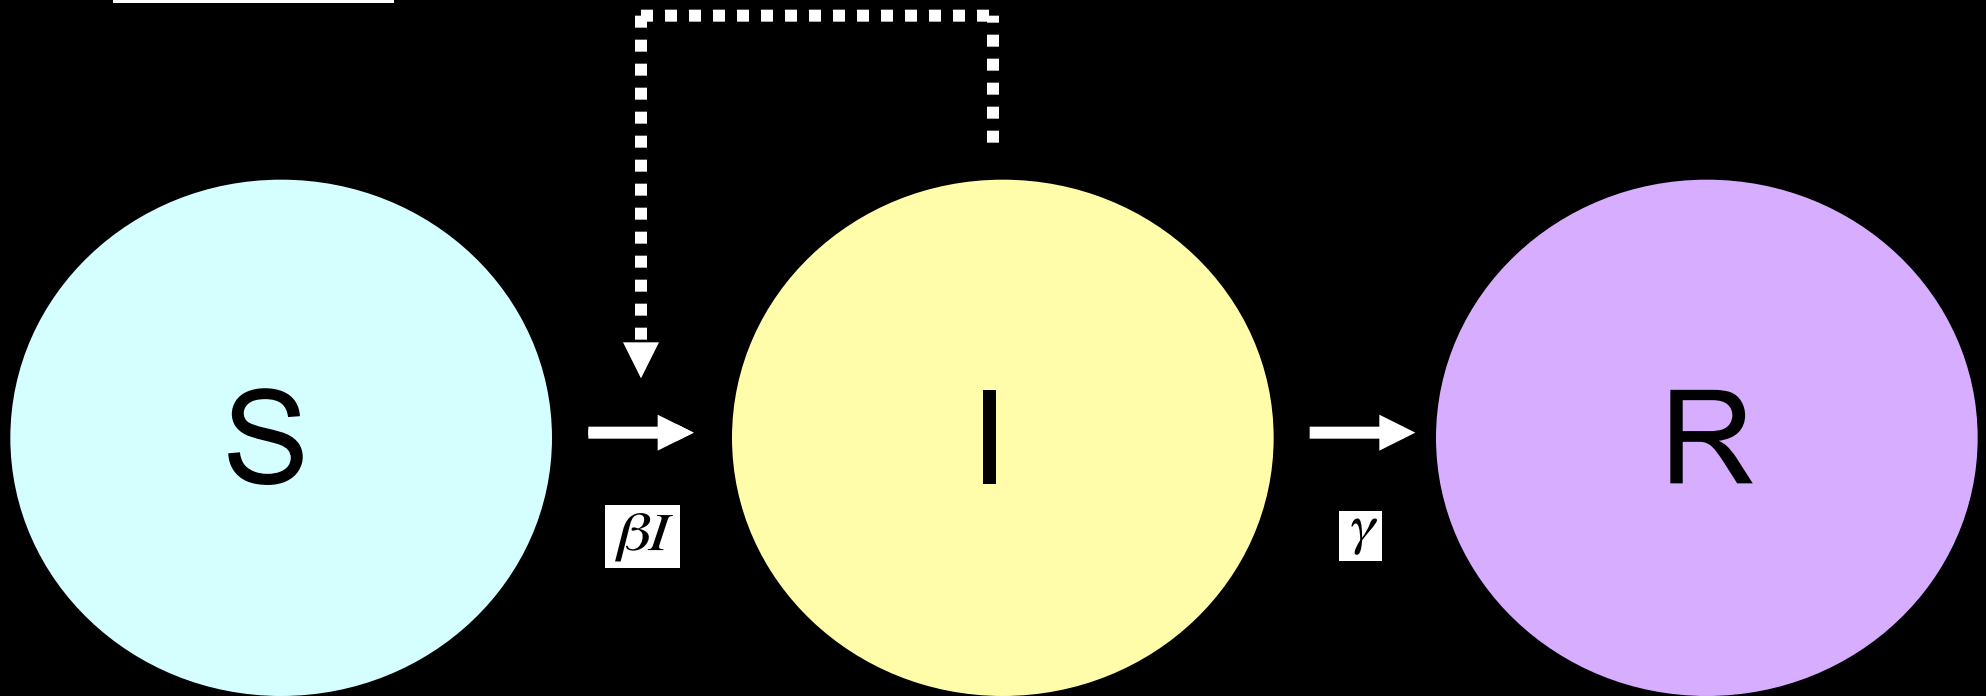

$$\frac{dS}{dt} = -\frac{\beta SI}{\gamma}$$

$$\frac{dI}{dt} = \frac{\beta SI}{\gamma} - I$$

$$\frac{dR}{dt} = I$$

## Infectious diseases

# A simple disease model

$$N = S + I + R$$



$$\frac{dS}{dt} = -\frac{\beta SI}{\gamma}$$

$$\frac{dI}{dt} = \frac{\beta SI}{\gamma} - I$$

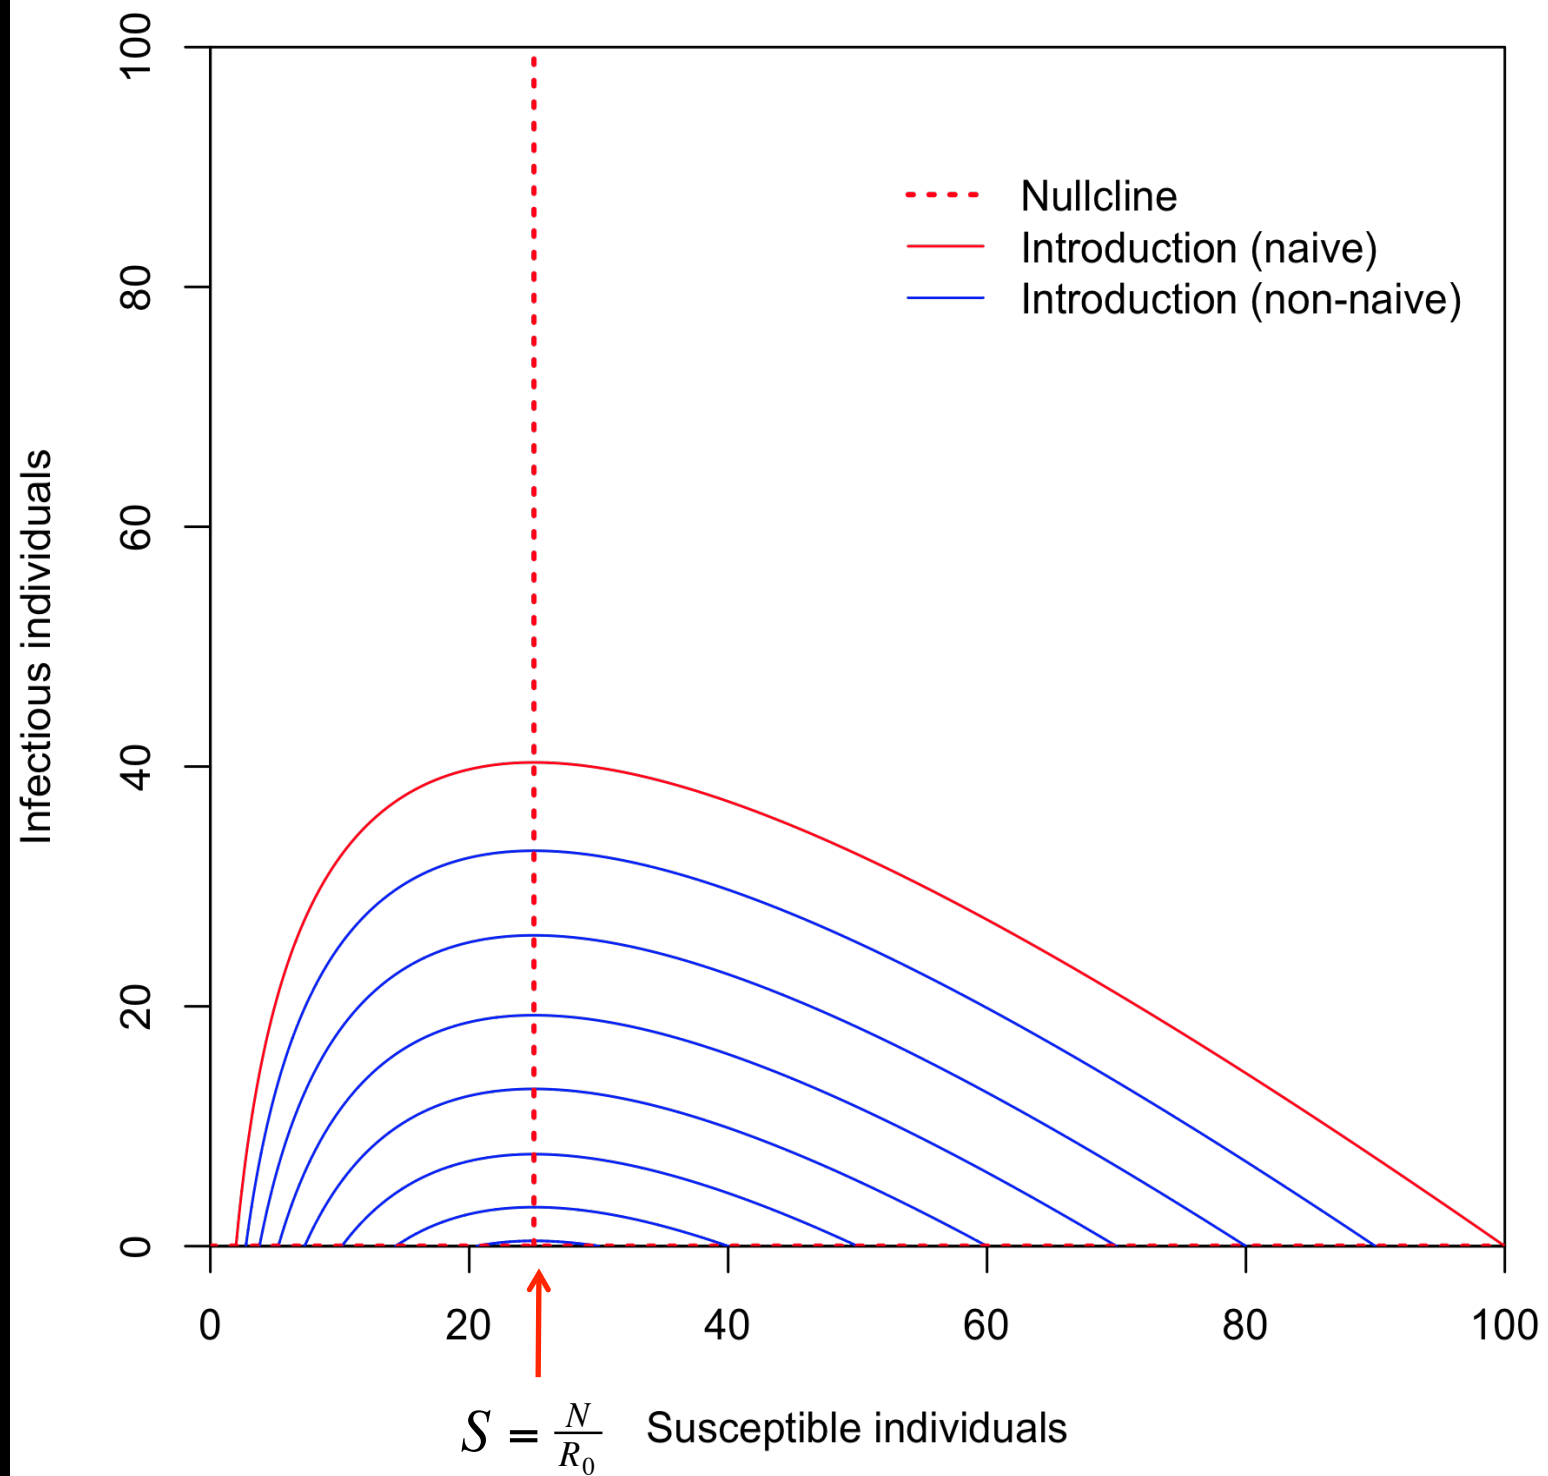

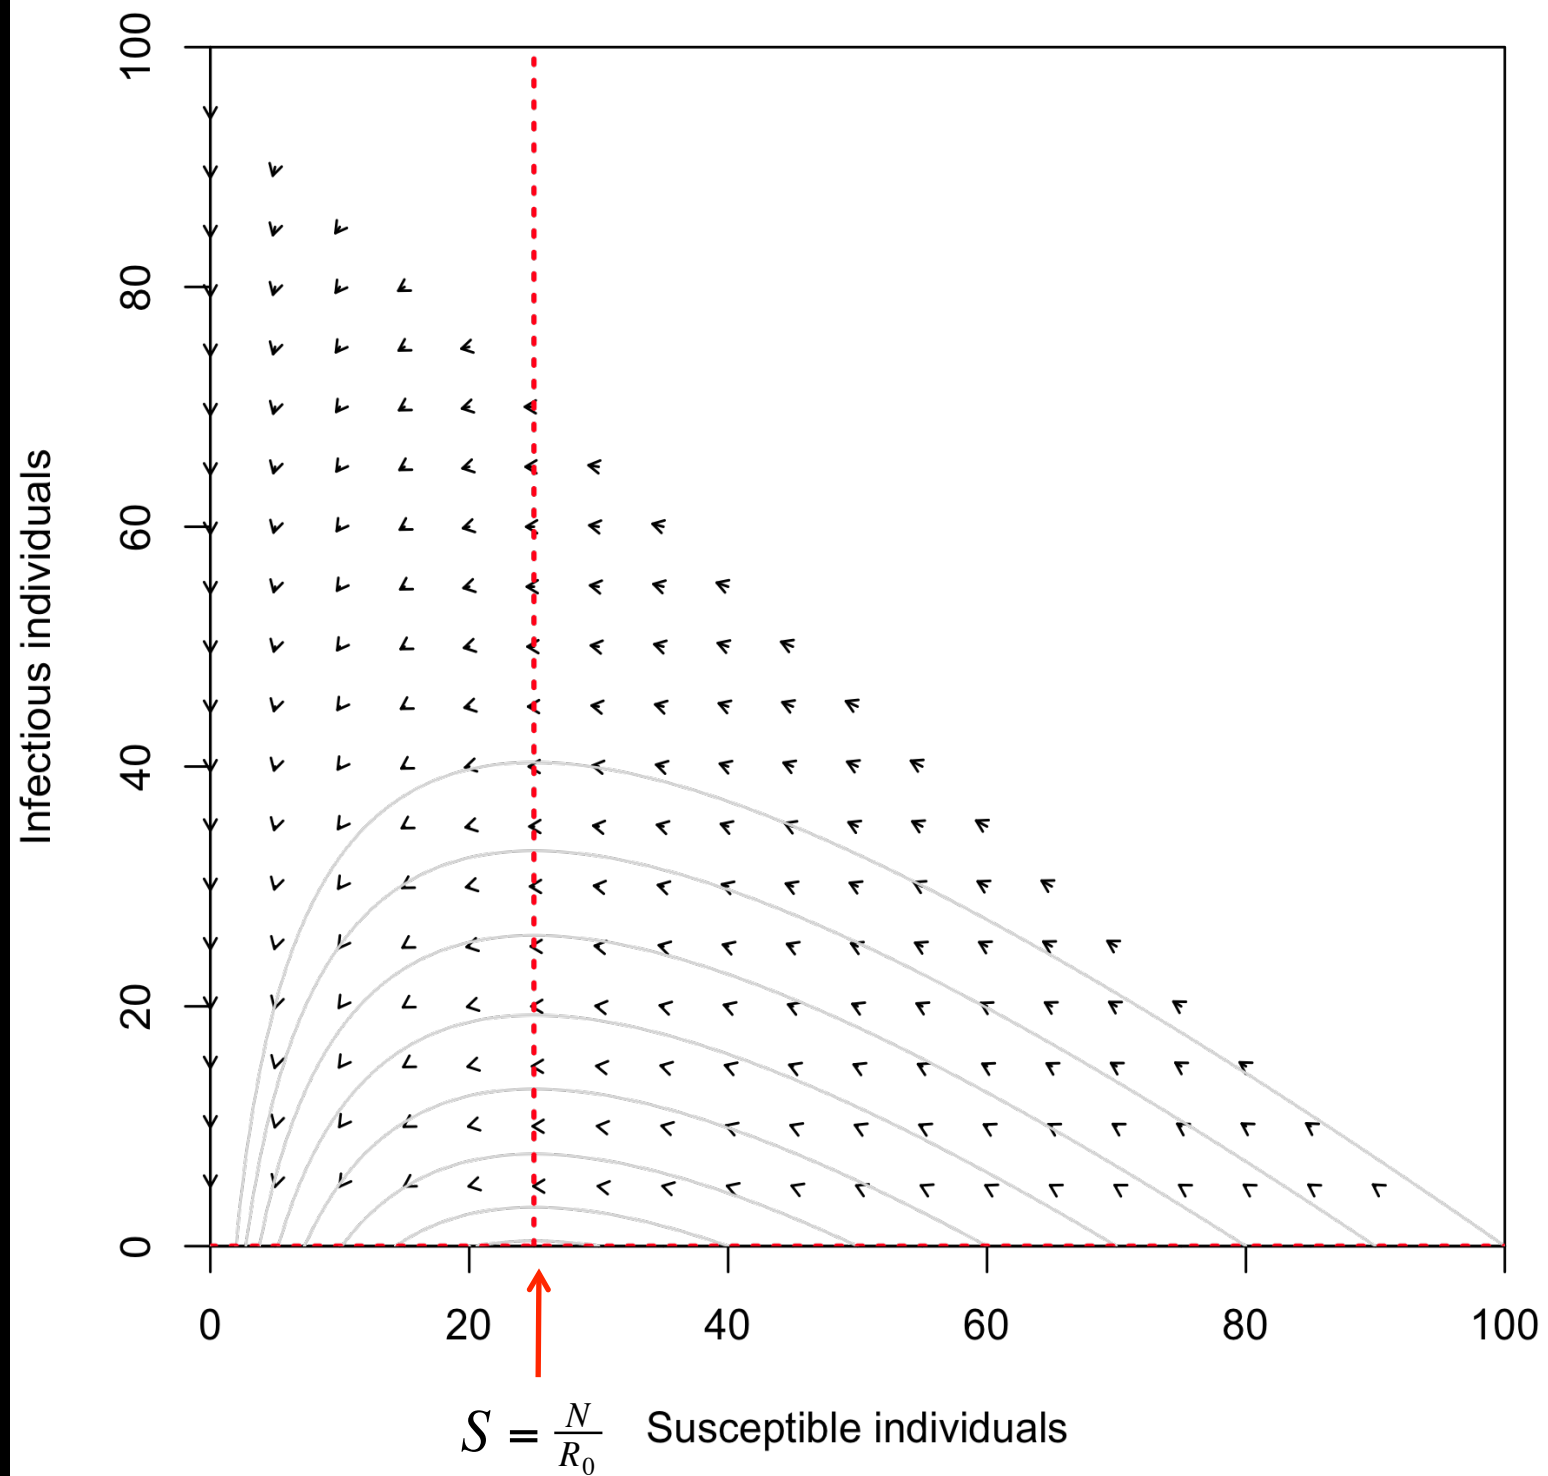

Supplement: S8 (10.1371/journal.pbio.1001295.s008) [file journal.pbio.1001295.s008]
