# Supplementary material for: How to Make Epidemiological Training Infectious
Source: PLOS journal article supplement (doi:10.1371/journal.pbio.1001295), 2012-04-03
Supplement: S13 (10.1371/journal.pbio.1001295.s013) [file journal.pbio.1001295.s013]

# Introduction to Likelihood

Meaningful Modeling of Epidemiologic Data, 2011  
AIMS, Muizenberg, South Africa

Steve Bellan  
MPH Epidemiology  
PhD Candidate  
Department of Environmental Science, Policy & Management  
University of California at Berkeley

In a population of 1,000,000 people with a true prevalence of 30%, the probability distribution of number of positive individuals if 100 are sampled:

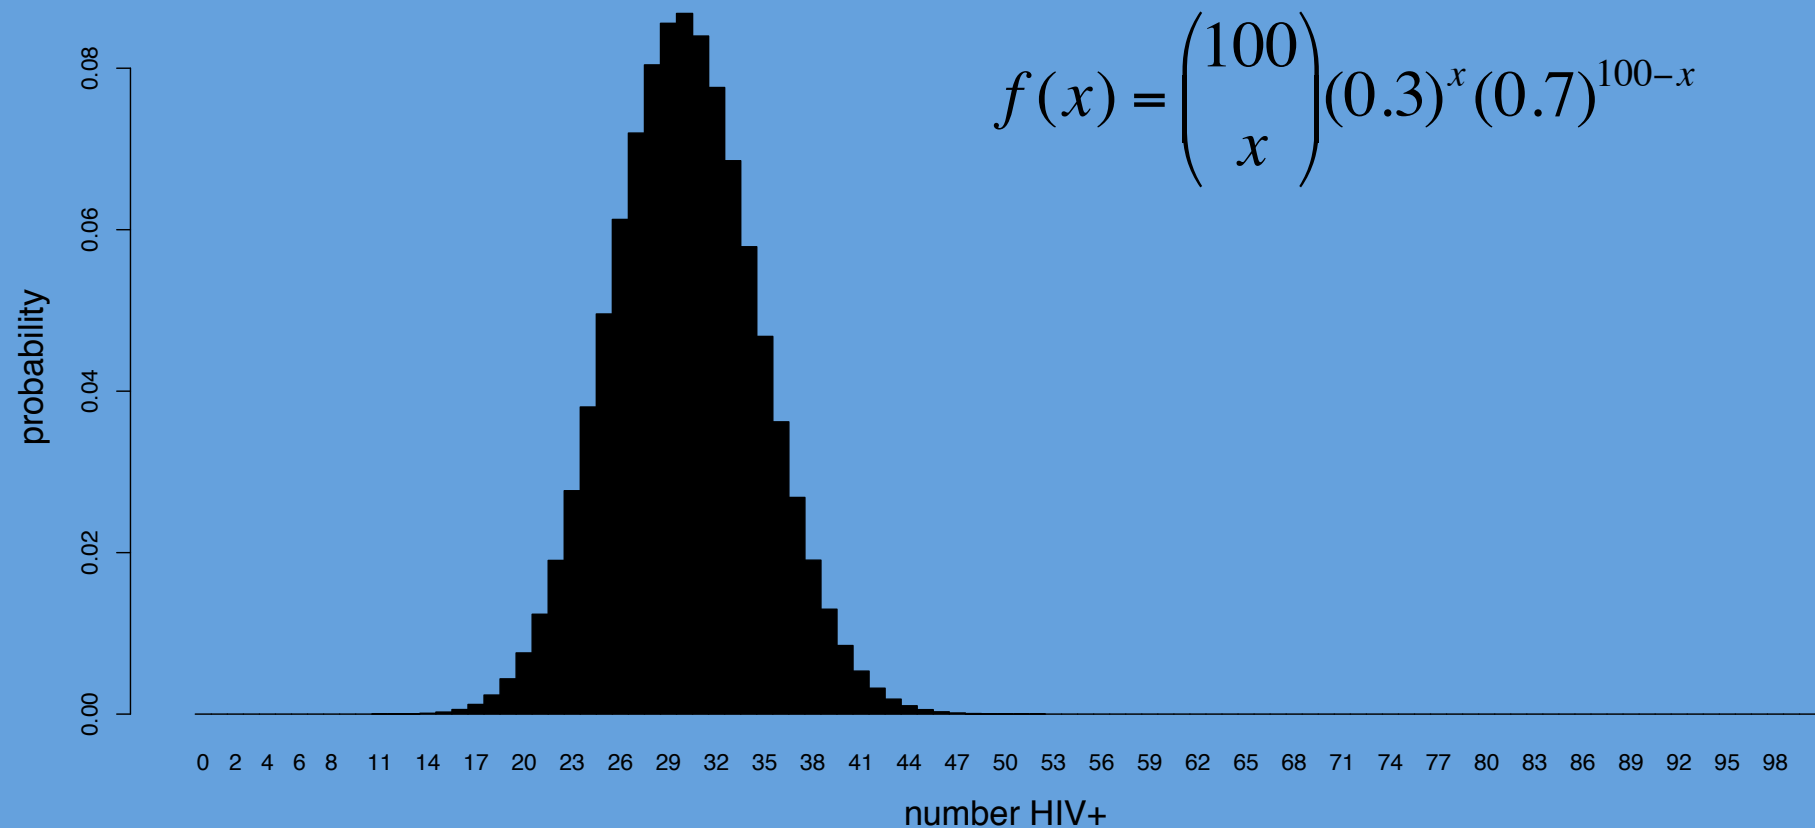

```
barplot(dbinom(x = 0:100, size = 100, prob = .3), names.arg = 0:size)
```

In a population of 1,000,000 people with a true prevalence of 30%, the probability distribution of number of positive individuals if 100 are sampled:

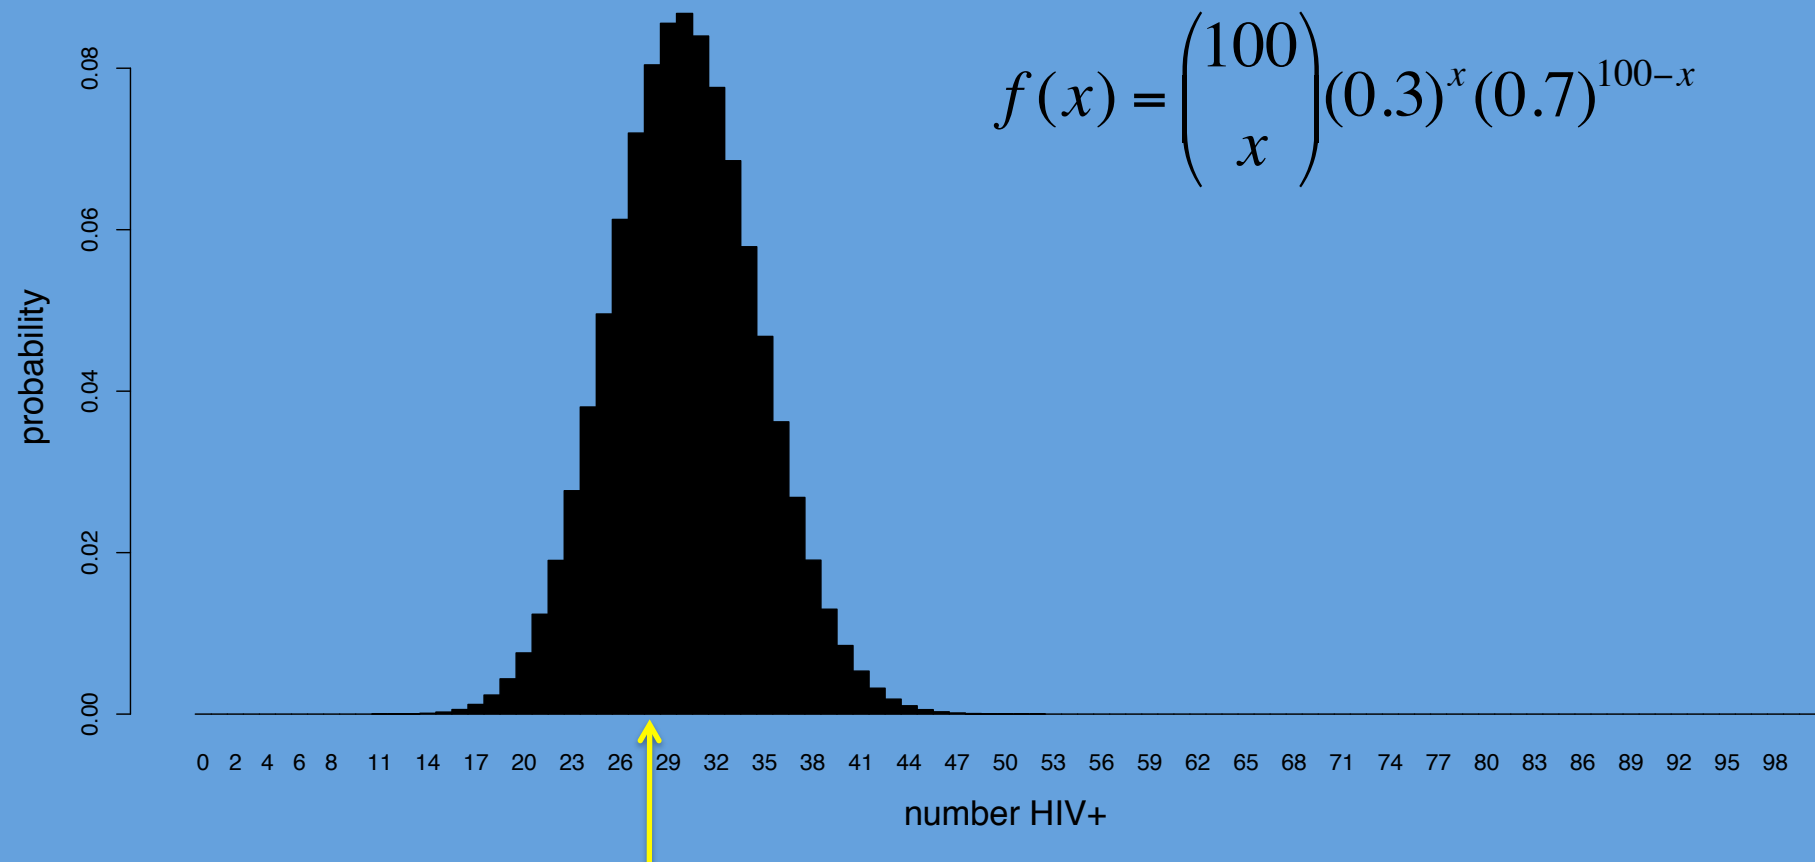

$$f(x) = \binom{100}{x} (0.3)^x (0.7)^{100-x}$$

We sample 100 people once and 28 are positive:

```
> rbinom(n = 1, size = 100, prob = .3)
[1] 28
```

We don't know the true prevalence!

But we can calculate the probability of  
28 or a more extreme value occurring  
for a given prevalence.

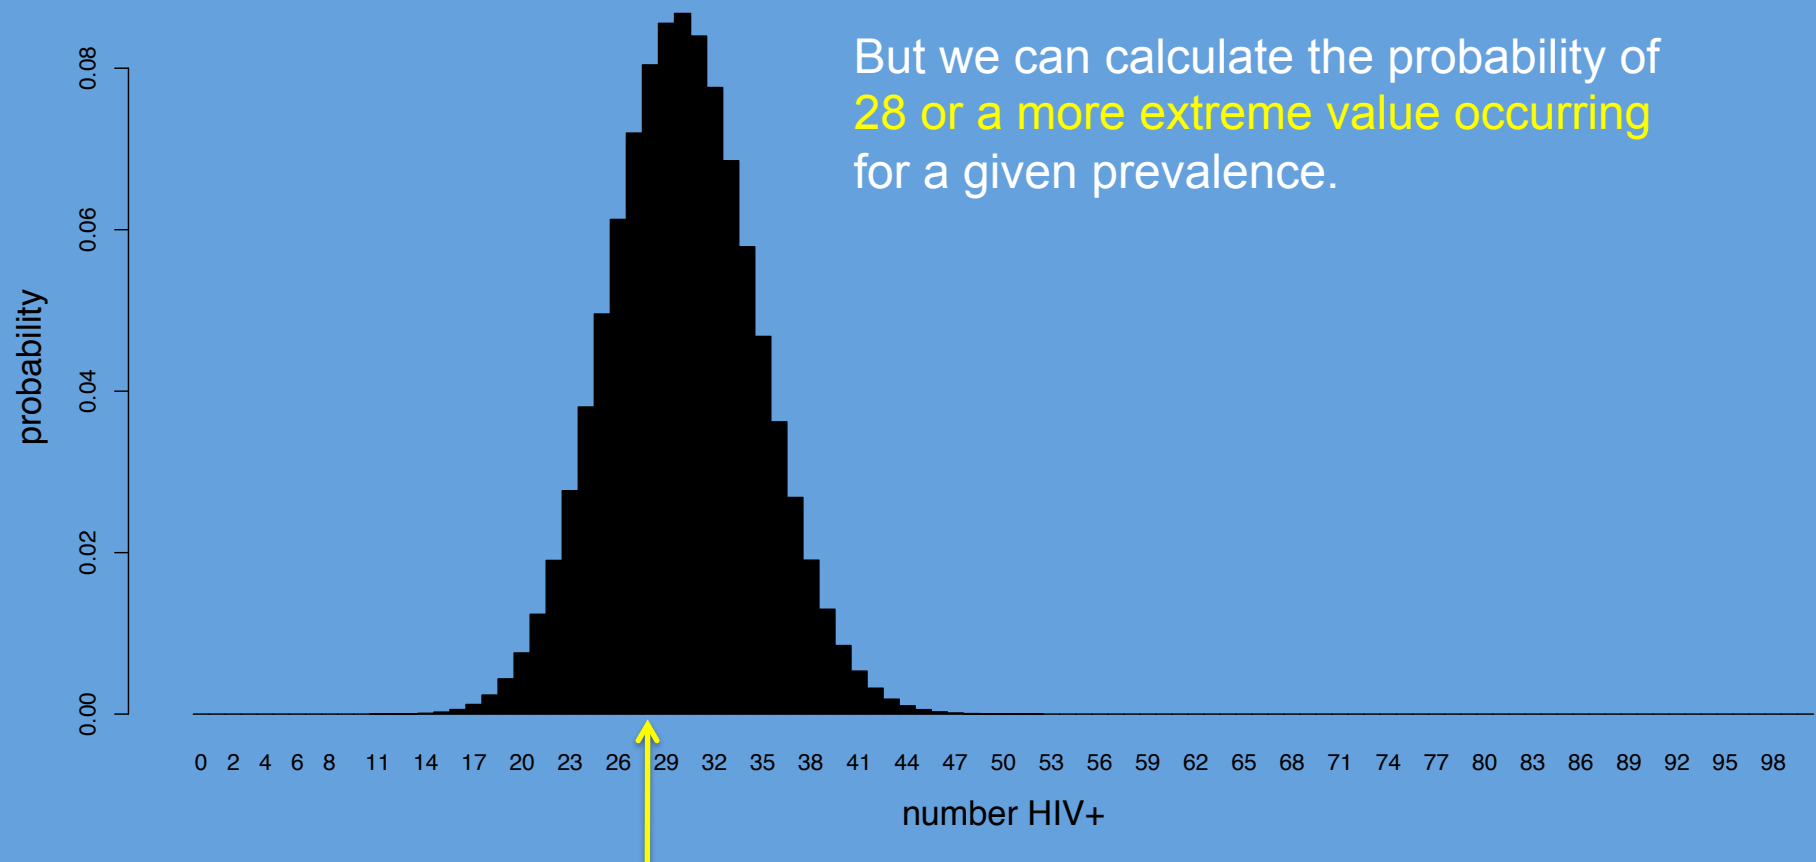

We sample 100 people once and 28 are positive:

```
> rbinom(n = 1, size = 100, prob = .3)  
[1] 28
```

# Cumulative Probability & P Values

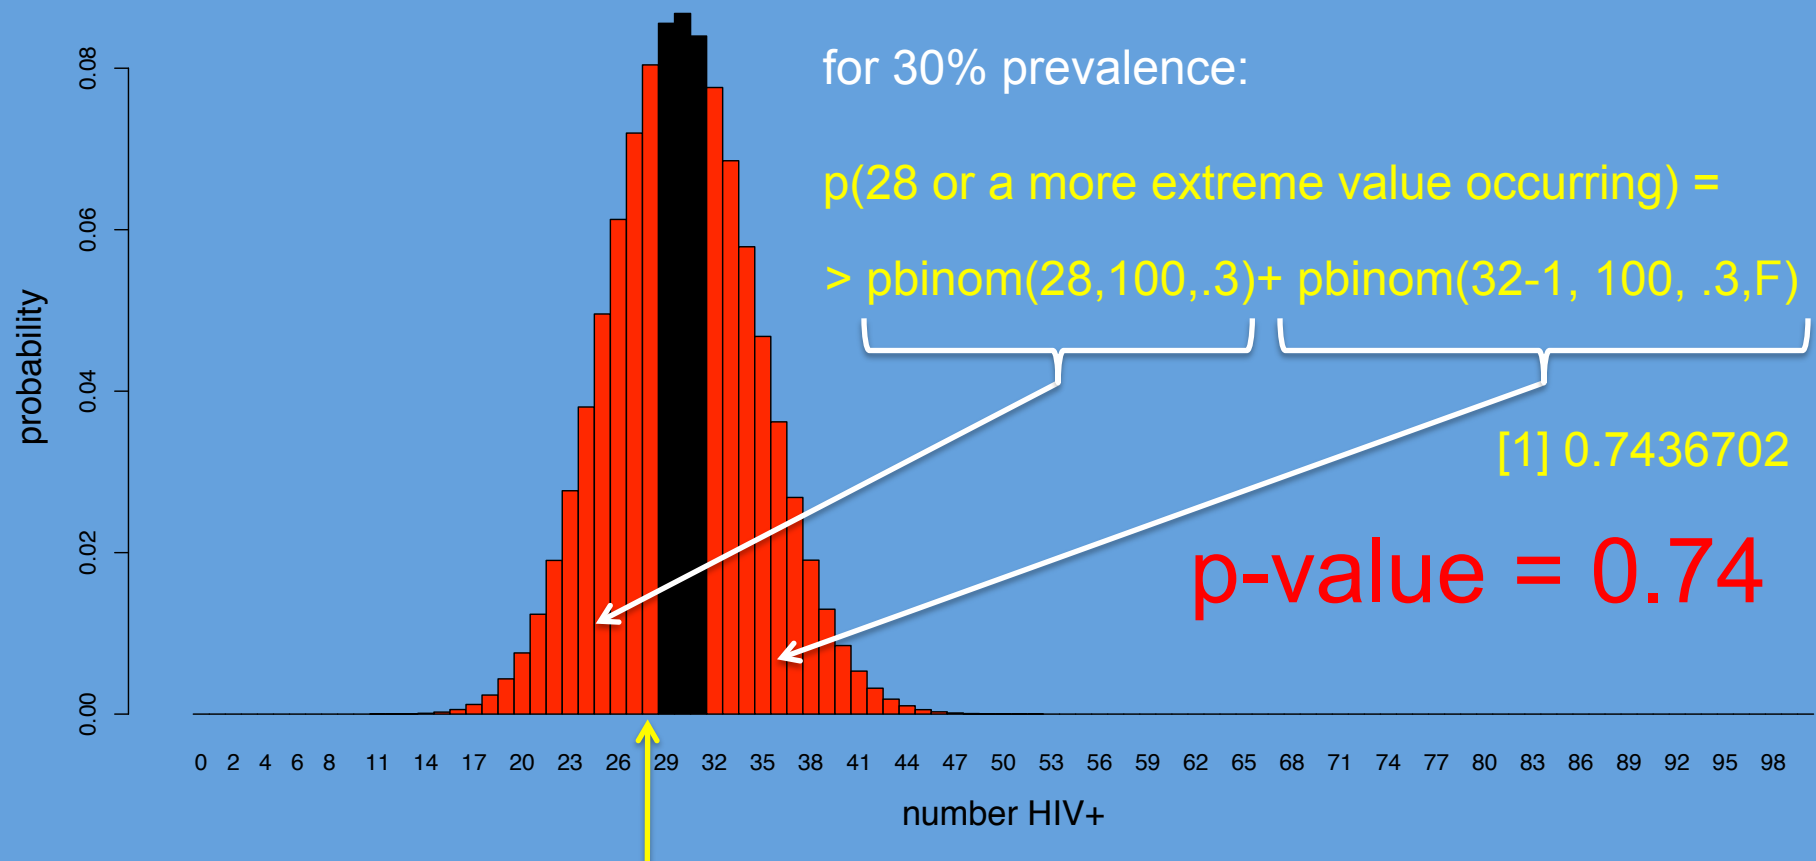

We sample 100 people once and 28 are positive.

If true prevalence were 15%, then p(28 or more extreme) is  
`pbinom(2, 100, 0.15, lower.tail = T) + pbinom(28-1, 100, 0.15, lower.tail = F)`

**p = 0.000628**

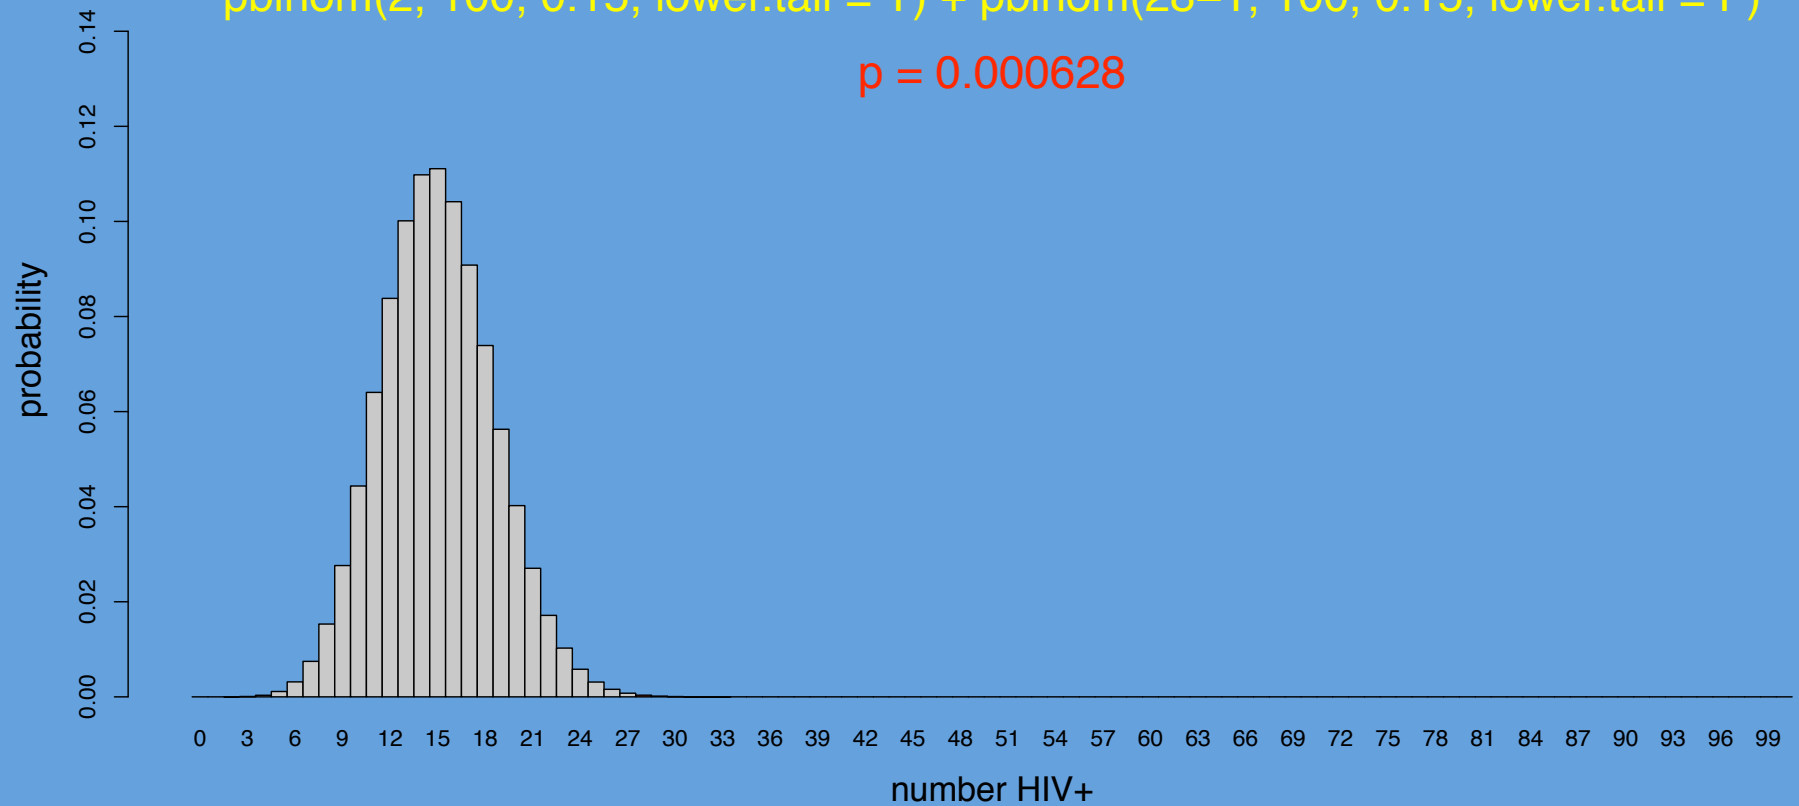

If true prevalence were 20%, then p(28 or more extreme) is  
`pbinom(12, 100, 0.2, lower.tail = T) + pbinom(28-1, 100, 0.2, lower.tail = F)`

$p = 0.0595$

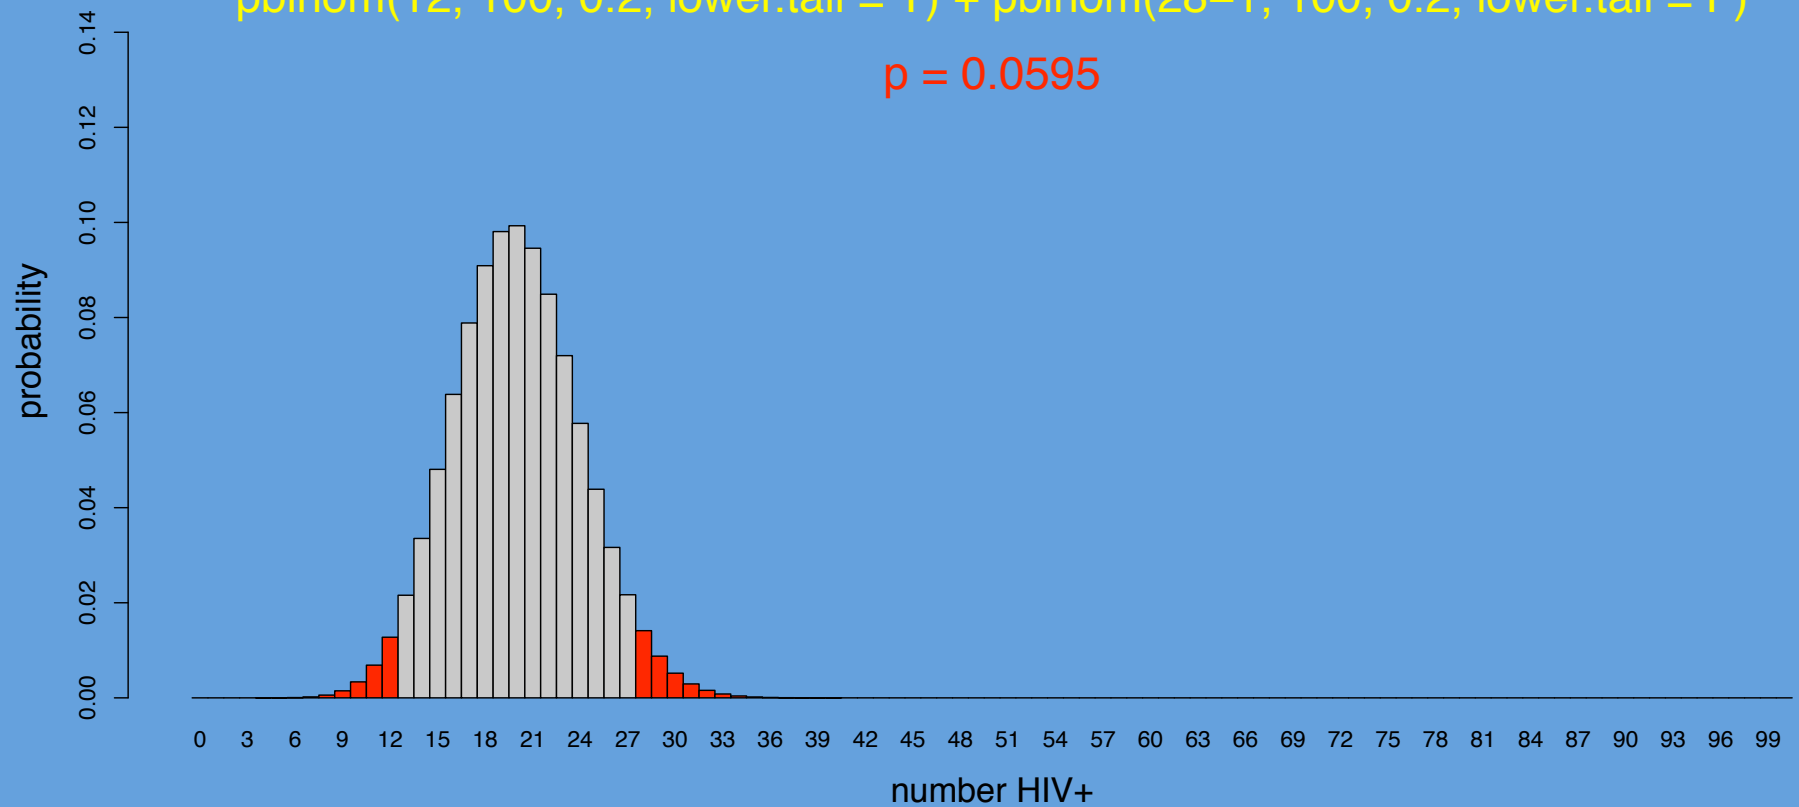

If true prevalence were 25%, then  $p(28 \text{ or more extreme})$  is  
 $\text{pbinom}(22, 100, 0.25, \text{lower.tail} = T) + \text{pbinom}(28-1, 100, 0.25, \text{lower.tail} = F)$

$p = 0.564$

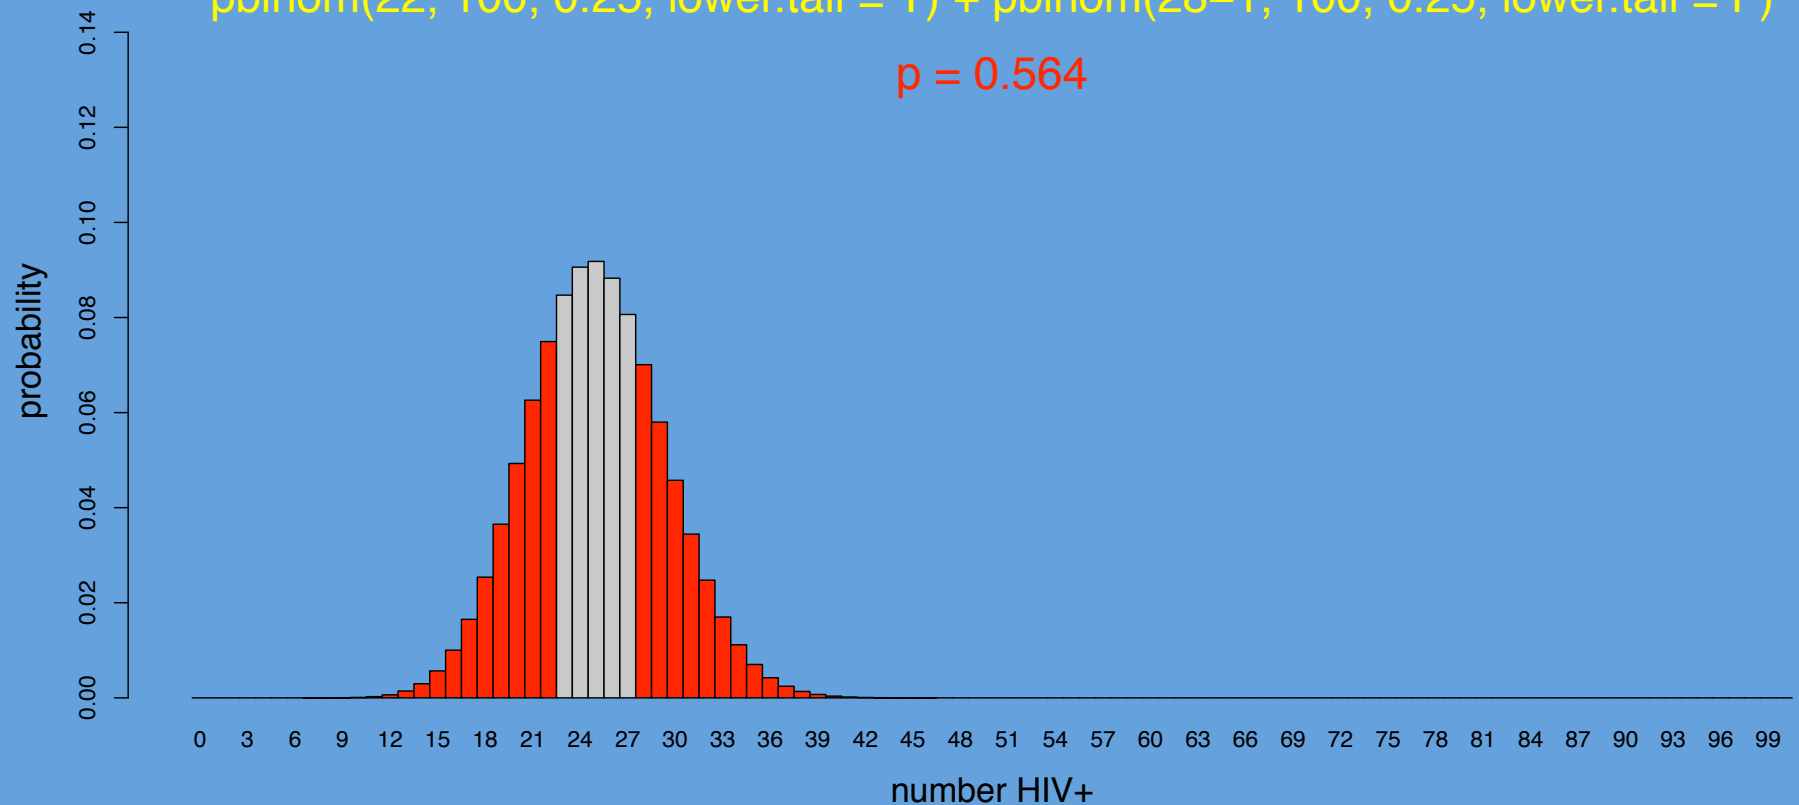



If true prevalence were 30%, then  $p(28 \text{ or more extreme})$  is  
 $\text{pbinom}(28, 100, 0.3, \text{lower.tail} = T) + \text{pbinom}(32-1, 100, 0.3, \text{lower.tail} = F)$

$p = 0.744$

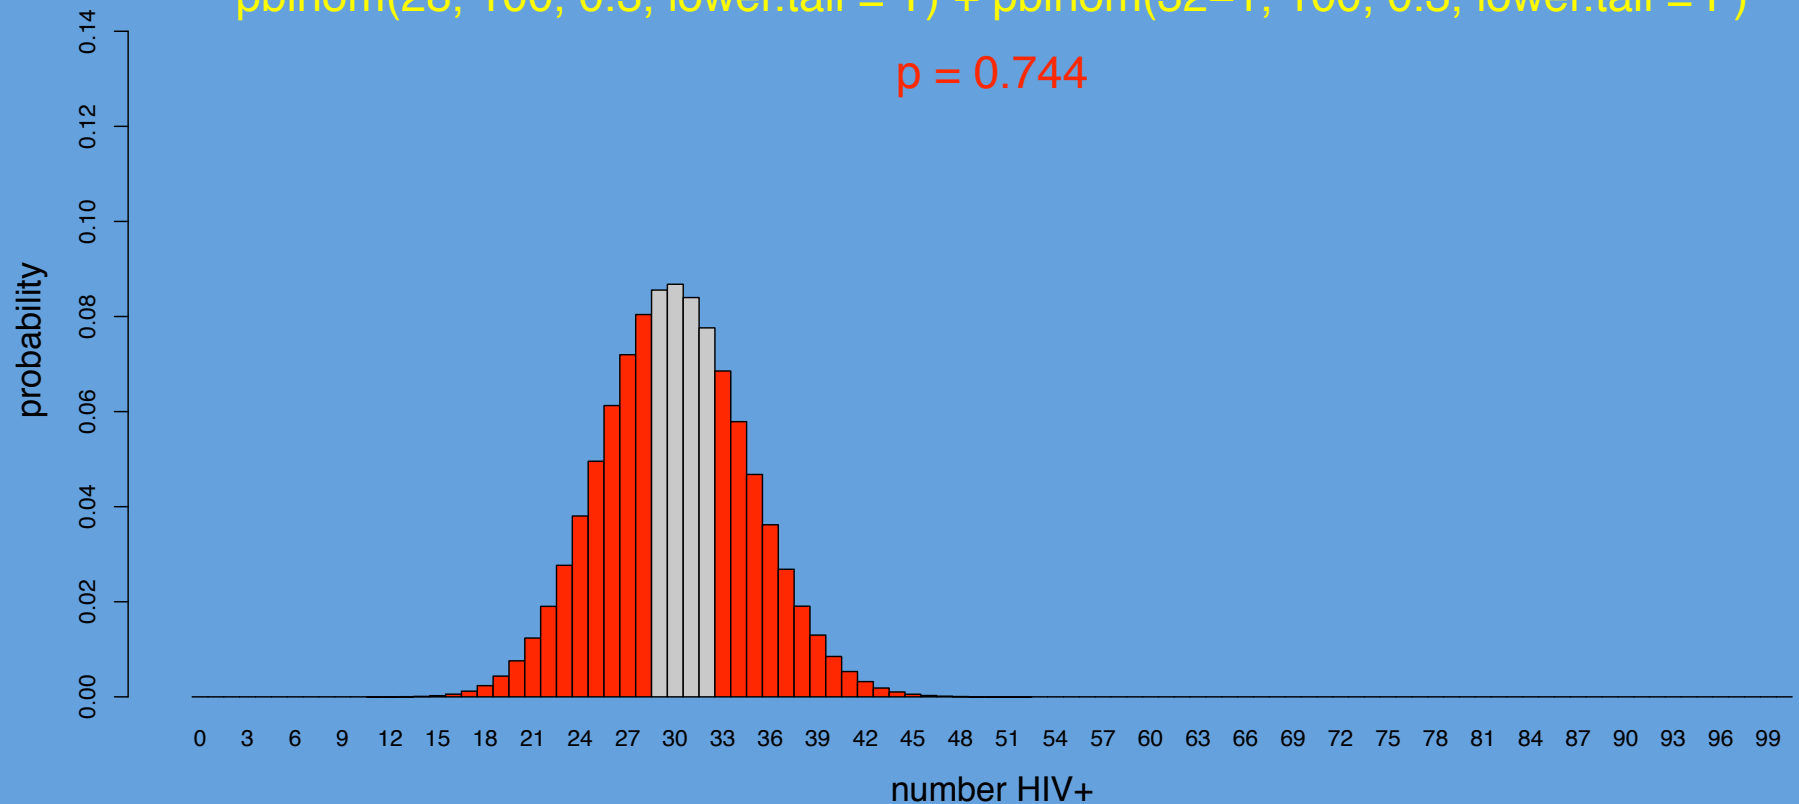

If true prevalence were 35%, then  $p(28 \text{ or more extreme})$  is  
 $\text{pbinom}(28, 100, 0.35, \text{lower.tail} = T) + \text{pbinom}(42-1, 100, 0.35, \text{lower.tail} = F)$

$p = 0.172$

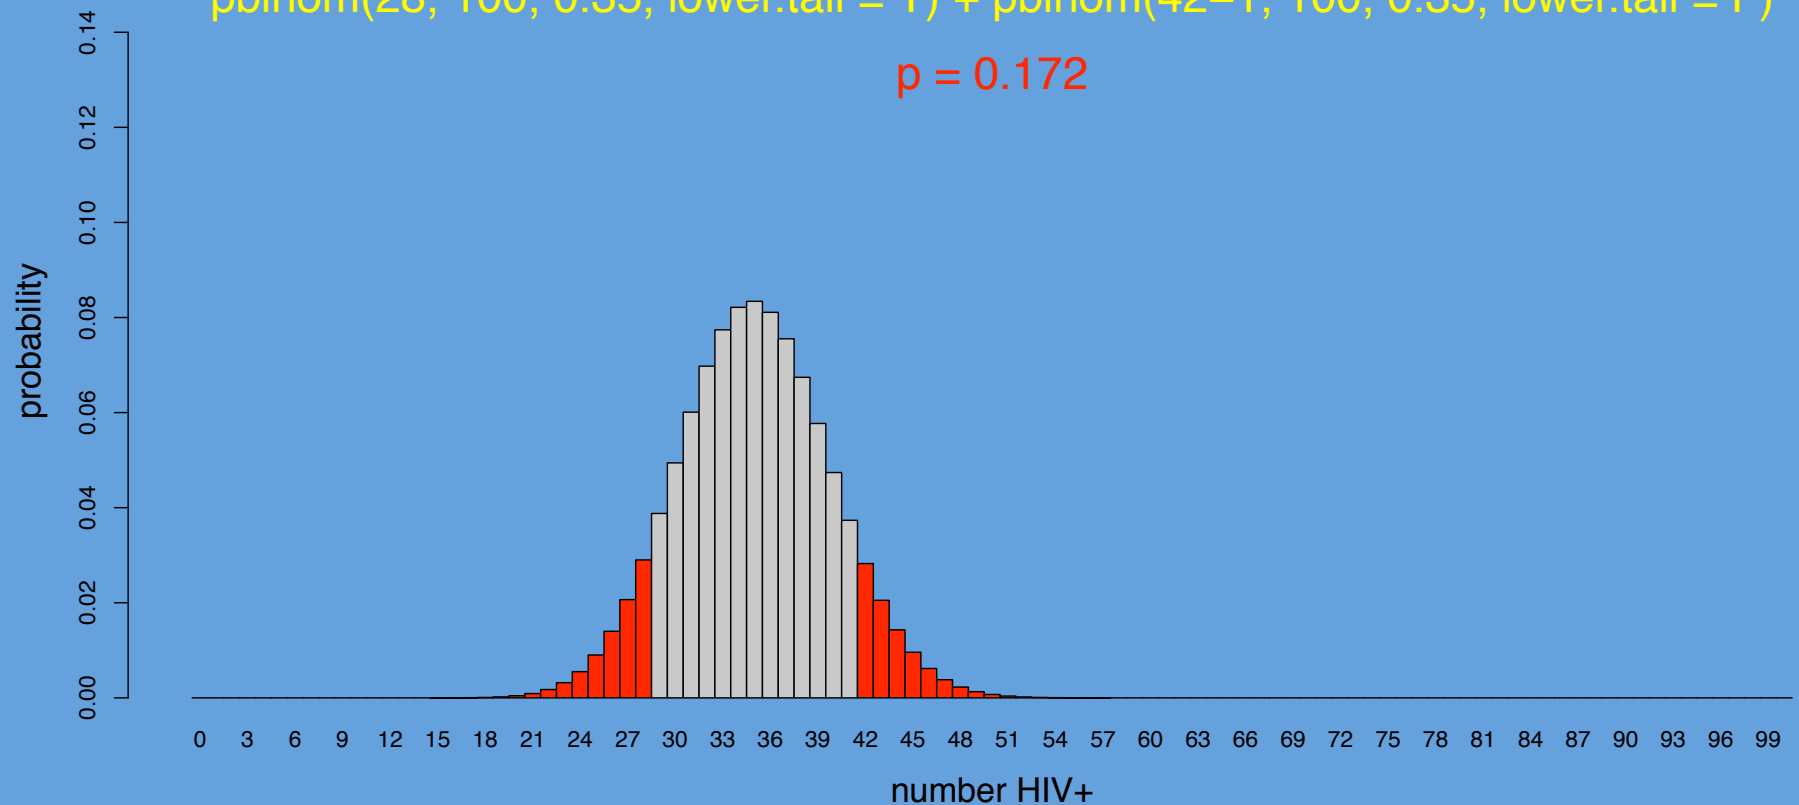

If true prevalence were 40%, then p(28 or more extreme) is  
`pbinom(28, 100, 0.4, lower.tail = T) + pbinom(52-1, 100, 0.4, lower.tail = F)`

$p = 0.0184$

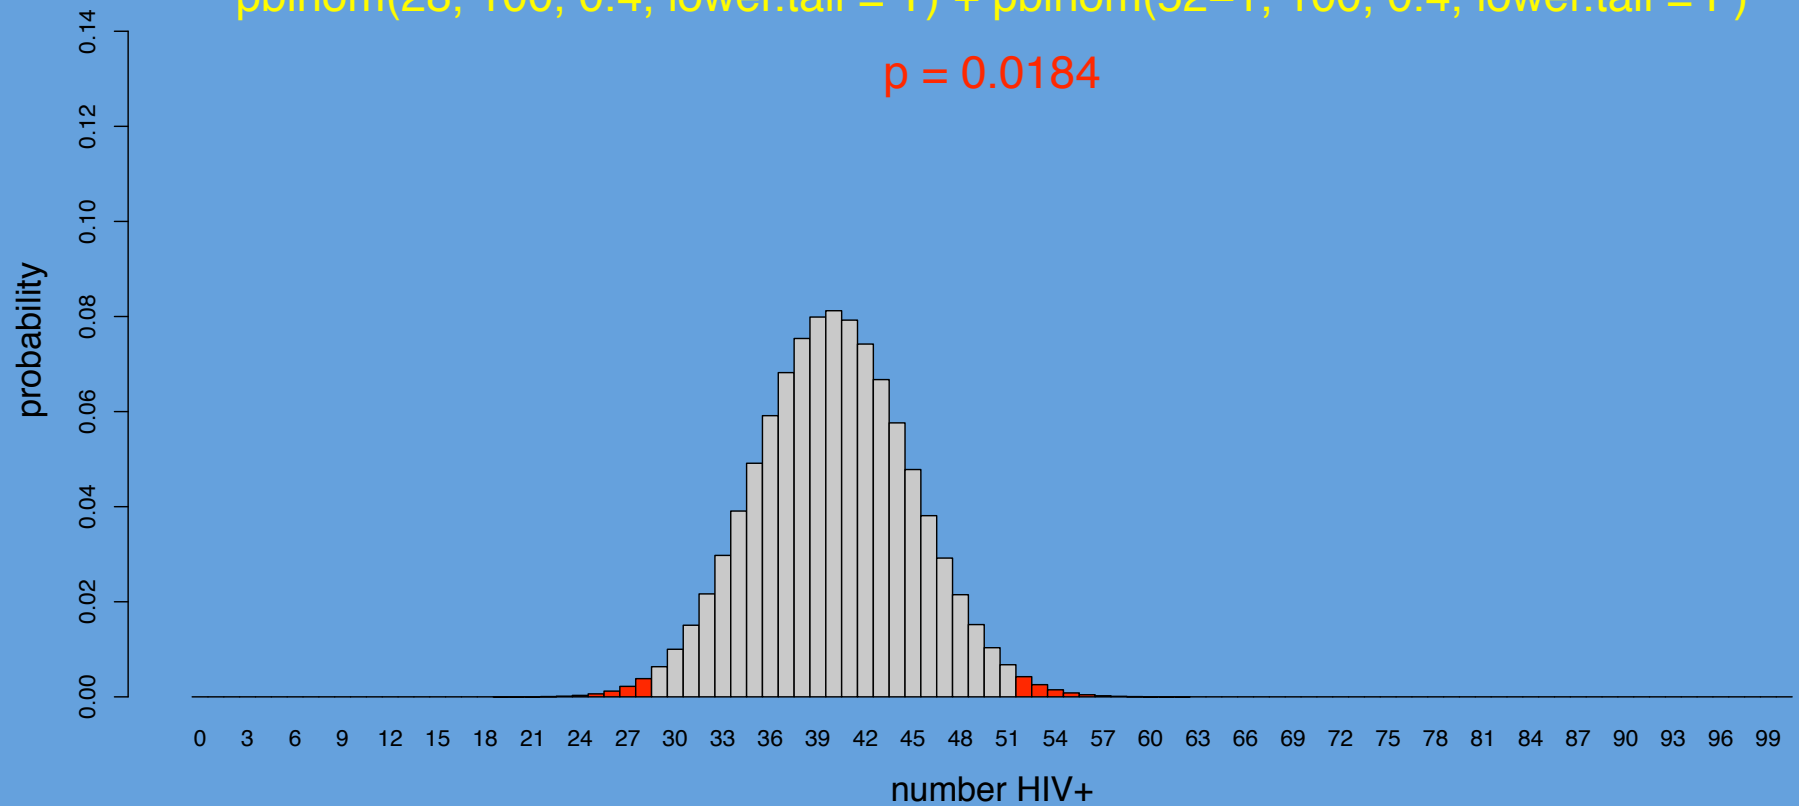

hypothetical prevalence: 15 %

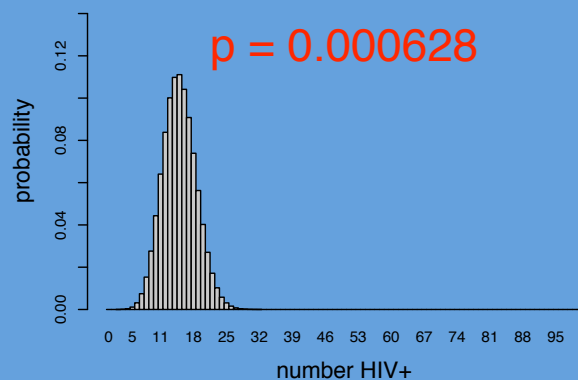

hypothetical prevalence: 20 %

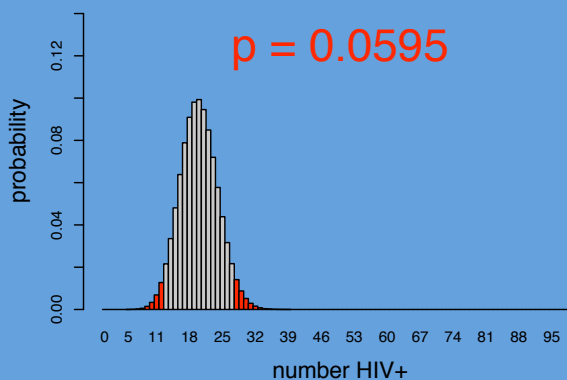

hypothetical prevalence: 25 %

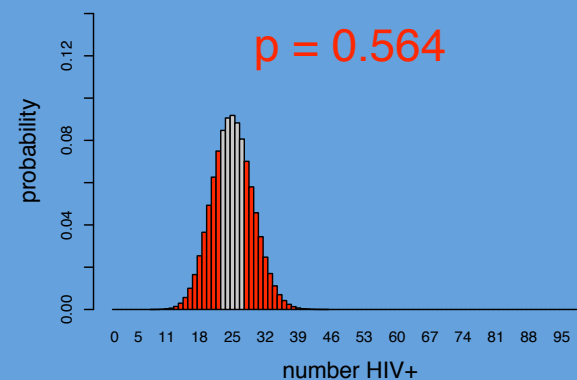

hypothetical prevalence: 30 %

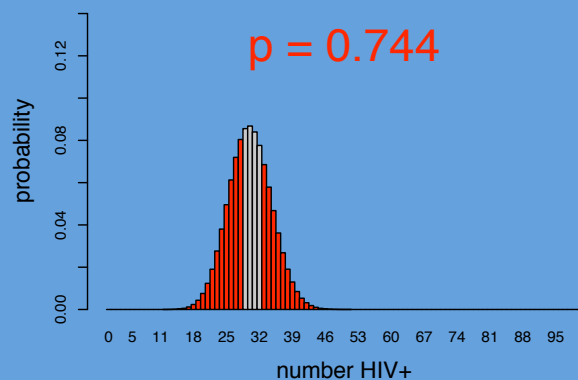

hypothetical prevalence: 35 %

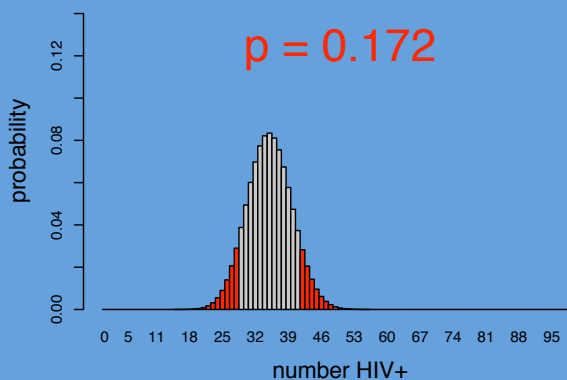

hypothetical prevalence: 40 %

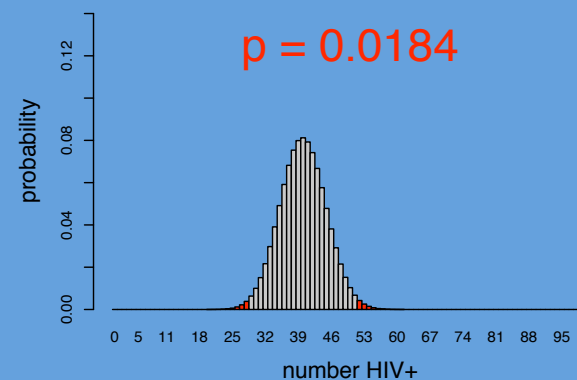

Which hypotheses do we reject?

IF GIVEN THE HYPOTHESIS

$p \text{ value} < \text{cutoff}$

THEN REJECT HYPOTHESIS

Cutoff usually chosen as  $\alpha = 0.05$

# Which hypotheses do we reject?

hypothetical prevalence: 15 %

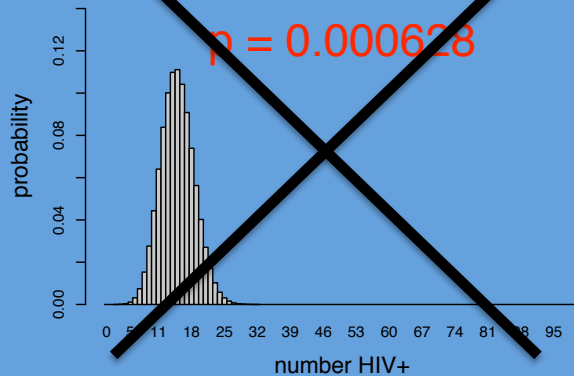

hypothetical prevalence: 20 %

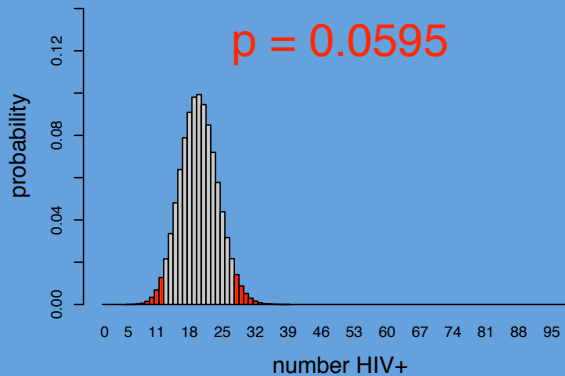

hypothetical prevalence: 25 %

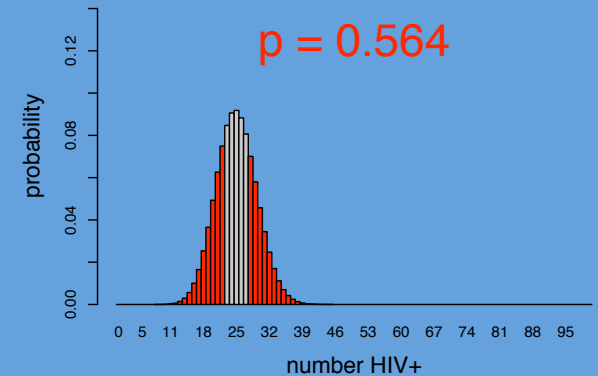

hypothetical prevalence: 30 %

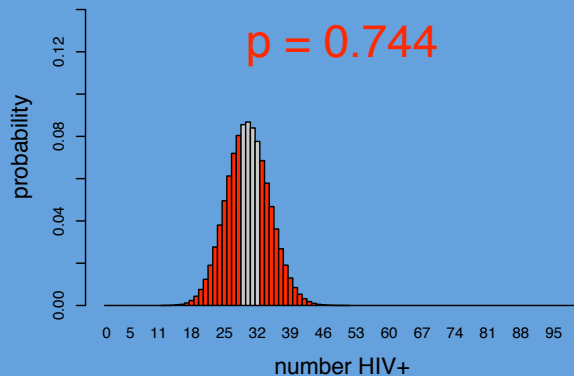

hypothetical prevalence: 35 %

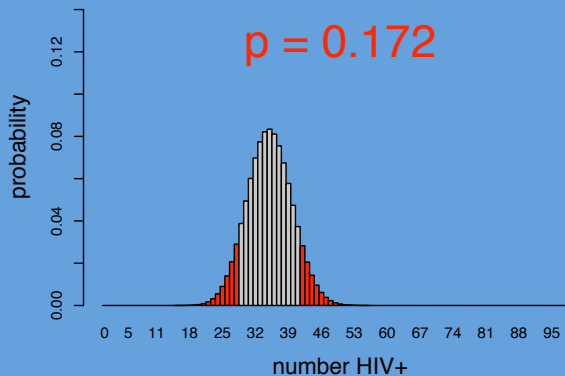

hypothetical prevalence: 40 %

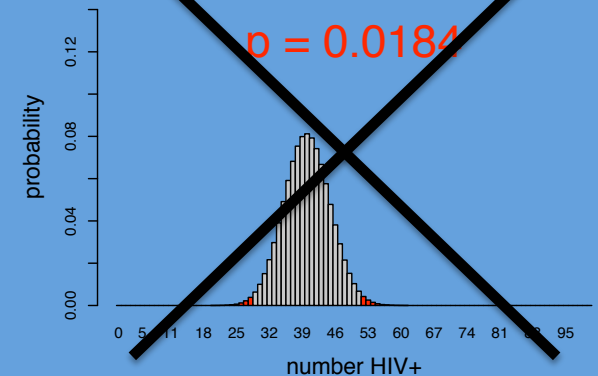

# Which hypotheses do we NOT reject: CONFIDENCE INTERVAL

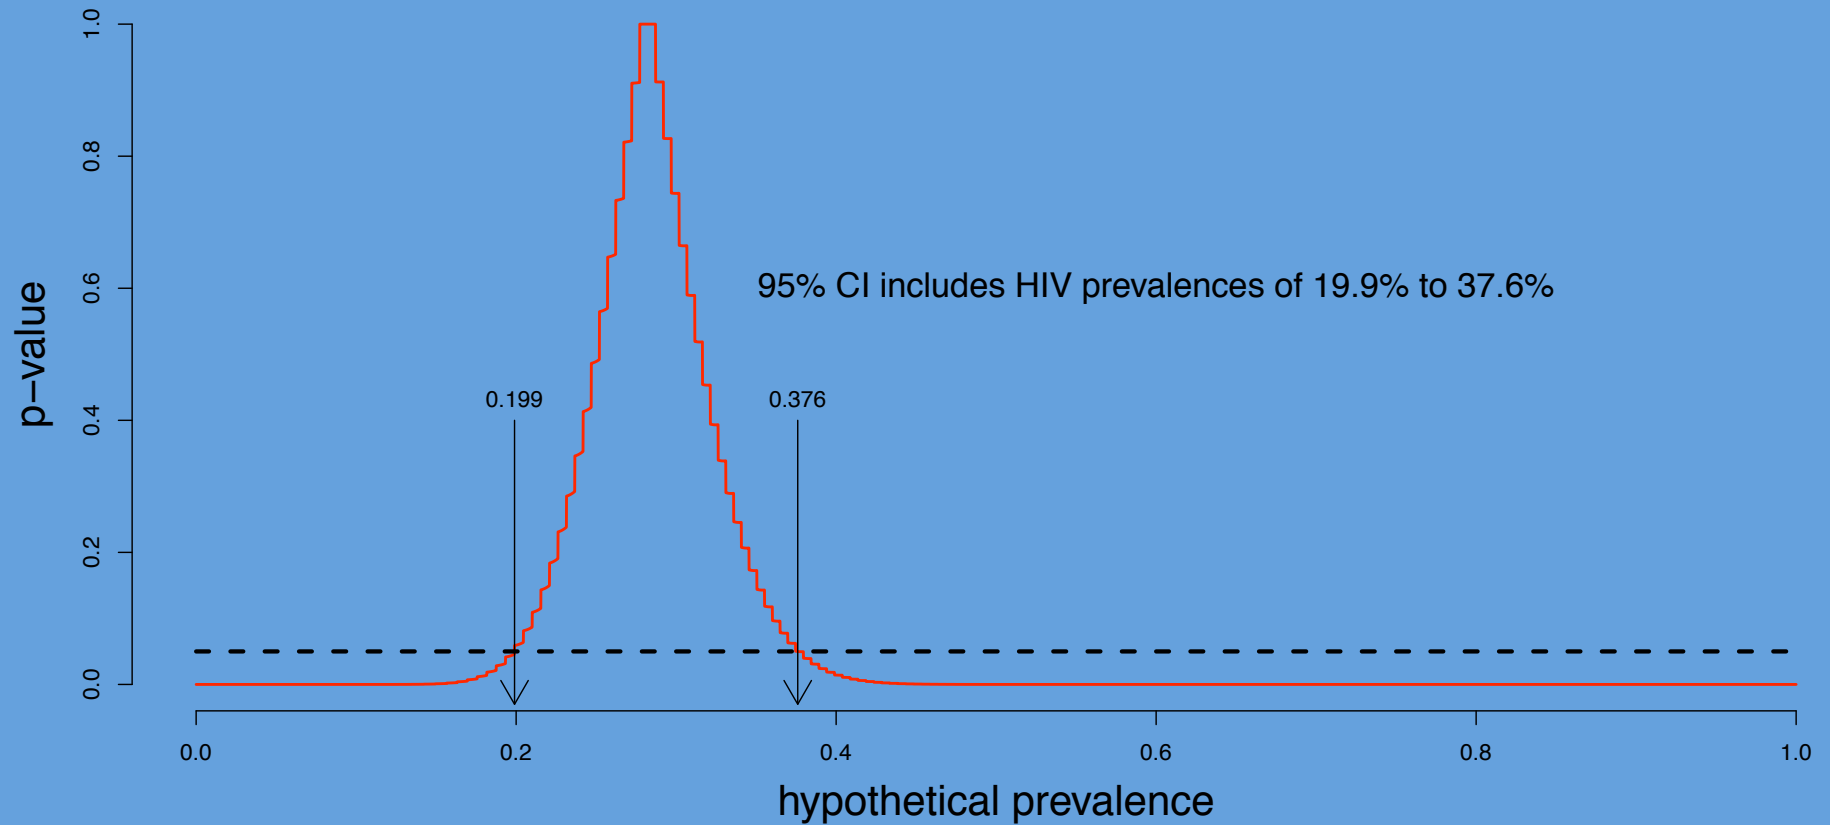

# Let's take another approach

We don't know the true prevalence, but the probability that we had **exactly** 28/100 with 30% prevalence is:

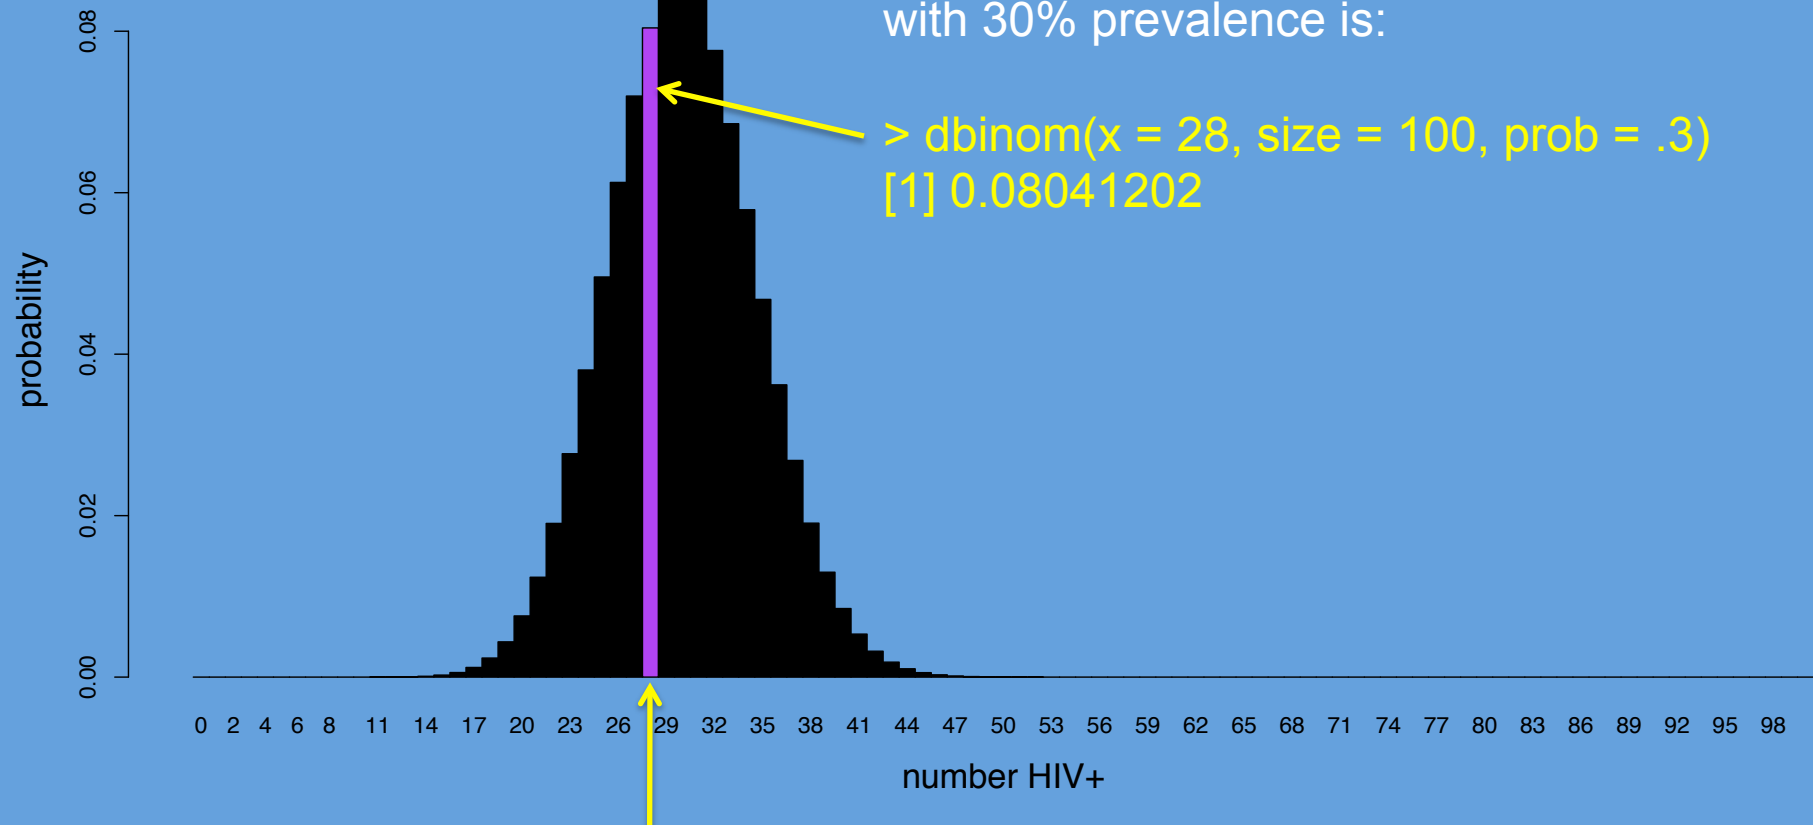

```
> dbinom(x = 28, size = 100, prob = .3)
[1] 0.08041202
```

We sample 100 people once and 28 are positive:

```
> rbinom(n = 1, size = 100, prob = .3)
[1] 28
```



hypothetical prevalence: 15 %

$\text{dbinom}(28, 100, 0.15) = 0.00035$

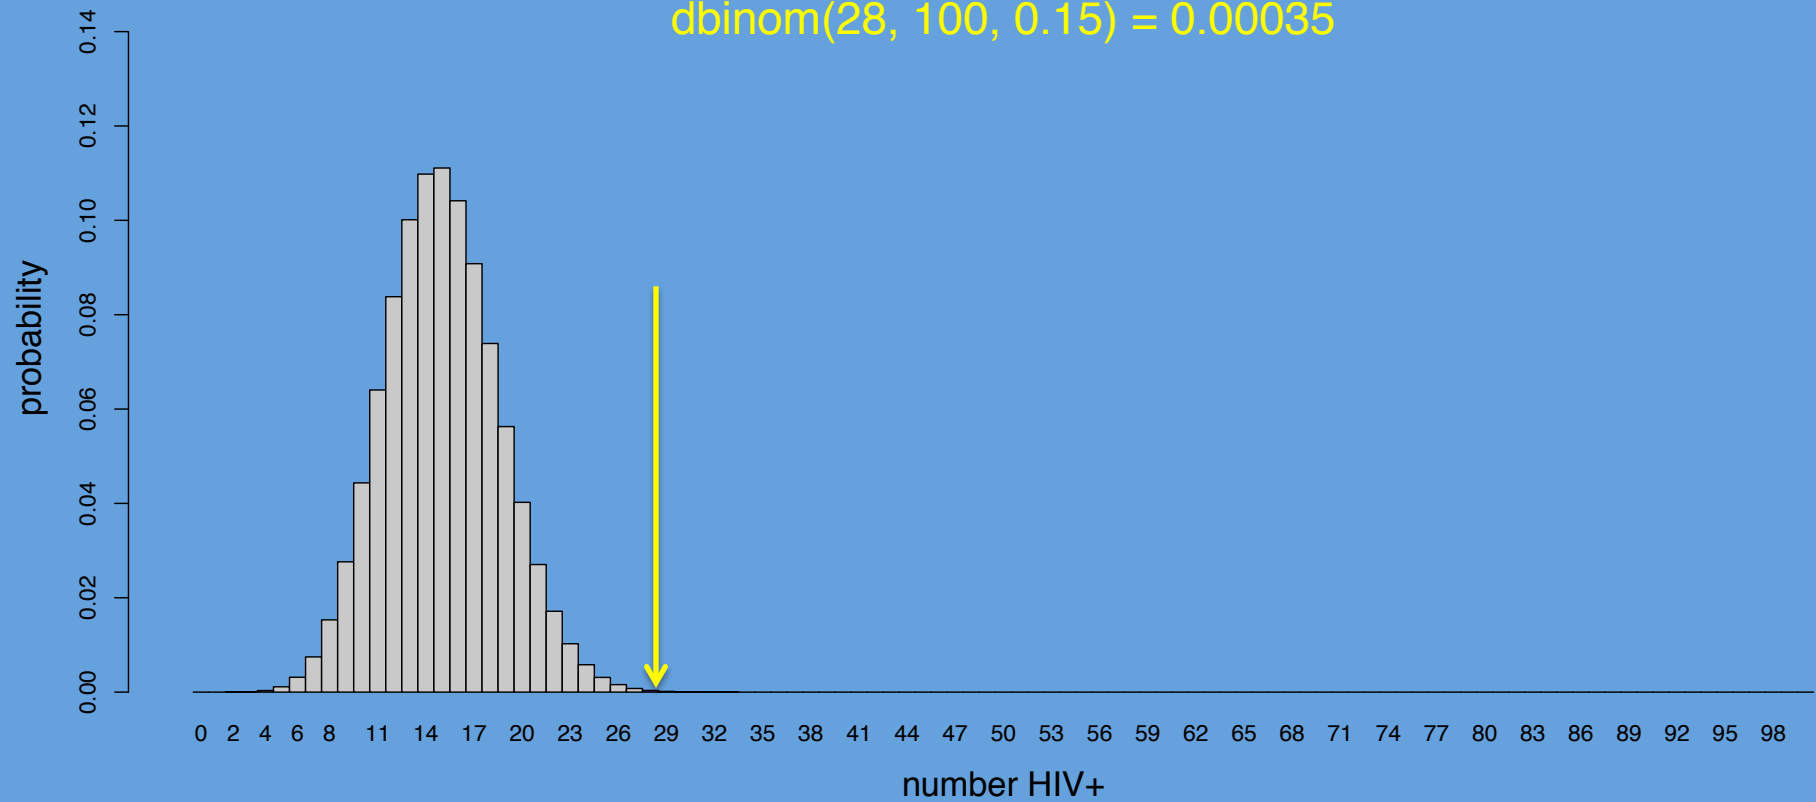

hypothetical prevalence: 20 %

$\text{dbinom}(28, 100, 0.2) = 0.014$

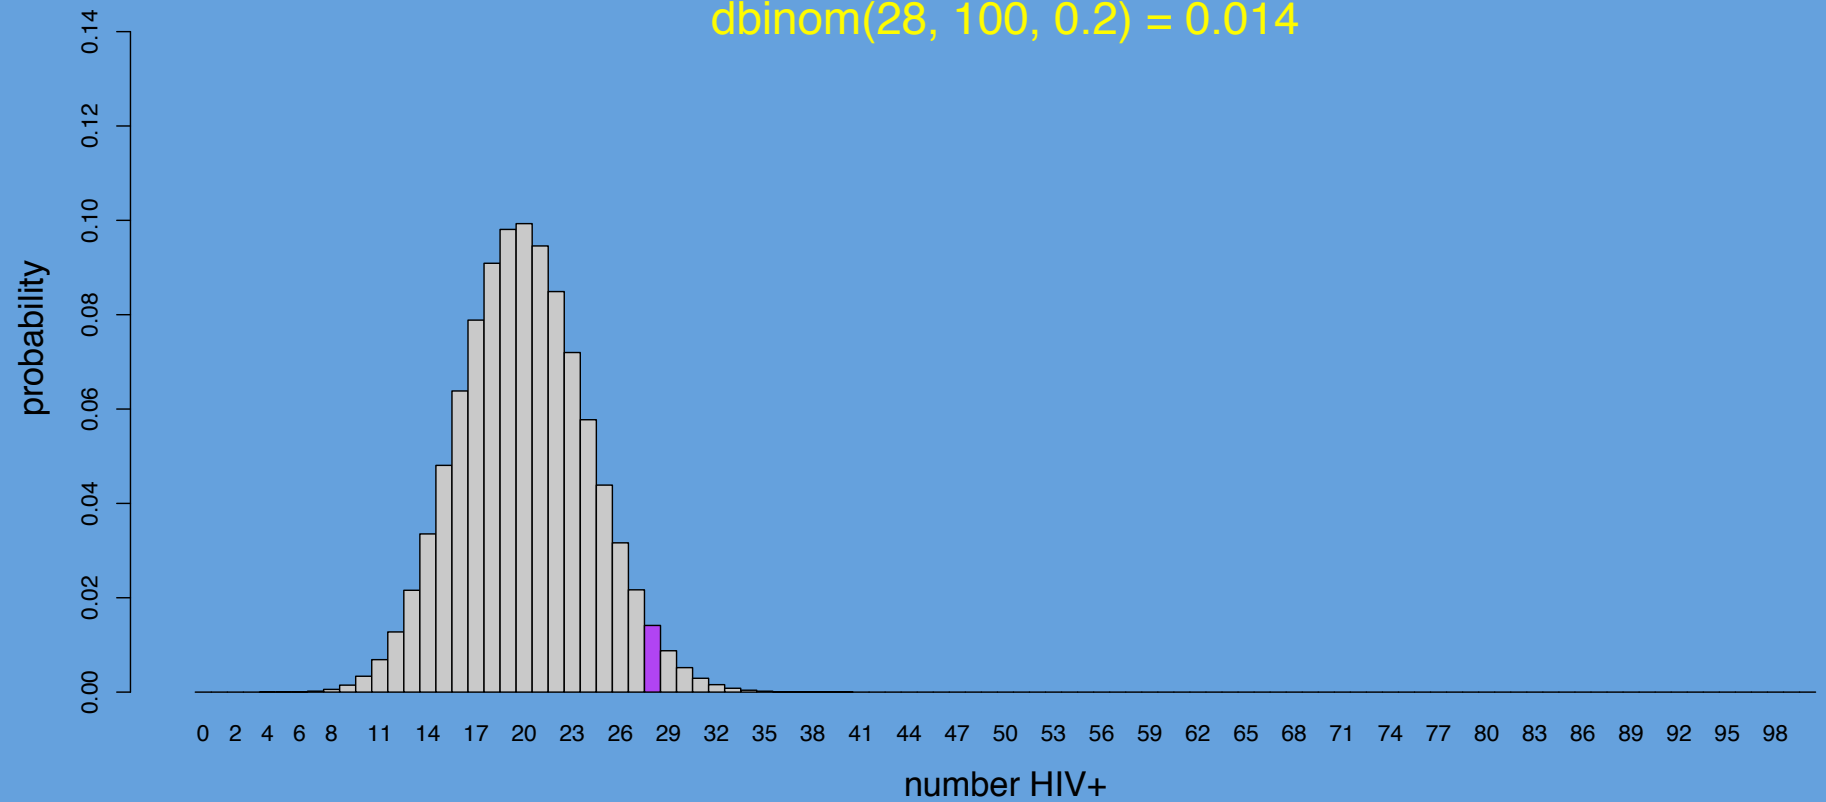

hypothetical prevalence: 25 %

$\text{dbinom}(28, 100, 0.25) = 0.07$

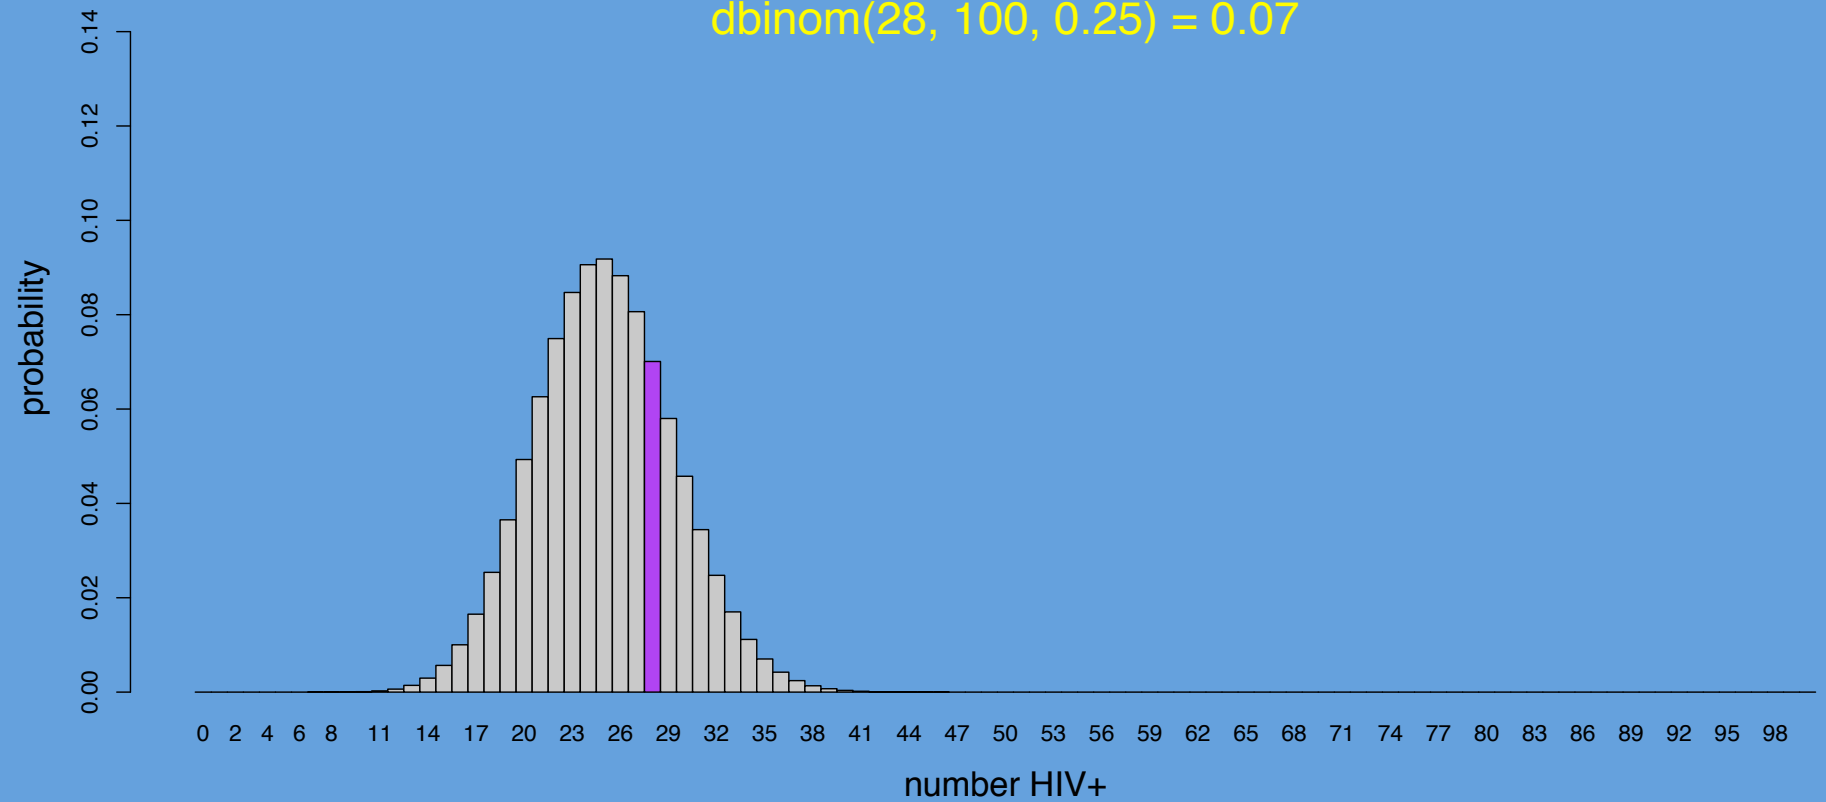

hypothetical prevalence: 30 %

$\text{dbinom}(28, 100, 0.3) = 0.08$

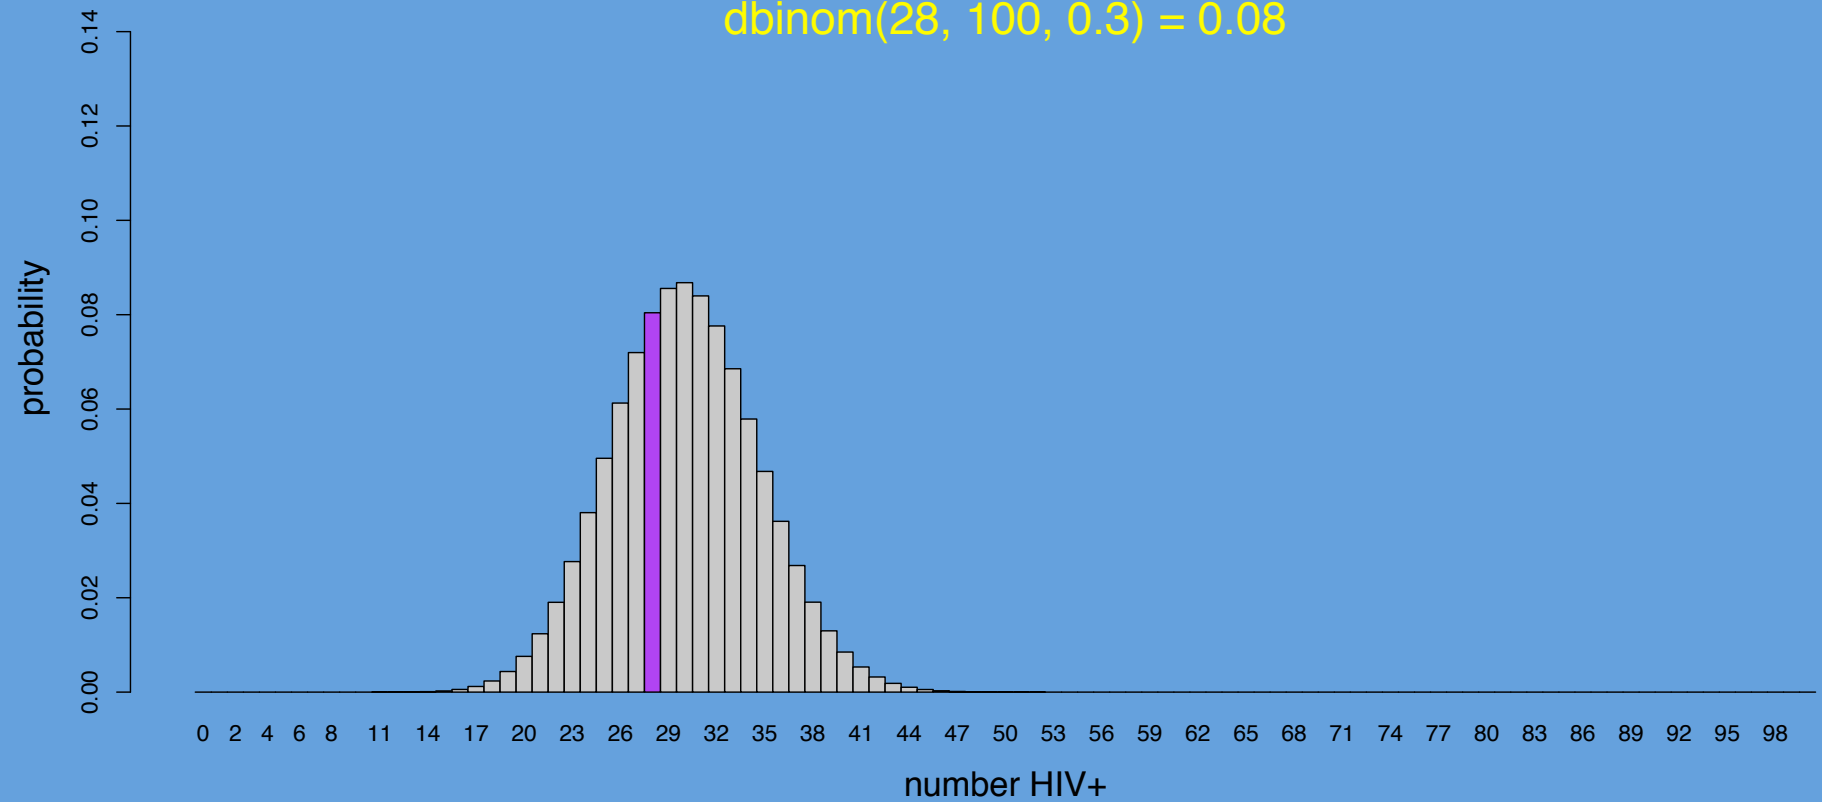

hypothetical prevalence: 35 %

$\text{dbinom}(28, 100, 0.35) = 0.029$

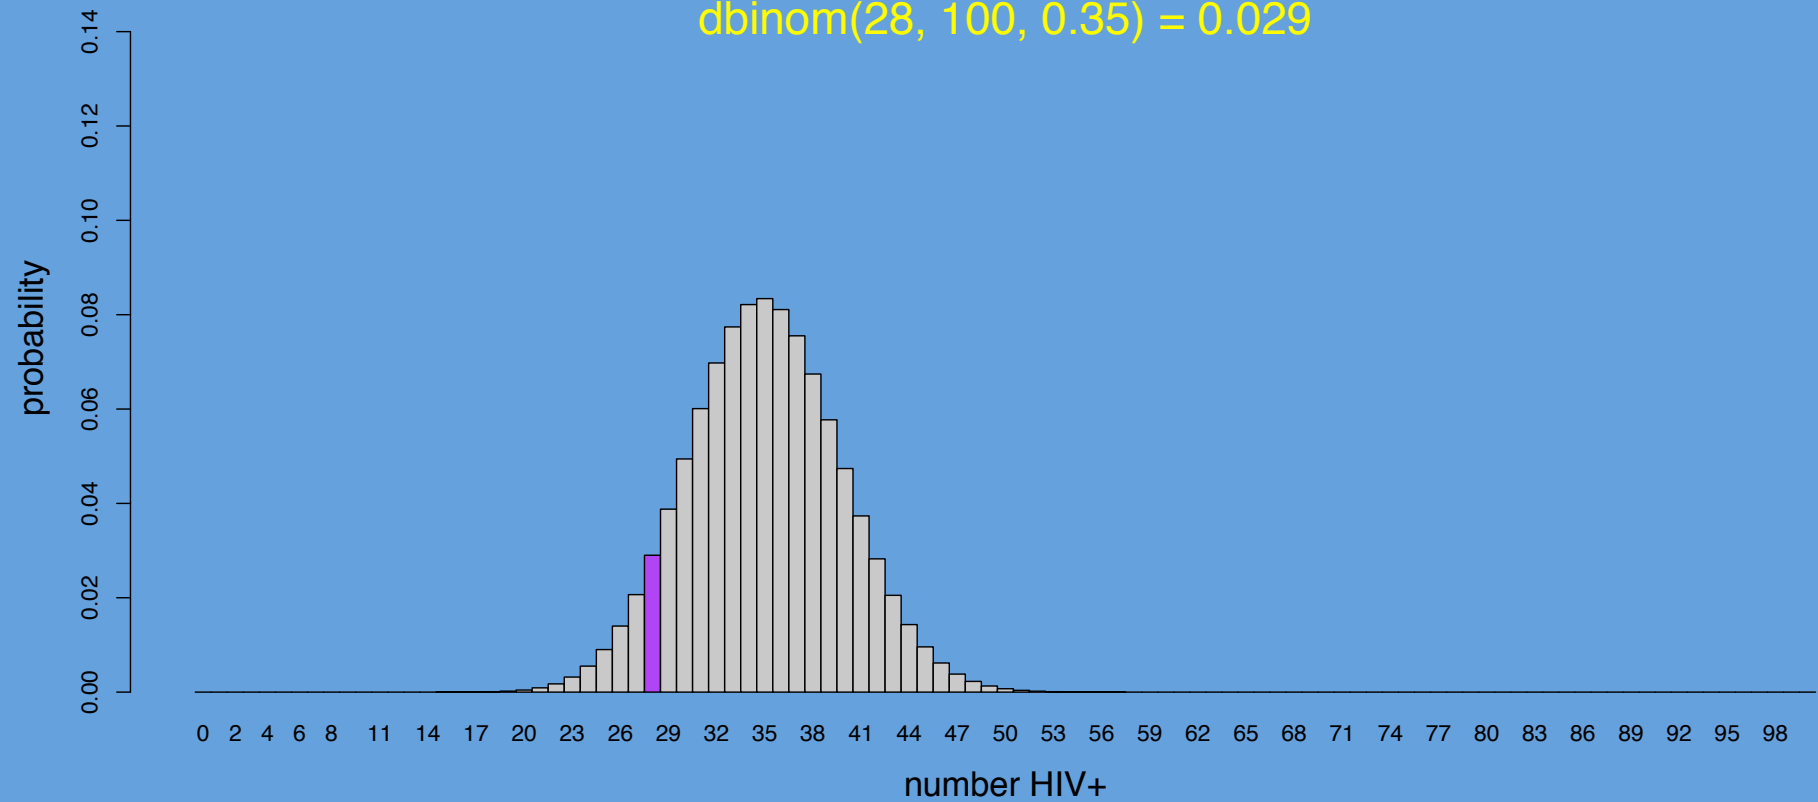

hypothetical prevalence: 40 %

$\text{dbinom}(28, 100, 0.4) = 0.0038$

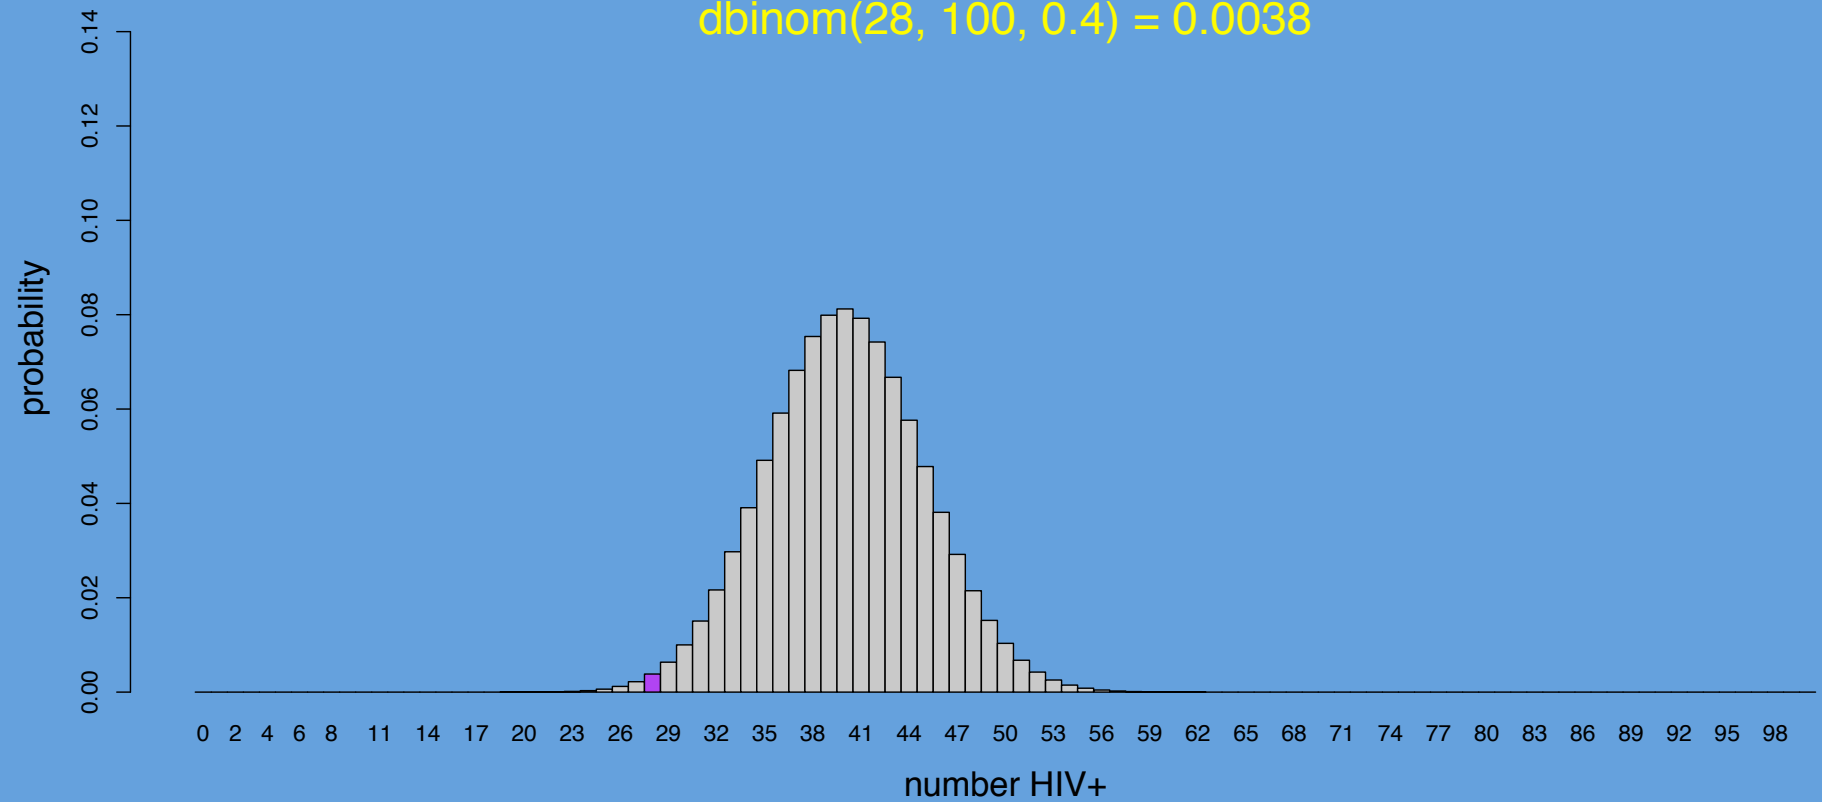

# Which prevalence gives the greatest probability of observing **exactly** 28/100?

hypothetical prevalence: 15 %

$\text{dbinom}(28, 100, 0.15) = 0.00035$

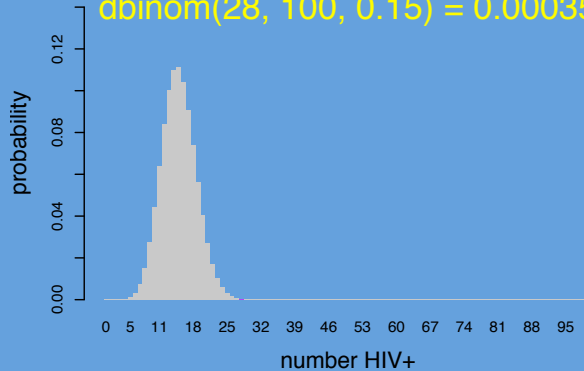

hypothetical prevalence: 20 %

$\text{dbinom}(28, 100, 0.2) = 0.014$

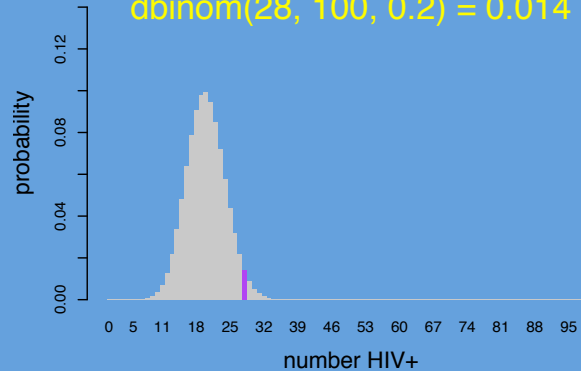

hypothetical prevalence: 25 %

$\text{dbinom}(28, 100, 0.25) = 0.07$

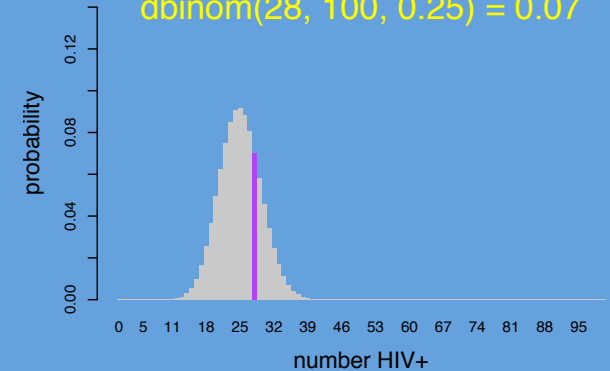

hypothetical prevalence: 30 %

$\text{dbinom}(28, 100, 0.3) = 0.08$

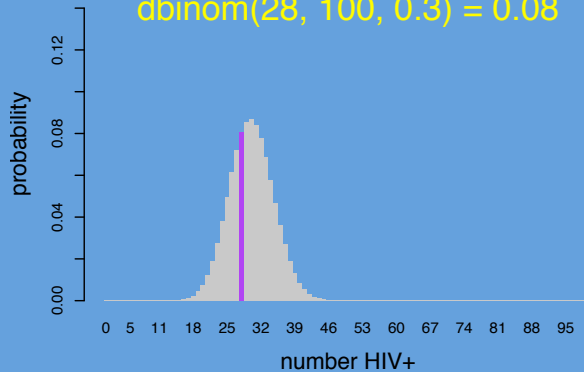

hypothetical prevalence: 35 %

$\text{dbinom}(28, 100, 0.35) = 0.029$

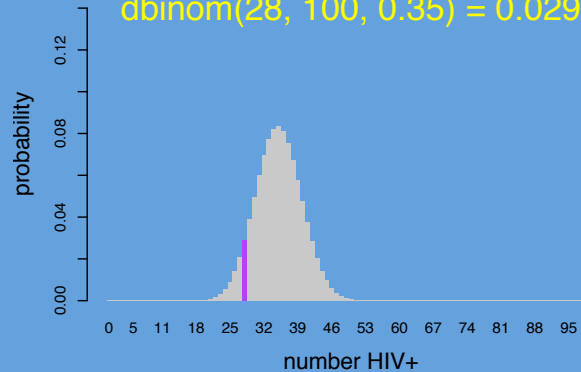

hypothetical prevalence: 40 %

$\text{dbinom}(28, 100, 0.4) = 0.0038$

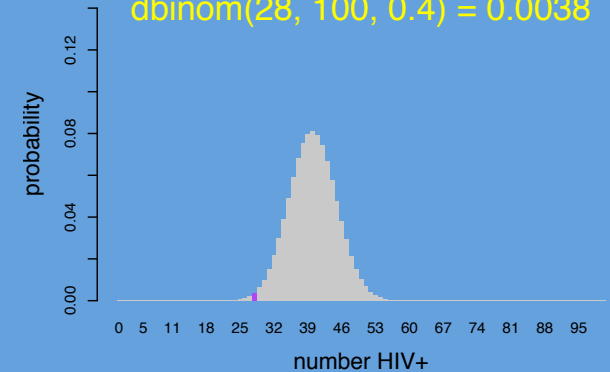

# Which of these prevalence values is most likely given our data?

hypothetical prevalence: 15 %

$$\text{dbinom}(28, 100, 0.15) = 0.00035$$

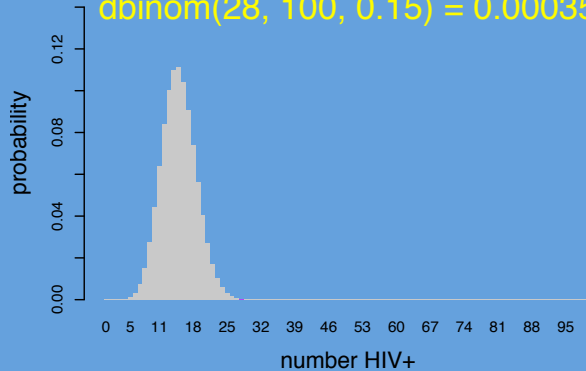

hypothetical prevalence: 20 %

$$\text{dbinom}(28, 100, 0.2) = 0.014$$

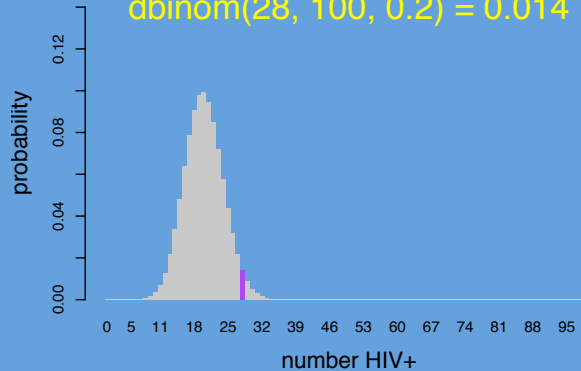

hypothetical prevalence: 25 %

$$\text{dbinom}(28, 100, 0.25) = 0.07$$

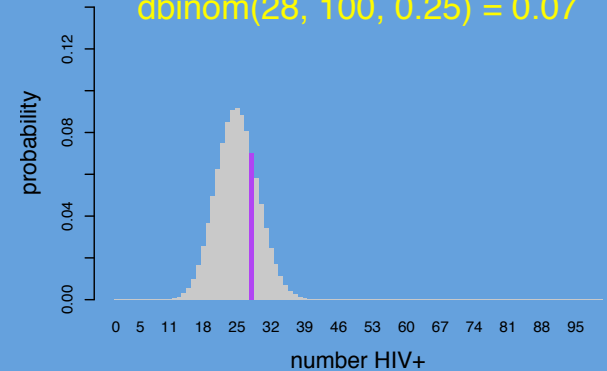

hypothetical prevalence: 30 %

$$\text{dbinom}(28, 100, 0.3) = 0.08$$

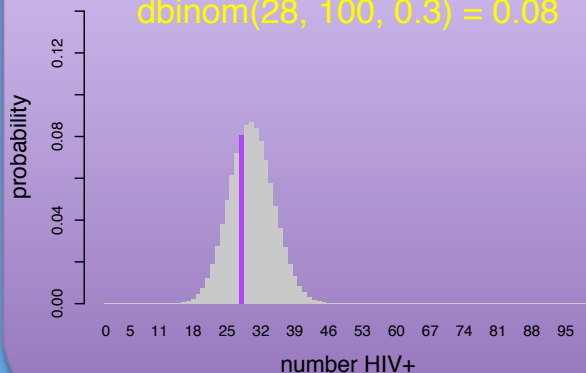

hypothetical prevalence: 35 %

$$\text{dbinom}(28, 100, 0.35) = 0.029$$

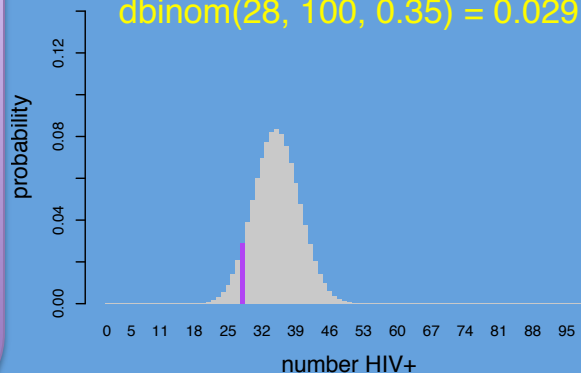

hypothetical prevalence: 40 %

$$\text{dbinom}(28, 100, 0.4) = 0.0038$$

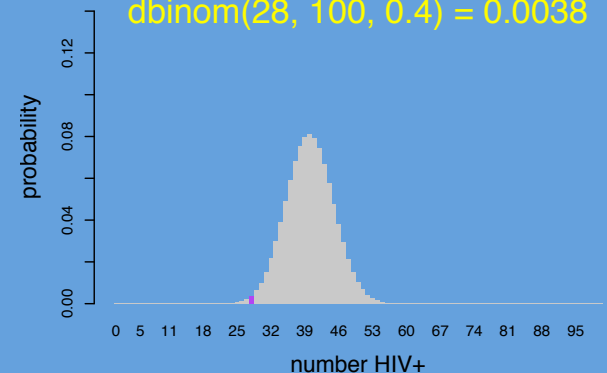



$p(\text{our data given prevalence}) = \text{LIKELIHOOD}$

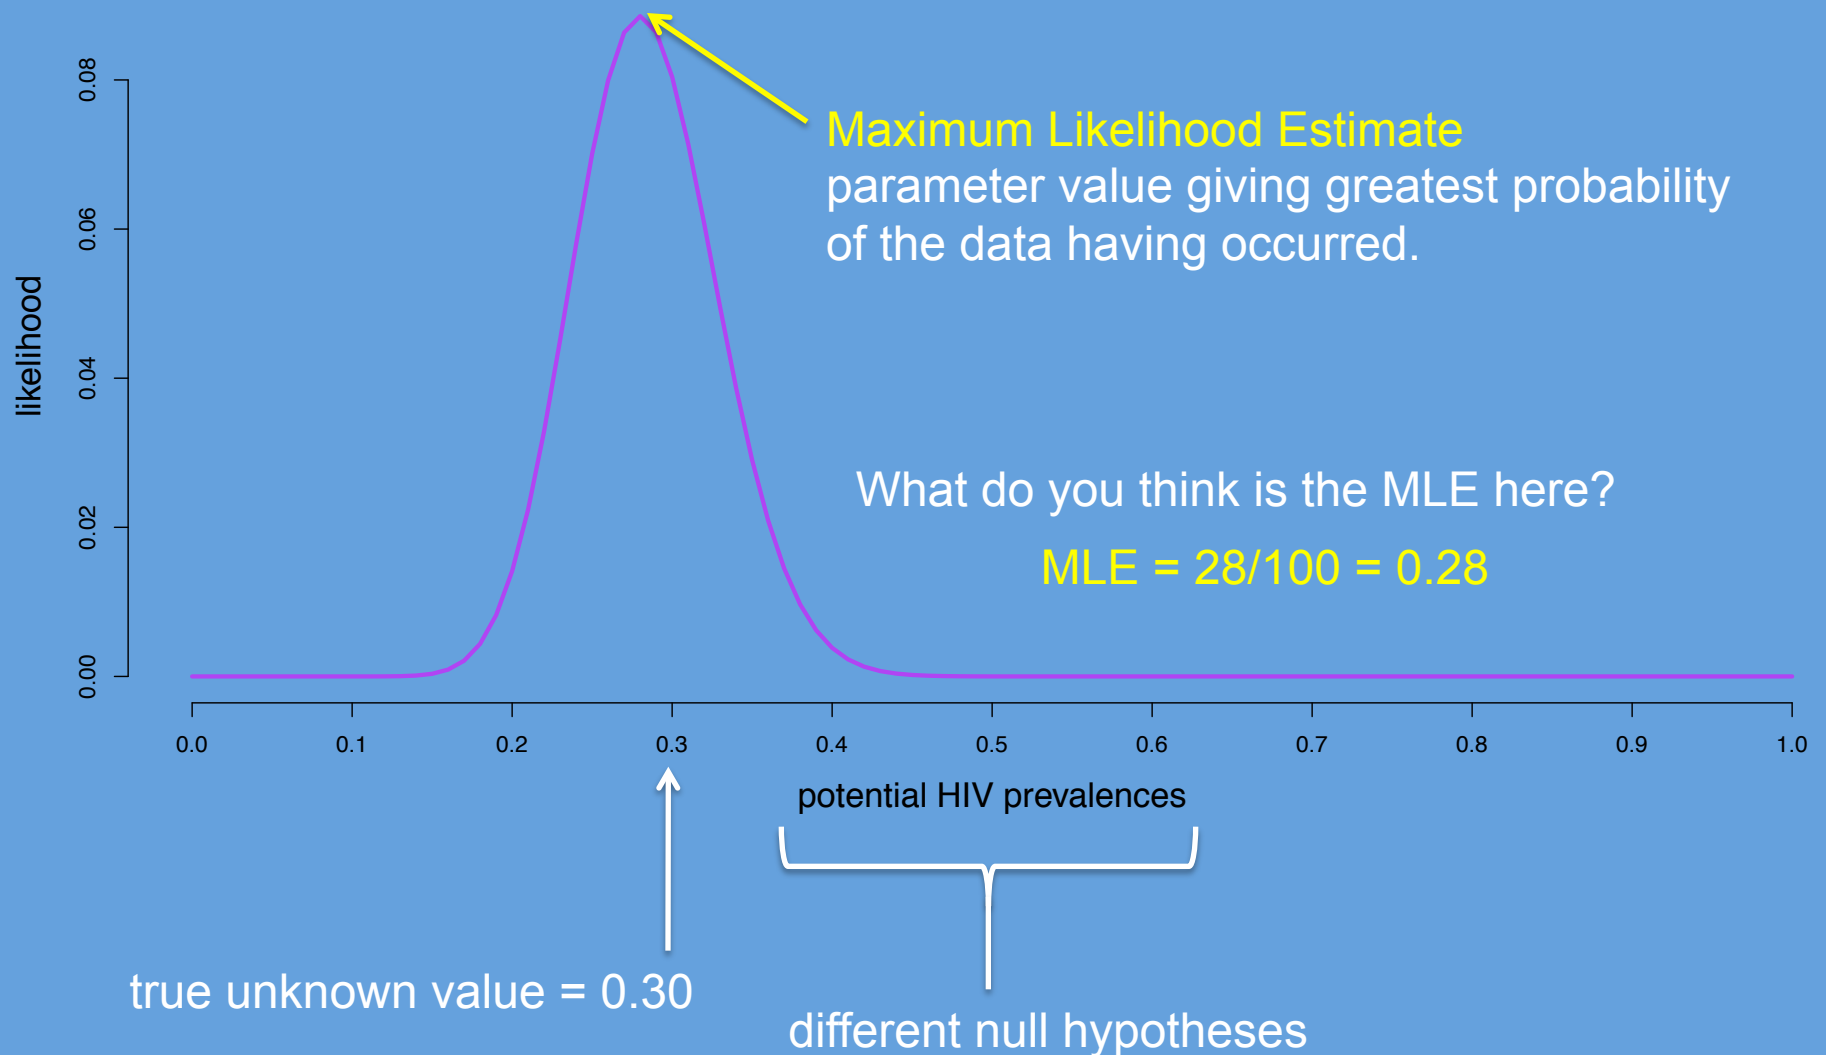

# Defining Likelihood

- $L(\text{parameter} \mid \text{data}) = p(\text{data} \mid \text{parameter})$

- Not a probability distribution.

function of  $x$

PDF:  $f(x \mid p) = \binom{n}{x} p^x (1-p)^{n-x}$

- Probabilities taken from many different distributions.

LIKELIHOOD:  $L(p \mid x) = \binom{n}{x} p^x (1-p)^{n-x}$

function of  $p$

# Deriving the Maximum Likelihood Estimate

maximize

$$L(p) = \binom{n}{x} p^x (1-p)^{n-x}$$

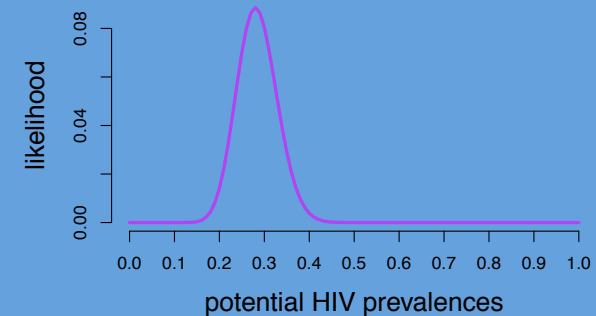

maximize

$$\log(L(p)) = \log \left[ \binom{n}{x} p^x (1-p)^{n-x} \right]$$

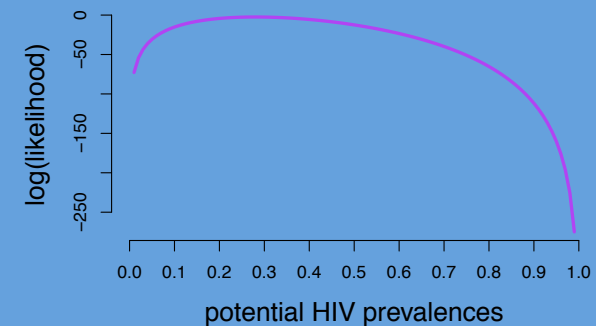

minimize

$$l(p) = -\log \left[ \binom{n}{x} p^x (1-p)^{n-x} \right]$$

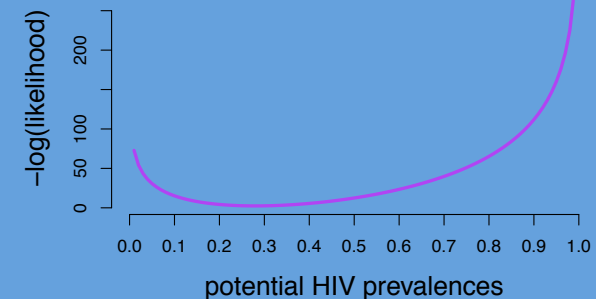

# Deriving the Maximum Likelihood Estimate

$$l(p) = -\log(L(p)) = -\log\left[\binom{n}{x} p^x (1-p)^{n-x}\right]$$

$$l(p) = -\log\binom{n}{x} - \log(p^x) - \log((1-p)^{n-x})$$

$$l(p) = -\log\binom{n}{x} - x \log(p) - (n-x) \log(1-p)$$

# Deriving the Maximum Likelihood Estimate

$$l(p) = -\log \binom{n}{x} - x \log(p) - (n - x) \log(1 - p)$$

$$\frac{dl(p)}{dp} = -\frac{x}{p} - \frac{-(n - x)}{1 - p}$$

$$0 = -x + \hat{p}n$$

$$0 = -\frac{x}{\hat{p}} + \frac{n - x}{1 - \hat{p}}$$

$$0 = \frac{-x(1 - \hat{p}) + \hat{p}(n - x)}{\hat{p}(1 - \hat{p})}$$

$$\hat{p} = \frac{x}{n}$$

$$0 = -x + \cancel{\hat{p}x} + \hat{p}n - \cancel{\hat{p}x}$$

The proportion of positives!

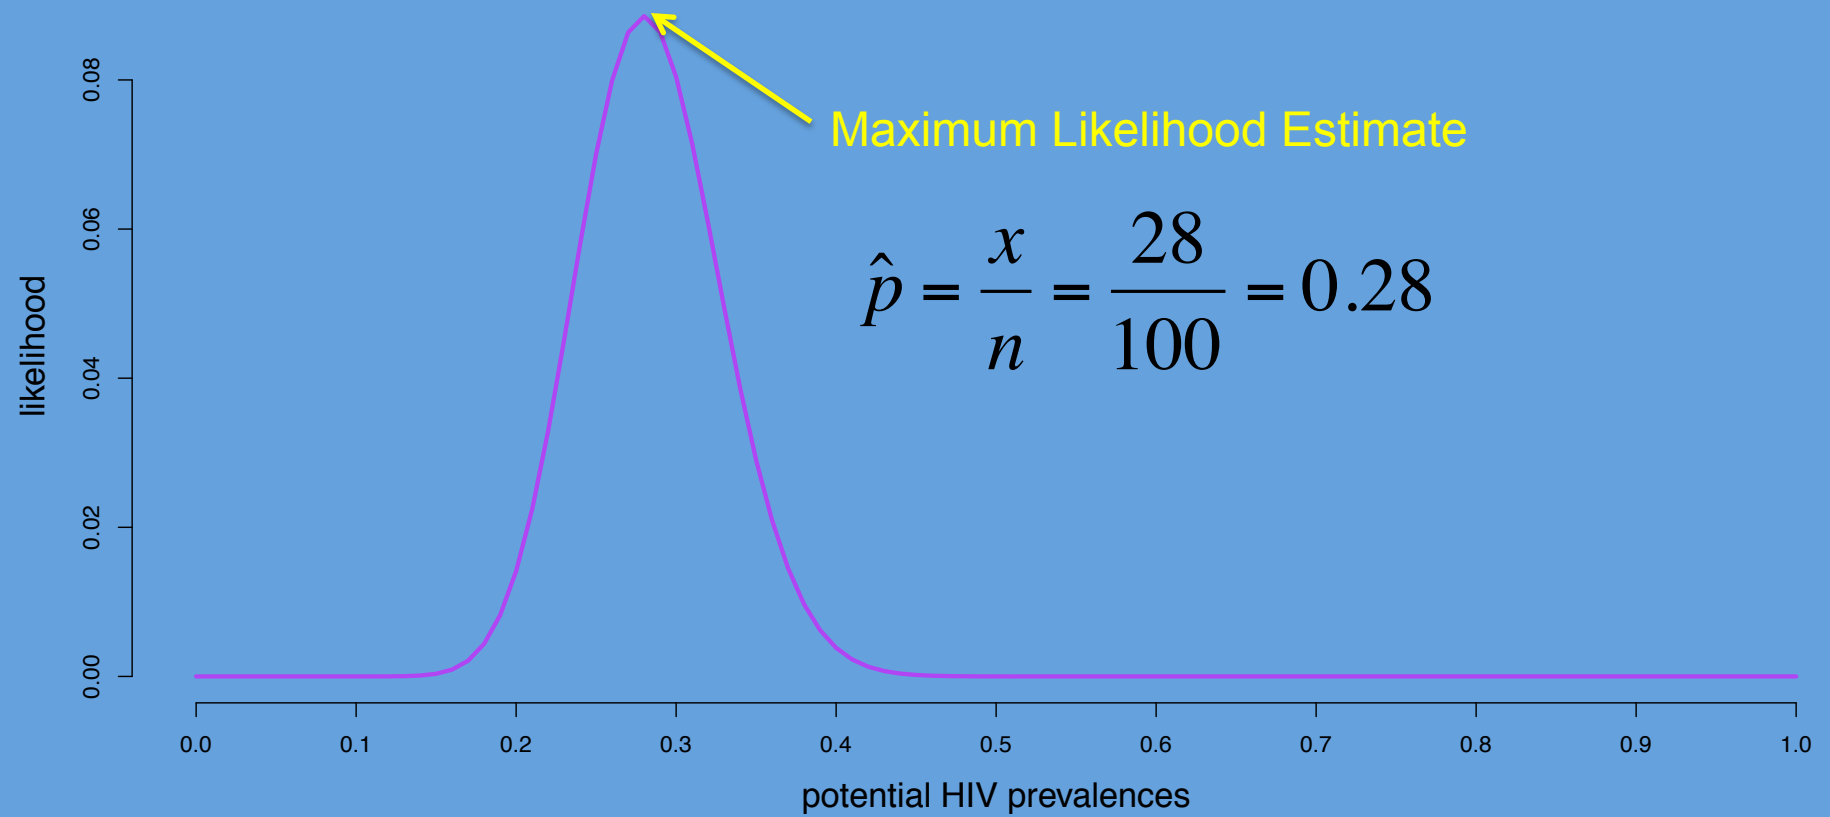

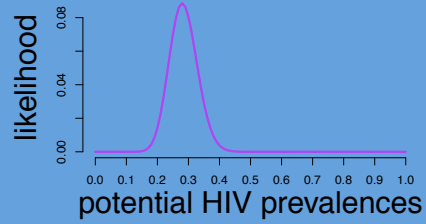

we usually minimize the  $-\log(\text{likelihood})$

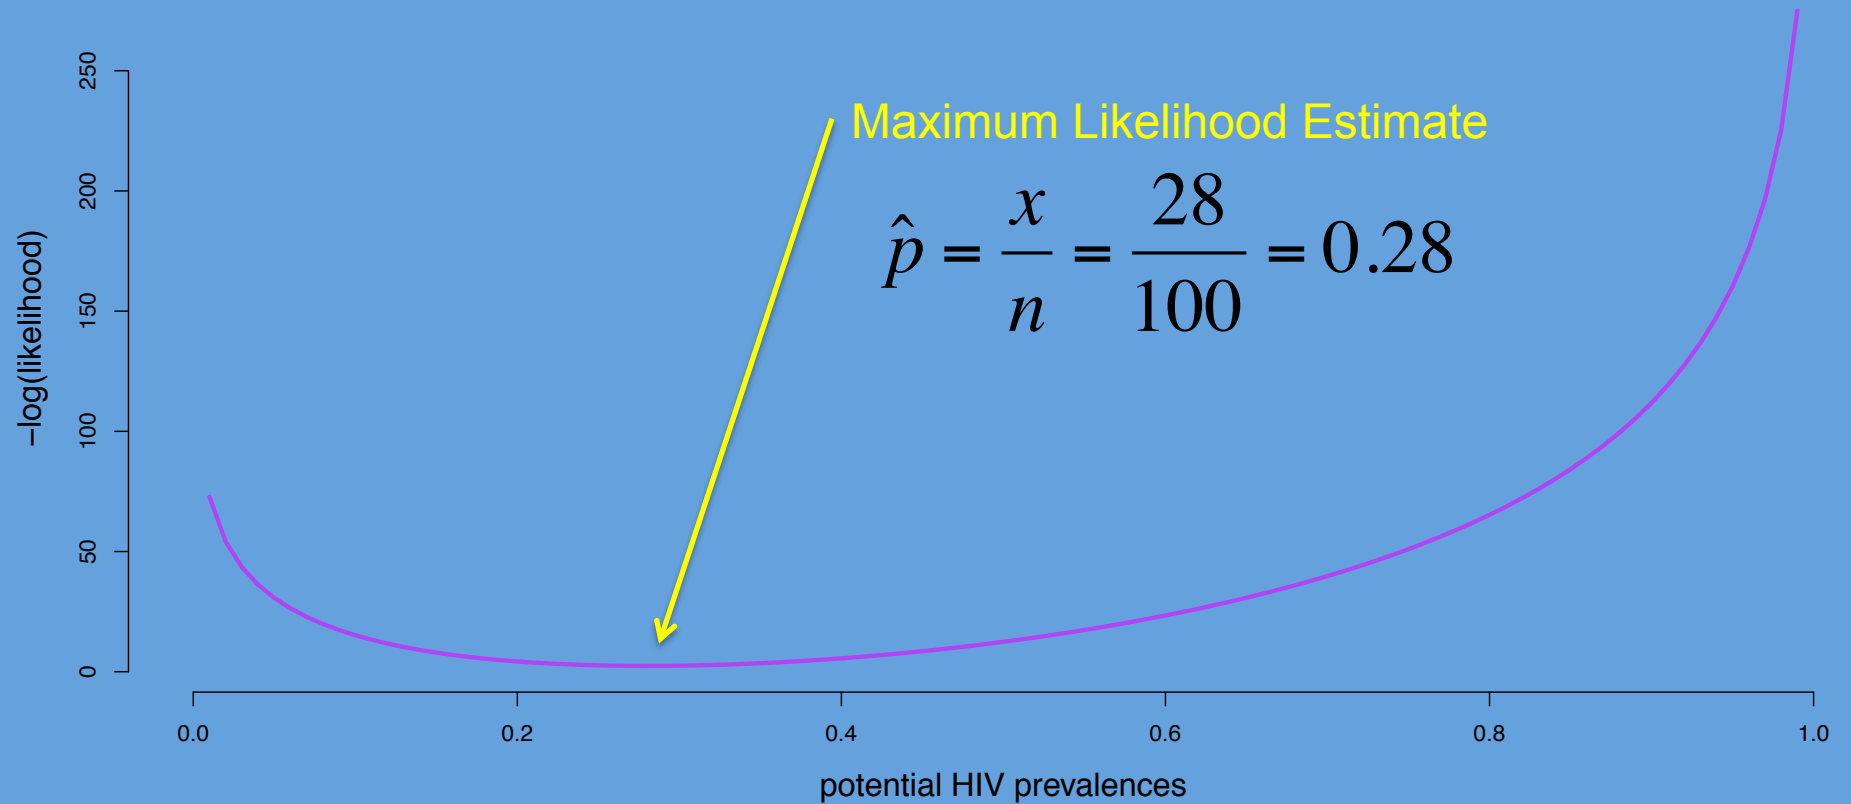

# Building Confidence Intervals

## Likelihood Ratio Test

If the null hypothesis were true then

$$-2\log\left(\frac{L(\text{null hypothesis})}{L(\text{alternative hypothesis})}\right) \sim \chi^2_{df=1}$$

$$2l_{\text{alternative}} - 2l_{\text{null}} \sim \chi^2_{df=1}$$

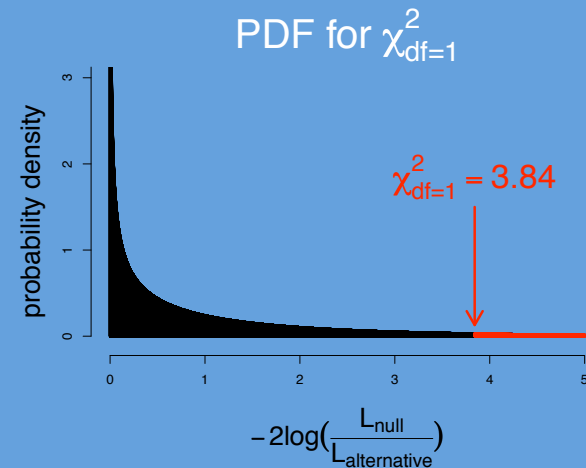

So if our  $\alpha = .05$ , then we reject any null hypothesis for which

$$2l_{MLE} - 2l_{null} > \chi^2_{df=1, \alpha=0.05} = 3.84$$

`> qchisq(p = .95, df = 1)`  
`[1] 3.841459`

$$2l_{MLE} - 2l_{null} > 3.84$$

$$l_{MLE} - l_{null} > 1.92$$

When  $l_{MLE} - l_{null} > 1.92$ ,  
we reject that null hypothesis.



# Building Confidence Intervals

## Likelihood Ratio Test

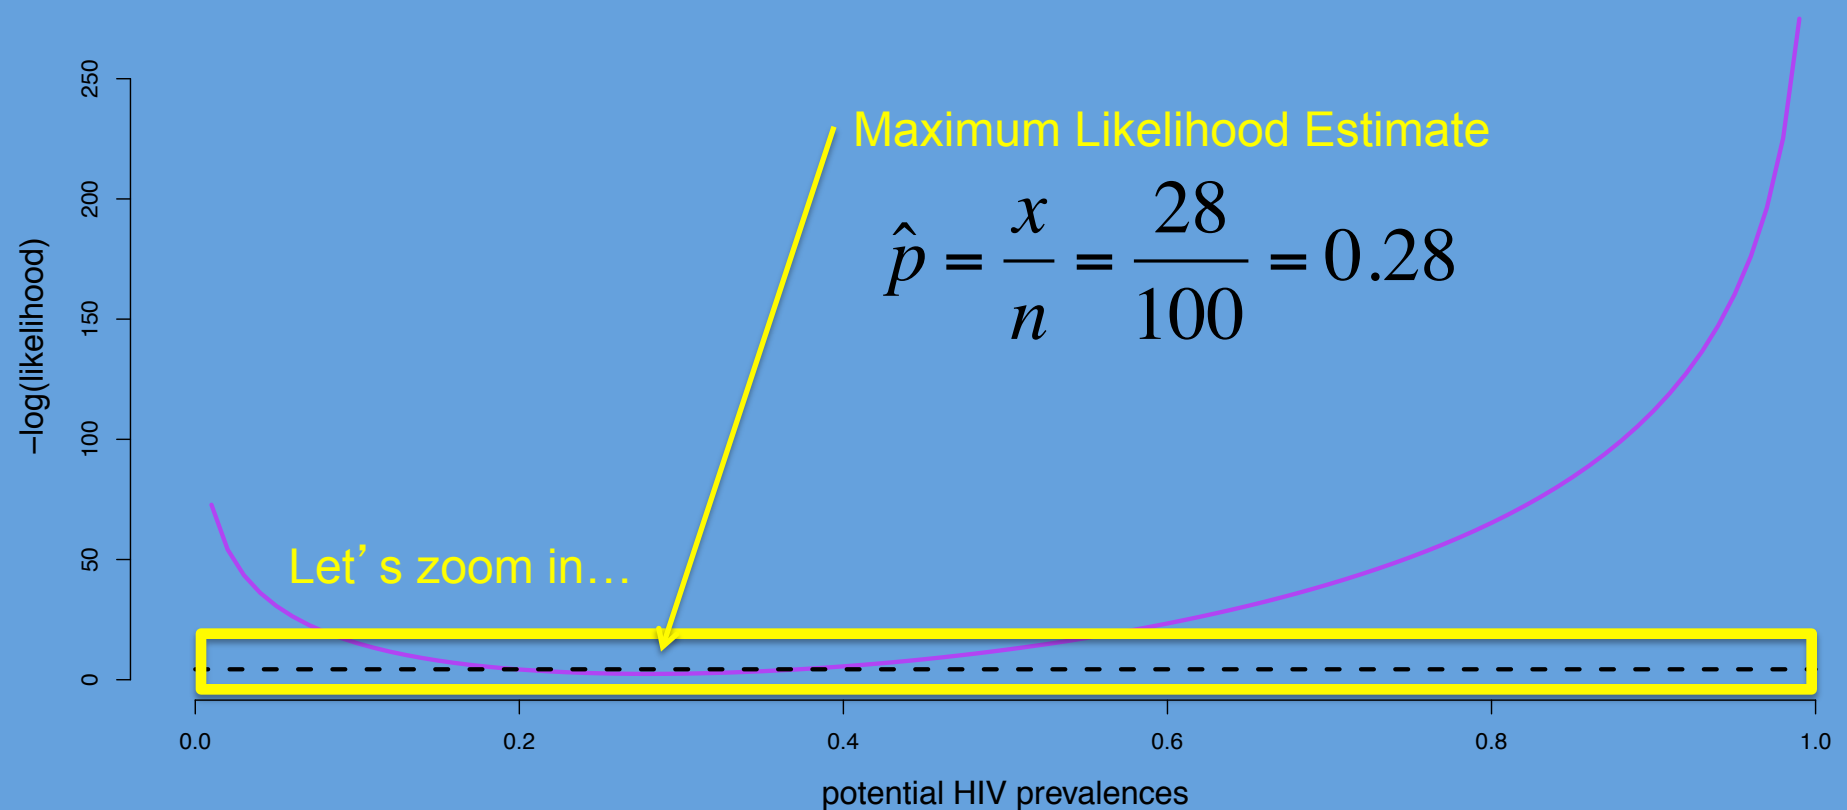

# Building Confidence Intervals

## Likelihood Ratio Test

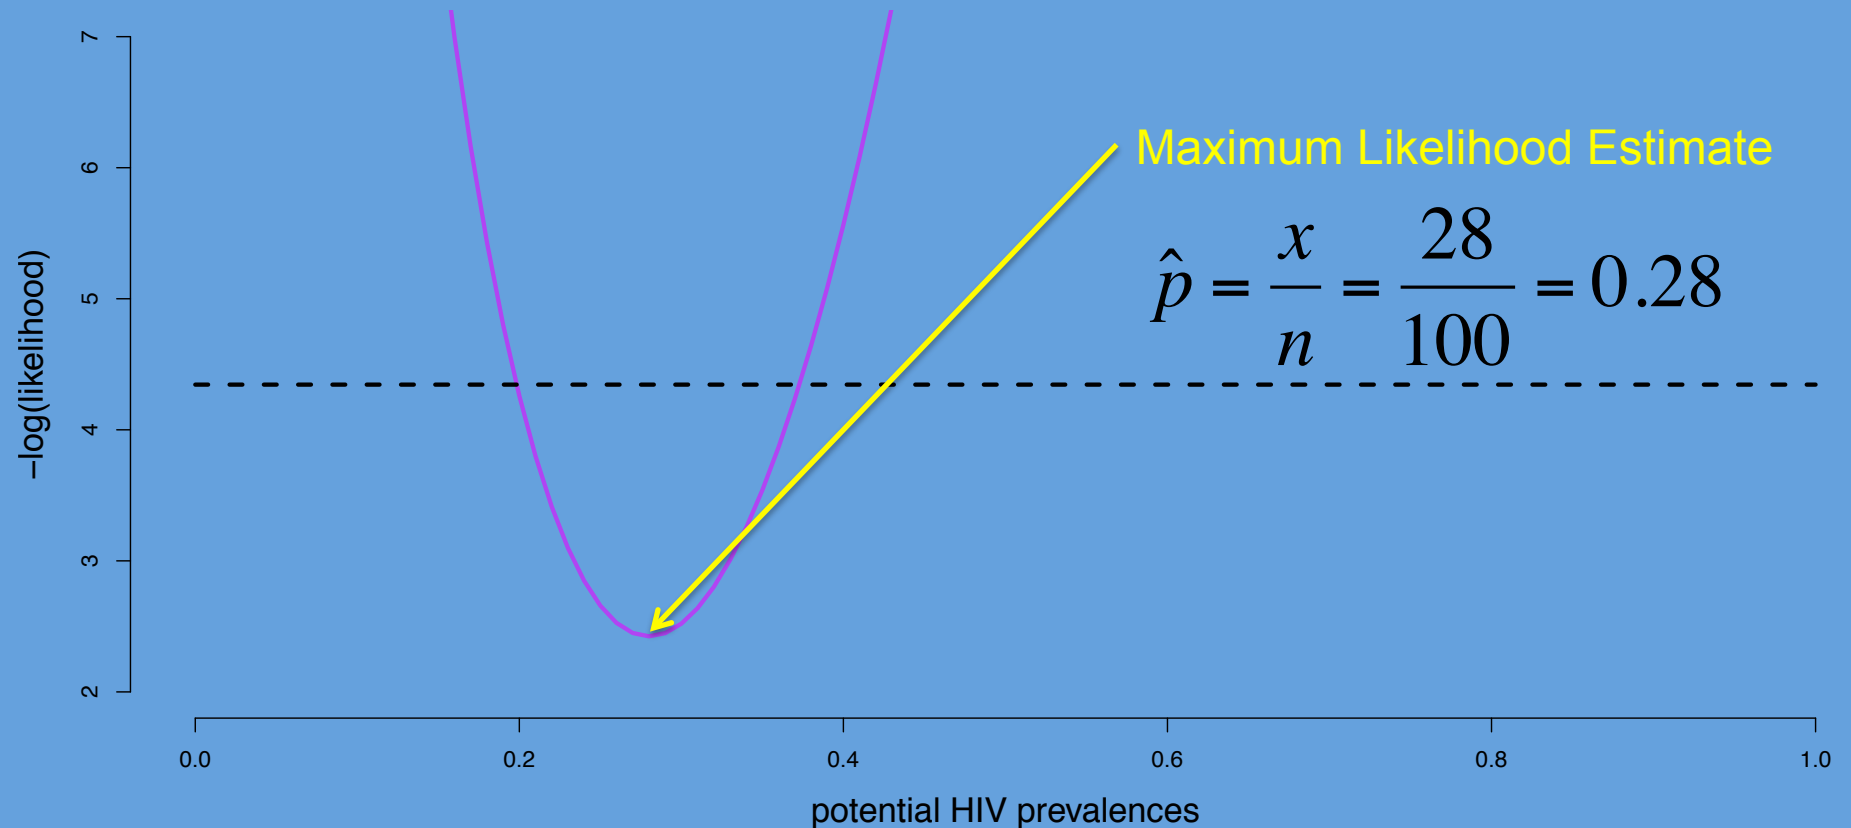

# Building Confidence Intervals

## Likelihood Ratio Test

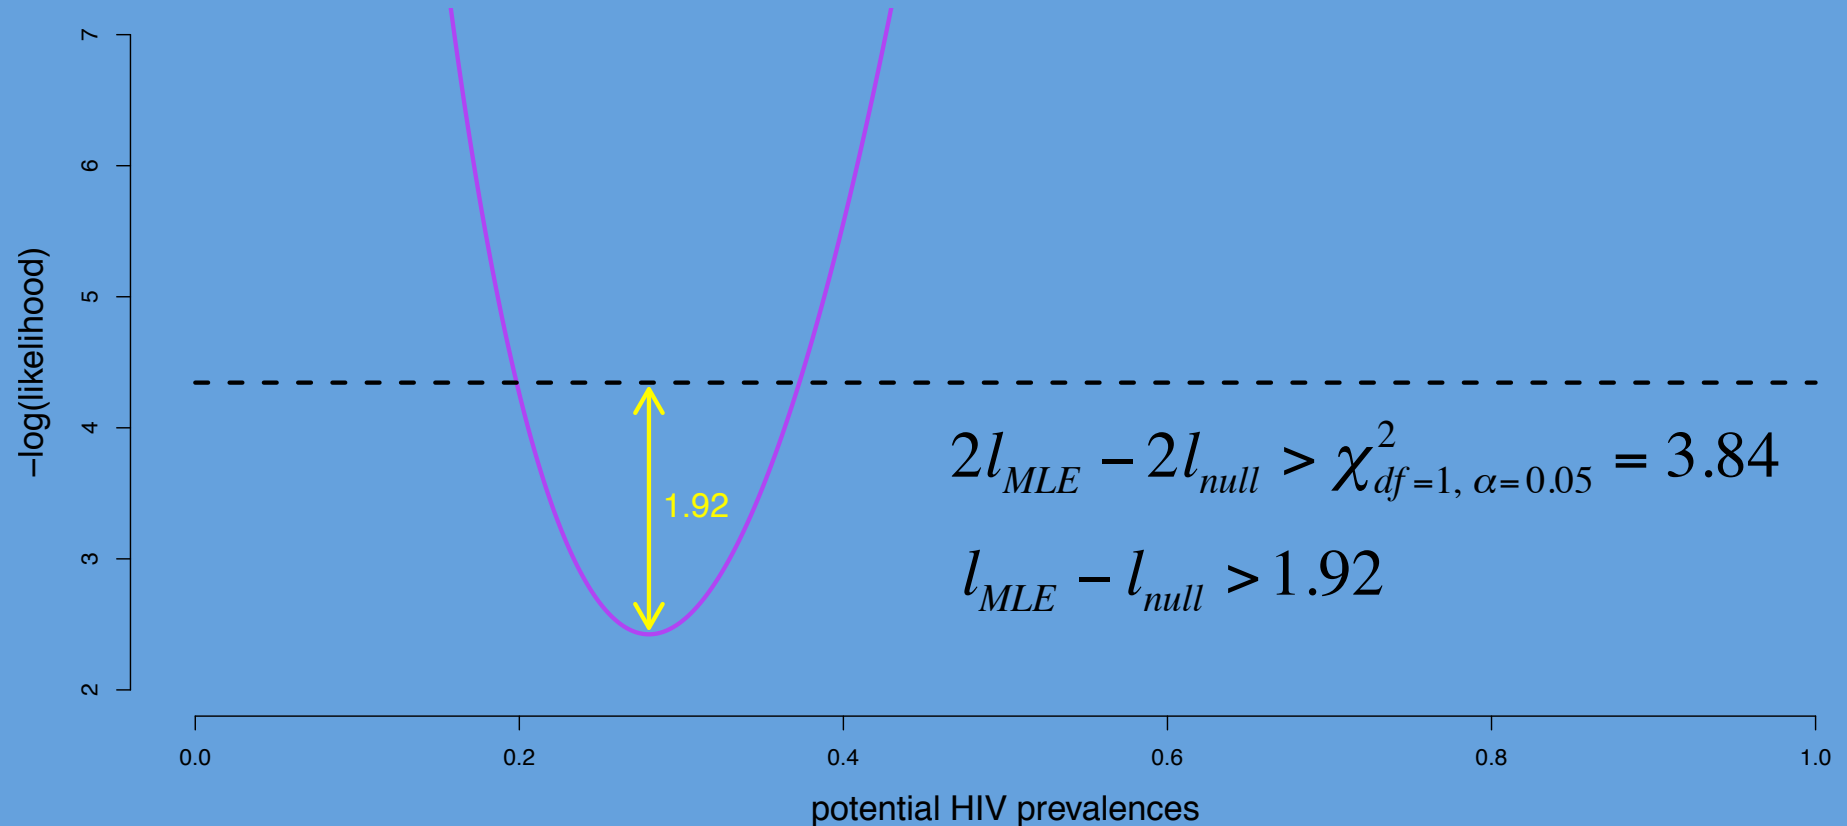

# Building Confidence Intervals

## Likelihood Ratio Test

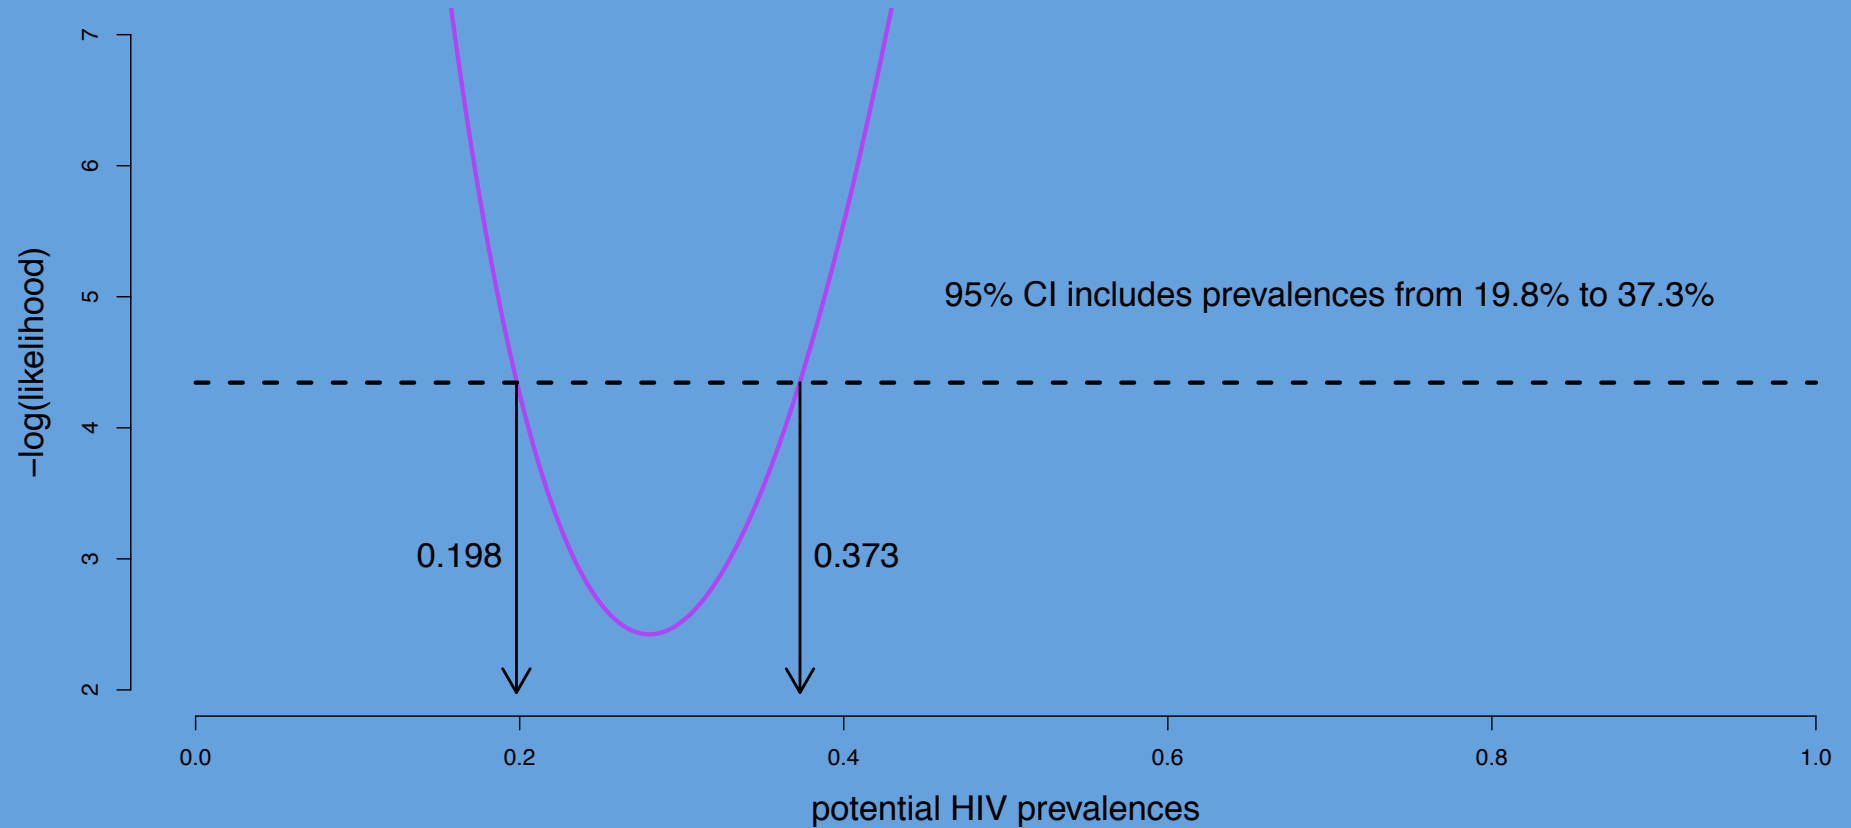

# Comparing Confidence Intervals

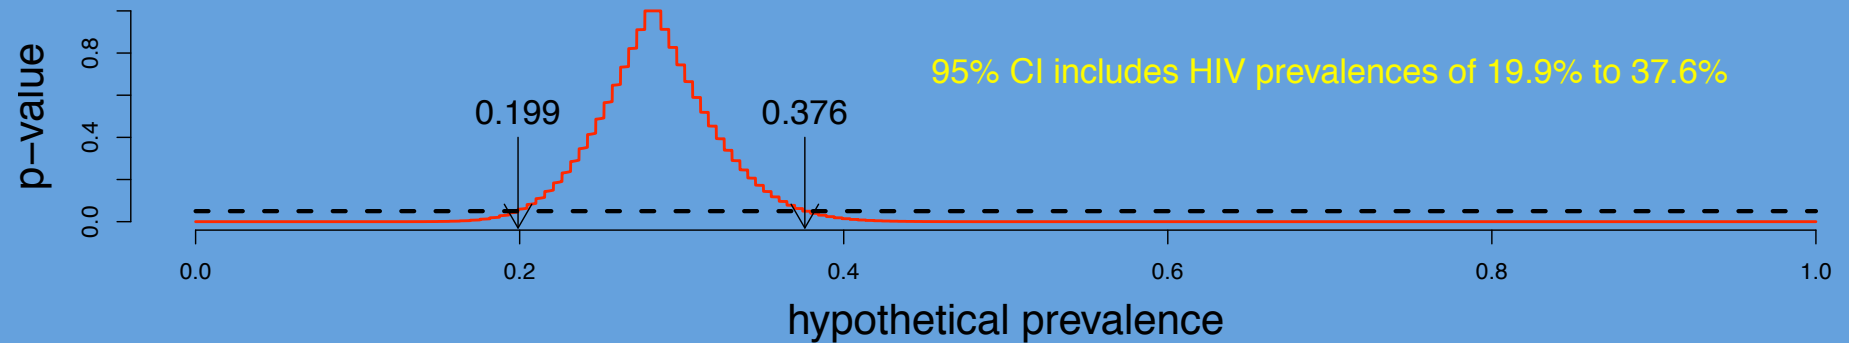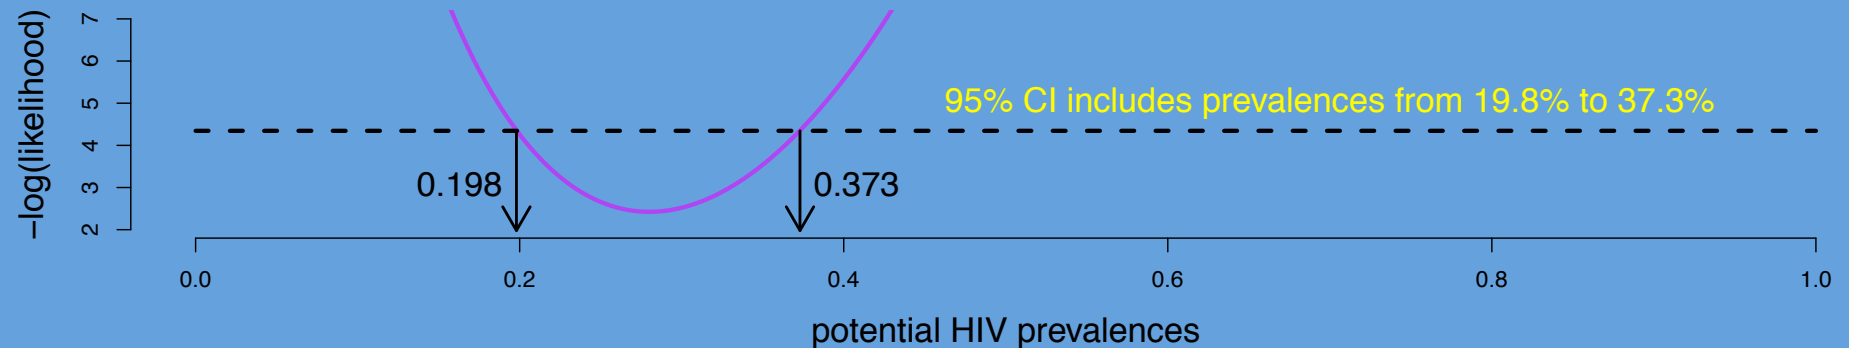

# Advantages of Likelihood

- Practical method for  
estimating parameters  
estimating variance of our estimates
- Easily adaptable to different probability  
distributions & dynamic models
