# Supplementary material for: How to Make Epidemiological Training Infectious
Source: PLoS Biol. 2012 Apr 3;10(4):e1001295. doi: 10.1371/journal.pbio.1001295 (PMC3317897; doi:10.1371/journal.pbio.1001295)
Supplement: Text S5 — Survey developed by MMED participants following the 2011 MMF outbreak to gather data on potential risk factors. (PDF) [file pbio.1001295.s020.pdf]

# MMF SURVEY

NAME: \_\_\_\_\_

## Demographic Questions

1. How old are you? \_\_\_\_\_
2. Gender?        M        F
3. Level of study?        Honours        Masters        Ph.D.        Post-doc        Professor        Other: \_\_\_\_\_
4. When did you arrive?    Before Monday        Monday        Tuesday        After Tues.  
a. What was their first day they participated in MMED? \_\_\_\_\_

## MMF Questions

1. Did you show symptoms of MMF?        Y        N  
a. If yes, when?        MON    TUES    WED    THURS    FR
2. Were you at MMED last year?        Y        N  
a. If yes, did you get MMF?        Y        N

## Social Questions

1. Did you go to the Ice-breaking activities last week?        Y        N  
a. Were you there for the big knot?        Y        N  
b. Did you play cards afterwards?        Y        N
2. Did you go to drumming?        Y        N
3. Did you go to coffee/tea early last week (up to Wednesday)?        6        4-5        2-4        <2
4. Did you wear your name-tag early last week?        Y        N  
a. Did you stop wearing it?        Y        N  
b. If so, when did you stop?        MO    TU    W    TH    FR
5. Where are you staying?        AIMS        WHALE WATCHERS  
a. Floor?        \_\_\_\_\_  
b. Room-mate?        Y \_\_\_\_\_        N
